# Supplementary material for: Electrochemical synthesis of γ-keto sulfones containing a β-quaternary carbon center via 1,2-migration
Source: Royal Society of Chemistry journal article supplement (doi:10.1039/d3gc02128a), 2023-01-01

# Supporting Information

## Electrochemical synthesis of $\gamma$ -keto sulfones containing $\beta$ -quaternary carbon center via 1,2-migration

Wen Xia,<sup>a</sup> Yawen Yang,<sup>a</sup> Xiaohui Zhang,<sup>a</sup> Liangzhen Hu,<sup>\*a</sup> and Yan Xiong<sup>\*a,b,c</sup>

<sup>a</sup>School of Chemistry and Chemical Engineering, Chongqing University, Chongqing 401331, P. R. China

<sup>b</sup>State Key Laboratory of Elemento-Organic Chemistry, Nankai University, Tianjin 300071, P. R. China

<sup>c</sup>School of Chemical and Environmental Engineering, and Collaborative Innovation Center for High Value Transformation of Coal Chemical Process By-products, Xinjiang Institute of Engineering, Xinjiang 830091, P. R. China

E-mail: xiong@cqu.edu.cn

### Table of contents

|                                                                         |            |
|-------------------------------------------------------------------------|------------|
| <b>1. General information</b>                                           | <b>S2</b>  |
| <b>1.1 Preparation of allylic alcohols</b>                              | <b>S2</b>  |
| <b>1.2 Preparation of aryl sulfonhydrazides</b>                         | <b>S3</b>  |
| <b>1.3 Preparation of <math>\gamma</math>-keto sulfones</b>             | <b>S3</b>  |
| <b>1.4 Gram-scale reaction</b>                                          | <b>S4</b>  |
| <b>1.5 Control experiments</b>                                          | <b>S4</b>  |
| <b>1.6 Reductive reaction</b>                                           | <b>S4</b>  |
| <b>1.7 Cyclic voltammetry (CV) experiments</b>                          | <b>S5</b>  |
| <b>2. Green metrics</b>                                                 | <b>S5</b>  |
| <b>3. Characterization of the products</b>                              | <b>S6</b>  |
| <b>4. References</b>                                                    | <b>S24</b> |
| <b>5. <sup>1</sup>H NMR, and <sup>13</sup>C NMR spectra of products</b> | <b>S25</b> |

## 1. General information

$^1\text{H}$ -NMR and  $^{13}\text{C}$ -NMR spectra were recorded in  $\text{CDCl}_3$  solution on a Bruker Avance 400 spectrometer at 20~25 °C.  $^1\text{H}$  NMR spectra were reported in parts per million using tetramethylsilane TMS ( $\delta = 0.00$  ppm) as an internal standard. The data of  $^1\text{H}$  NMR were reported as follows: chemical shift, multiplicity (s = singlet, d = doublet, t = triplet, q = quartet, dd= doublet of doublets, dt = doublet of triplets, m = multiplet), coupling constants ( $J$ , Hz), and integration.  $^{13}\text{C}$  NMR spectra were reported in parts per million using solvent  $\text{CDCl}_3$  ( $\delta = 77.2$  ppm) as an internal standard. The data of  $^{13}\text{C}$  NMR are reported as follows: chemical shift, multiplicity (s = singlet, d = doublet, t = triplet, q = quartet), and coupling constants ( $J$ , Hz). Reactions were monitored by TLC and column chromatography was performed using silica gel. Commercially available reagents were used without further purification unless otherwise specified.

### 1.1 Preparation of allylic alcohols

The raw materials (**1**) were prepared according to literature procedures.<sup>1-6</sup> To a two-necked flask under argon atmosphere loaded with a solution of ketone (5 mmol) in anhydrous THF (5 mL), then Grignard reagent (1.0 M in THF, 5.5 mL, 5.5 mmol, 1.1 eq.) was dropwise added via syringe under vigorous stirring in ice-bath. After continuously stirring for 0.5 h, the mixture was warmed to room temperature (or 50 °C) and stirred for 5 h. Then it was detected by TLC and aqueous  $\text{NH}_4\text{Cl}$  (6 mL) was added at 0 °C to quench the reaction. Removed THF solvent. Subsequently, the mixture was extracted with EtOAc (5 mL  $\times$  3) and the combined organic layer was dried with anhydrous magnesium. The solvent was removed in vacuo by a rotary evaporator and the final crude was purified by chromatography on silica gel to yield desired allylic alcohol.

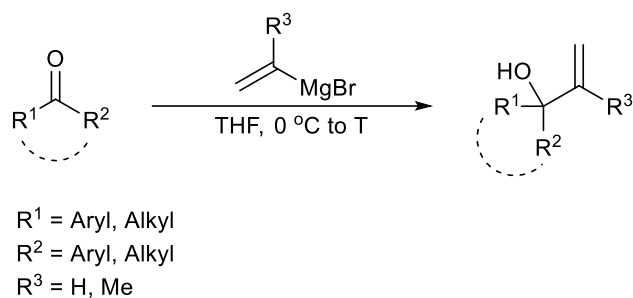

**For  $\alpha$ ,  $\alpha$ -diaryl allylic alcohols (1a-m):** 0 °C to rt.

**For  $\alpha$ -alkyl,  $\alpha$ -aryl allylic alcohols (1m-r) and  $\alpha$ ,  $\alpha$ -dialkyl allylic alcohols (1s-z):**  
0 °C to 50 °C.

### 1.2 Preparation of aryl sulfonylhydrazides

The raw materials (**2**) were prepared according to literature procedures.<sup>7-10</sup> To a two-necked flask under argon atmosphere charged with arylsulfonyl chloride (5 mmol) in THF solution (25 mL), and subsequently added hydrazine hydrate (15 mmol, 3 eq.) dropwise under ice bath conditions. After stirring at 0 °C for 30 minutes, detected by TLC. Then evaporated THF solution in vacuum, and extracted the aqueous solution of crudes with ethyl acetate (30 mL  $\times$  3). Organic layer was dried over anhydrous magnesium and removed solvents. Then the crude was purified by chromatography on silica gel to obtain desired aryl sulfonylhydrazides.

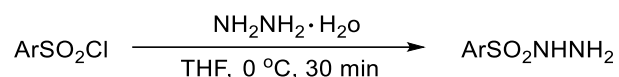

### 1.3 Preparation of $\gamma$ -keto sulfones

An undivided cell was equipped with graphite plate anode (10  $\times$  10  $\times$  3 mm) and foamed nickel cathode (10  $\times$  10  $\times$  2 mm). Allyl alcohols **1** (0.25 mmol), sulfonyl hydrazines **2** (0.5 mmol, 2 eq.) and Bu<sub>4</sub>NBF<sub>4</sub> electrolyte (0.5 mmol) were respectively added into the cell with a 6 mL solution of MeCN/H<sub>2</sub>O (5/1). The mixture exposed to air was stirred and electrolyzed under constant current conditions (15 mA) at room temperature for 4 hours. Then it was extracted with ethyl acetate (15 mL  $\times$  3), and

dried over anhydrous MgSO<sub>4</sub>. After concentrating in vacuum, the residue was purified by column chromatography on silica gel to get target  $\gamma$ -keto sulfone possessing  $\beta$ -quaternary carbon center.

#### 1.4 Gram-scale reaction

An undivided round-bottomed flask (250 mL) was equipped with graphite plate anode (10 × 10 × 3 mm) and foamed nickel cathode (10 × 10 × 2 mm), which were connected to a power supply. 2-methyl-1,1-diphenylprop-2-en-1-ol **1a** (5 mmol), 4-methylbenzenesulfonhydrazide **2a** (10 mmol, 2 eq.) and Bu<sub>4</sub>NBF<sub>4</sub> electrolyte (10 mmol) were respectively added into the cell with a solution of MeCN/H<sub>2</sub>O (120 mL, 5/1). The mixture exposed to air was stirred and electrolyzed under constant current conditions (15 mA) at room temperature for 72 hours. Then evaporated MeCN solvent in vacuum and extracted with ethyl acetate (50 mL × 3). After drying over anhydrous MgSO<sub>4</sub> and concentrating in vacuum, the residue was purified by column chromatography on silica gel to obtain target  $\gamma$ -keto sulfone **3aa** (1.27 g, 84%).

#### 1.5 Reductive reaction

A round bottomed flask was filled with  $\gamma$ -keto sulfone (**3aa**, 0.5 mmol, 189.2 mg) in ethanol solution (2 mL). Added sodium borohydride (1.0 mmol, 2 eq.) slowly to it under ice bath conditions. The mixture was continuously stirred for 2 hours at room temperature and detected by TLC. Quenched the reaction by adding dilute hydrochloric acid dropwise under ice bath condition. Washed with saturated salt water and ethyl acetate (15 mL × 3). After drying with anhydrous MgSO<sub>4</sub> and concentrating in vacuum, the mixture was purified by column chromatography on silica gel and obtained  $\gamma$ -hydroxyl sulfone **6** (129.2 mg, 68%).

#### 1.6 Control experiments

Add three equivalents of 2,2,6,6-tetramethylpiperidiny-1-oxide (TEMPO) or butylated hydroxytoluene (BHT) to the standard reaction system, and other operations are the same as **1.3**.

## 1.7 Cyclic voltammetry (CV) experiments

Cyclic voltammetry experiments were carried out in a three-electrode cell (25 mL) at room temperature. A steady glassy carbon electrode was used as the working electrode, while a platinum wire was used as the counter electrode and an Ag/AgCl electrode was used as reference. A mixed CH<sub>3</sub>CN/H<sub>2</sub>O (12 mL, 5/1) solution containing 1 mmol nBu<sub>4</sub>NBF<sub>4</sub> was added into the cell. 0.5 mmol **1a** was added to determine the oxidation potential of itself. 0.1 mmol **2a** was added to determine the oxidation potential of **2a**. The scan rate was 0.1 V/s, ranging from 0 V to 3 V.

## 2. Green metrics

Taking standard reactions as examples and calculations are conducted using atom economy (atom efficiency) and theoretical environmental factor (E-factor) as representative green metrics<sup>11-13</sup>.

- (a) Ji's work<sup>14</sup>: two steps, unstable PIDA, heating and other by-products (PhI, AcOH, etc.).

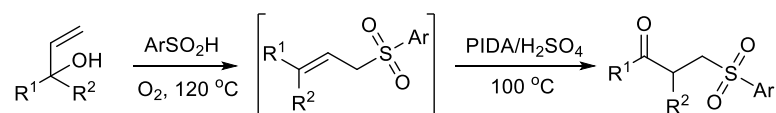

While R<sup>1</sup> = R<sup>2</sup> = Ph: Atom efficiency = 0.53, E<sub>theor</sub> = 0.89.

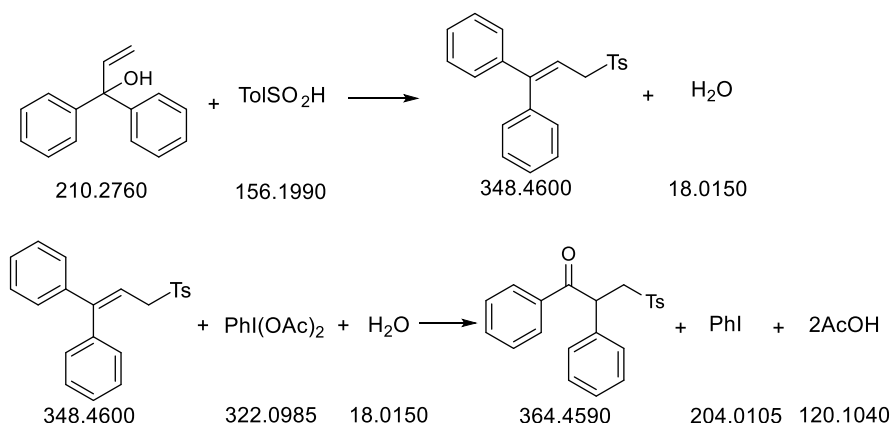

- (b) Wang's work<sup>15</sup>: unstable and toxic azides, high temperature, 6 equivalents of sodium p-toluenesulfonate, and many by-products (TsNH<sub>2</sub>, TMSOH, NaN<sub>3</sub>, etc.)

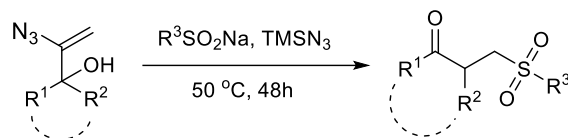

While  $R^1 = R^2 = \text{Ph}$ : Atom efficiency = 0.85,  $E_{\text{theor}} = 0.18$ .

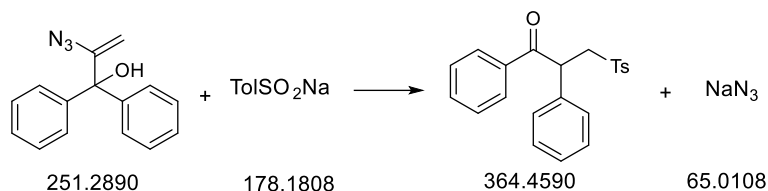

(c) Our work: room temperature, one step, without oxidants and catalysts, only  $\text{H}_2$  and  $\text{N}_2$  by-products.

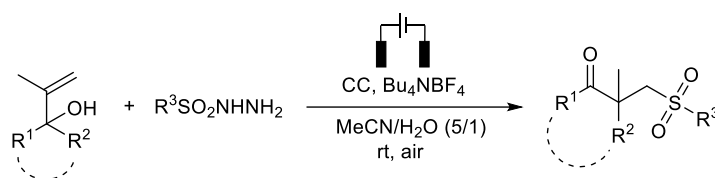

While  $R^1 = R^2 = \text{Ph}$ : Atom efficiency = 0.92,  $E_{\text{theor}} = 0.08$ .

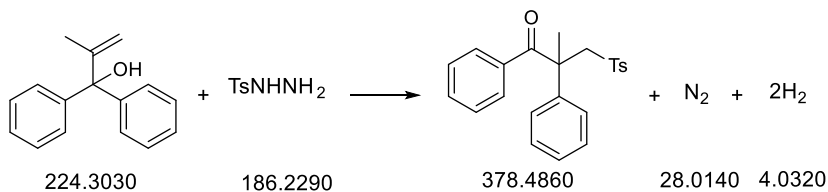

Overall, this electrochemical strategy for constructing  $\gamma$ -keto sulfones has higher atom economy and lower theoretical environmental factor, which is in line with the concept of green chemistry.

### 3. Characterization of the products

#### 2-methyl-1,2-diphenyl-3-tosylpropan-1-one (3aa)

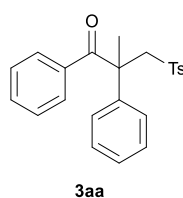

White solid, 84.2 mg, 89% yield, mp 102-104 °C.

$^1\text{H NMR}$  (400 MHz,  $\text{CDCl}_3$ ):  $\delta$  7.49 (d,  $J = 8.0$  Hz, 2H), 7.32-7.26 (m, 2H), 7.25-7.20 (m, 6H), 7.16-7.12 (m, 4H), 4.00 (d,  $J = 14.4$  Hz, 1H), 3.72 (d,  $J = 14.4$  Hz, 1H), 2.32 (s, 3H), 2.04 (s, 3H).

$^{13}\text{C NMR}$  (101 MHz,  $\text{CDCl}_3$ ):  $\delta$  201.31, 144.14, 139.52, 138.81, 136.35, 131.95, 129.74, 129.37, 129.36, 128.22, 128.08, 127.68, 126.77, 65.70, 53.81, 22.26, 21.71.

HRMS (ESI)  $m/z$ :  $[\text{M} + \text{Na}]^+$  Calcd for  $\text{C}_{23}\text{H}_{22}\text{O}_3\text{SNa}$  401.1182, found 401.1186.

### 2-methyl-1,2-di-*p*-tolyl-3-tosylpropan-1-one (3ba)

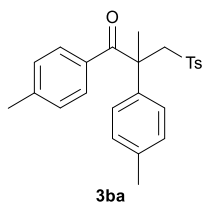

White solid, 87.4 mg, 86% yield, mp 88-90 °C.

**<sup>1</sup>H NMR** (400 MHz, CDCl<sub>3</sub>): δ 7.52 (d, *J* = 8.4 Hz, 2H), 7.29 (d, *J* = 8.4 Hz, 2H), 7.17 (d, *J* = 8.0 Hz, 2H), 7.13 (d, *J* = 8.0 Hz, 2H), 7.02 (t, *J* = 8.0 Hz, 4H), 3.99 (d, *J* = 14.8 Hz, 1H), 3.84 (d, *J* = 14.8 Hz, 1H), 2.38 (s, 3H), 2.29 (s, 3H), 2.28 (s, 3H), 2.09 (s, 3H).

**<sup>13</sup>C NMR** (101 MHz, CDCl<sub>3</sub>): δ 200.77, 143.86, 142.65, 138.79, 137.73, 136.50, 133.26, 129.90, 129.73, 129.53, 128.84, 127.64, 126.66, 65.81, 53.37, 22.27, 21.66, 21.57, 21.14.

HRMS (ESI) *m/z*: [M + Na]<sup>+</sup> Calcd for C<sub>25</sub>H<sub>26</sub>O<sub>3</sub>SNa 429.1495, found 429.1497.

### 1,2-bis(4-fluorophenyl)-2-methyl-3-tosylpropan-1-one (3ca)

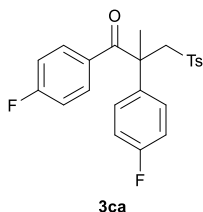

White solid, 82.9 mg, 80% yield, mp 134-136 °C.

**<sup>1</sup>H NMR** (400 MHz, CDCl<sub>3</sub>): δ 7.54 (d, *J* = 8.0 Hz, 2H), 7.41-7.38 (m, 2H), 7.26-7.21 (m, 4H), 6.98-6.90 (m, 4H), 3.94 (d, *J* = 14.8 Hz, 1H), 3.83 (d, *J* = 14.8 Hz, 1H), 2.34 (s, 3H), 2.02 (s, 3H).

**<sup>13</sup>C NMR** (101 MHz, CDCl<sub>3</sub>): δ 199.42, 164.99 (d, *J* = 242.6 Hz), 162.49 (d, *J* = 236.1 Hz), 144.36, 138.64, 135.03 (d, *J* = 3.4 Hz), 132.23 (d, *J* = 9.1 Hz), 131.89 (d, *J* = 3.3 Hz), 129.79, 128.70 (d, *J* = 8.2 Hz), 127.64, 116.39 (d, *J* = 21.5 Hz), 115.51 (d, *J* = 21.8 Hz), 65.60, 53.26, 22.50, 21.72.

HRMS (ESI) *m/z*: [M + Na]<sup>+</sup> Calcd for C<sub>23</sub>H<sub>20</sub>F<sub>2</sub>O<sub>3</sub>SNa 437.0993, found 437.0996.

### 1,2-bis(4-chlorophenyl)-2-methyl-3-tosylpropan-1-one (3da)

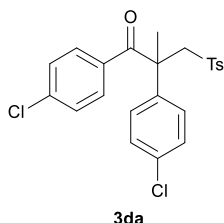

White solid, 88.3 mg, 79% yield mp 100-102 °C.

**<sup>1</sup>H NMR** (400 MHz, CDCl<sub>3</sub>): δ 7.42 (d, *J* = 8.4 Hz, 2H), 7.23 (d, *J* = 8.8 Hz, 2H), 7.16-7.08 (m, 8H), 3.85 (d, *J* = 14.4 Hz, 1H), 3.78 (d, *J* = 14.8 Hz, 1H), 2.41 (s, 3H), 2.11 (s, 3H).

**<sup>13</sup>C NMR** (101 MHz, CDCl<sub>3</sub>): δ 199.59, 144.41, 138.77, 138.38, 137.48, 134.56, 133.86, 130.96, 129.79, 129.57, 128.72, 128.35, 127.60, 65.37, 53.33, 22.18, 21.75.

HRMS (ESI) *m/z*: [M + Na]<sup>+</sup> Calcd for C<sub>23</sub>H<sub>20</sub>Cl<sub>2</sub>O<sub>3</sub>SNa 469.0402, found 469.0405.

### 1,2-bis(4-bromophenyl)-2-methyl-3-tosylpropan-1-one (3ea)

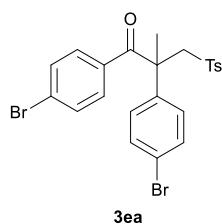

White solid, 88.5 mg, 66% yield, mp 118-119 °C.

**<sup>1</sup>H NMR** (400 MHz, CDCl<sub>3</sub>): δ 7.48 (d, *J* = 8.0 Hz, 2H), 7.38 (d, *J* = 7.2 Hz, 2H), 7.23-7.19 (m, 4H), 7.09 (d, *J* = 8.8 Hz, 2H), 3.89 (dd, *J* = 18.0, 14.8 Hz, 2H), 2.42 (s, 3H), 2.08 (s, 3H).

**<sup>13</sup>C NMR** (101 MHz, CDCl<sub>3</sub>): δ 199.67, 144.39, 138.25, 137.87, 134.23, 132.48, 131.70, 131.04, 129.79, 128.66, 127.55, 127.43, 122.77, 65.22, 53.34, 22.08, 21.77.

HRMS (ESI) *m/z*: [M + Na]<sup>+</sup> Calcd for C<sub>23</sub>H<sub>20</sub>Br<sub>2</sub>O<sub>3</sub>SNa 558.9372, found 558.9373.

### 2-methyl-3-tosyl-1,2-bis(3-(trifluoromethyl)phenyl)propan-1-one (3fa)

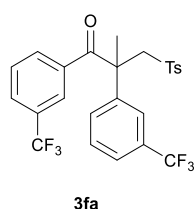

Colourless oil, 115.7 mg, 90% yield.

**<sup>1</sup>H NMR** (400 MHz, CDCl<sub>3</sub>): δ 7.56 (d, *J* = 7.6 Hz, 1H), 7.51 (s, 1H), 7.46-7.40 (m, 5H), 7.37 (d, *J* = 8.0 Hz, 1H), 7.33-7.26 (m, 2H), 7.10 (d, *J* = 8.0 Hz, 2H), 3.95 (d, *J* = 14.8 Hz, 1H), 3.82 (d, *J* = 14.8 Hz, 1H), 2.29 (s, 3H), 2.07 (s, 3H).

**<sup>13</sup>C NMR** (101 MHz, CDCl<sub>3</sub>): δ 199.36, 144.64, 139.86, 138.12, 136.32, 132.19, 131.91 (q, *J* = 32.7 Hz), 131.10 (q, *J* = 24.0 Hz), 130.45, 130.11, 129.86, 129.04, 128.76 (q, *J* = 3.5 Hz), 127.57, 126.21 (q, *J* = 4.0 Hz), 125.30 123.62 (q, *J* = 3.7 Hz), 123.71 (q, *J* = 271.0 Hz), 123.62 (q, *J* = 3.7 Hz), 123.49 (q, *J* = 273.6 Hz), 65.01, 53.66, 22.04, 21.59.

HRMS (ESI) *m/z*: [M + Na]<sup>+</sup> Calcd for C<sub>25</sub>H<sub>20</sub>F<sub>6</sub>O<sub>3</sub>SNa 537.0930, found 537.0932.

### 2-methyl-1-phenyl-2-(p-tolyl)-3-tosylpropan-1-one (3ga) and 2-methyl-2-phenyl-1-(p-tolyl)-3-tosylpropan-1-one (3ga')

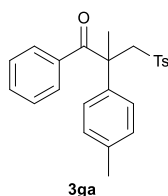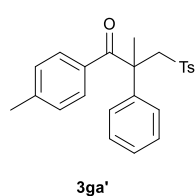

Colourless oil, 90.3 mg, 92% yield.

**<sup>1</sup>H NMR** (400 MHz, CDCl<sub>3</sub>): First isomer: δ 7.46 (d, *J* = 7.6 Hz, 2H), 7.30-7.25 (overlapped, 2H), 7.19-7.15 (overlapped, 3H), 7.13-7.06 (overlapped, 4H), 6.97 (d, *J* = 7.6 Hz, 2H), 3.95 (d, *J* = 14.4 Hz, 1H), 3.73 (d, *J* = 14.8 Hz, 1H), 2.31 (s, 3H), 2.22 (s, 3H), 2.00 (s, 3H). Second isomer: δ 7.46 (d, *J* = 7.6 Hz, 2H), 7.30-7.25 (overlapped, 2H), 7.19-7.15 (overlapped, 3H), 7.13-7.06 (overlapped, 4H), 6.93 (d, *J* =



7.6 Hz, 2H), 3.95 (d,  $J = 14.4$  Hz, 1H), 3.73 (d,  $J = 14.8$  Hz, 1H), 2.30 (s, 3H), 2.20 (s, 3H), 2.04 (s, 3H).

$^{13}\text{C}$  NMR (101 MHz,  $\text{CDCl}_3$ ): First isomer:  $\delta$  201.42, 143.97, 142.74, 138.74, 137.87, 136.26, 131.85, 129.98, 129.59, 129.34, 128.16, 127.65, 126.59, 65.69, 53.39, 22.20, 21.67, 21.14. Second isomer:  $\delta$  200.59, 144.01, 139.70, 138.80, 136.39, 133.17, 129.70, 129.66, 129.25, 128.87, 127.93, 127.62, 126.78, 65.76, 53.74, 22.30, 21.67, 21.57.

HRMS (ESI)  $m/z$ :  $[\text{M} + \text{Na}]^+$  Calcd for  $\text{C}_{24}\text{H}_{24}\text{O}_3\text{SNa}$  415.1338, found 415.1337.

**1-(4-fluorophenyl)-2-methyl-2-phenyl-3-tosylpropan-1-one (3ha) and 2-(4-fluorophenyl)-2-methyl-1-phenyl-3-tosylpropan-1-one (3ha')**

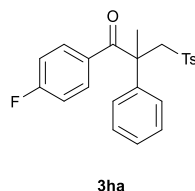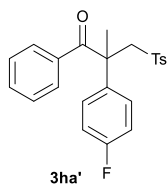

White solid, 86.1 mg, 87% yield, mp 99-107 °C.

$^1\text{H}$  NMR (400 MHz,  $\text{CDCl}_3$ ): First isomer:  $\delta$  7.55 (t,  $J = 8.8$  Hz, 2H), 7.41-7.38 (overlapped, 2H), 7.33 (d,  $J = 6.8$  Hz, 2H), 7.28 (overlapped, 2H), 7.22 (t,  $J = 8.0$  Hz, 2H), 6.90 (t,  $J = 8.4$  Hz, 3H), 4.04 (d,  $J = 14.4$  Hz, 1H), 3.78 (d,  $J = 14.4$  Hz, 1H), 2.39 (s, 3H), 2.11 (s, 3H). Second isomer:  $\delta$  7.55 (t,  $J = 8.8$  Hz, 2H), 7.41-7.38 (overlapped, 1H), 7.28 (overlapped, 3H), 7.26 (d,  $J = 2.8$  Hz, 2H), 7.23 (t,  $J = 8.0$  Hz, 2H), 6.96 (t,  $J = 8.4$  Hz, 3H), 3.97 (d,  $J = 14.8$  Hz, 1H), 3.85 (d,  $J = 14.4$  Hz, 1H), 2.40 (s, 3H), 2.10 (s, 3H).

$^{13}\text{C}$  NMR (101 MHz,  $\text{CDCl}_3$ ): First isomer:  $\delta$  199.61, 164.78 (d,  $J = 255.1$  Hz), 144.20, 139.44, 138.62, 132.25(d,  $J = 3.5$  Hz), 132.19, 132.13 (d,  $J = 6.8$  Hz), 129.76, 129.46, 127.66, 126.72, 115.36 (d,  $J = 21.8$  Hz), 65.68, 53.79, 22.32, 21.71. Second isomer:  $\delta$  201.07, 162.48 (d,  $J = 249.1$  Hz), 144.28, 138.75, 135.92, 135.03 (d,  $J = 3.5$  Hz), 129.75, 129.39, 128.71 (d,  $J = 8.2$  Hz), 128.31, 128.20, 127.62, 116.25 (d,  $J = 21.5$  Hz), 65.56, 53.23, 22.41, 21.69.

HRMS (ESI)  $m/z$ :  $[\text{M} + \text{Na}]^+$  Calcd for  $\text{C}_{23}\text{H}_{21}\text{FO}_3\text{SNa}$  419.1088, found 419.1089.

**1-(4-bromophenyl)-2-methyl-2-phenyl-3-tosylpropan-1-one (3ia) and 2-(4-bromophenyl)-2-methyl-1-phenyl-3-tosylpropan-1-one (3ia')**

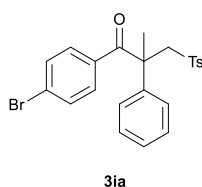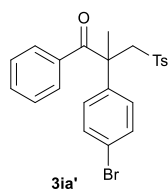

Colourless oil, 94.9 mg, 83% yield.

**<sup>1</sup>H NMR** (400 MHz, CDCl<sub>3</sub>): First isomer: δ 7.47 (dt, *J* = 8.4, 2.0 Hz, 2H), 7.32-7.43 (overlapped, 3H), 7.20-7.16 (overlapped, 3H), 7.14-7.09 (overlapped, 5H), 3.97 (d, *J* = 14.8 Hz, 1H), 3.68 (d, *J* = 14.8 Hz, 1H), 2.30 (s, 3H), 2.00 (s, 3H). Second isomer: δ 7.39 (dt, *J* = 8.4, 2.0 Hz, 2H), 7.32-7.43 (overlapped, 3H), 7.20-7.16 (overlapped, 3H), 7.14-7.09 (overlapped, 3H), 7.03 (dt, *J* = 8.8, 2.0 Hz, 2H), 3.84 (s, 2H), 2.32 (s, 3H), 2.00 (s, 3H).

**<sup>13</sup>C NMR** (101 MHz, CDCl<sub>3</sub>): First isomer: δ 200.13, 144.18, 139.22, 138.10, 134.90, 131.46, 130.91, 129.73, 129.44, 128.19, 127.60, 126.90, 126.63, 65.51, 53.73, 22.18, 21.65. Second isomer: δ 200.64, 144.21, 138.66, 138.30, 135.62, 132.27, 132.22, 129.69, 129.38, 128.68, 128.30, 127.49, 122.48, 65.27, 53.29, 22.09, 21.68.

HRMS (ESI) *m/z*: [M + H]<sup>+</sup> Calcd for C<sub>23</sub>H<sub>22</sub>BrO<sub>3</sub>S 457.0468, found 457.0468.

**2-(3,4-dimethylphenyl)-2-methyl-1-phenyl-3-tosylpropan-1-one (3ja) and 1-(3,4-dimethylphenyl)-2-methyl-2-phenyl-3-tosylpropan-1-one (3ja')**

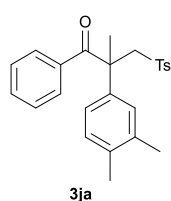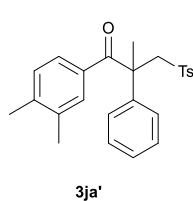

White solid, 76.2 mg, 75% yield, mp 132-137 °C.

**<sup>1</sup>H NMR** (400 MHz, CDCl<sub>3</sub>): First isomer: δ 7.41 (dt, *J* = 8.4, 2.0 Hz, 2H), 7.29-7.25 (m, 3H), 7.21-7.15 (overlapped, 4H), 7.08-7.05 (m, 3H), 3.93 (d, *J* = 14.8 Hz, 1H), 3.78 (d, *J* = 14.4 Hz, 1H), 2.29 (s, 3H), 2.10 (s, 3H), 2.00 (s, 3H), 1.97 (s, 3H). Second isomer: δ 7.46 (dt, *J* = 8.4, 2.0 Hz, 2H), 7.21-7.15 (overlapped, 1H), 7.14-7.10 (m, 3H), 6.98-6.90 (m, 3H), 6.88-6.80 (m, 3H), 3.95 (d, *J* = 14.4 Hz, 1H), 3.72 (d, *J* = 14.8 Hz, 1H), 2.29 (s, 3H), 2.09 (s, 3H), 2.05 (s, 3H), 2.03 (s, 3H).

**<sup>13</sup>C NMR** (101 MHz, CDCl<sub>3</sub>): First isomer: δ 201.46, 143.74, 139.77, 138.66, 137.38, 136.48, 136.36, 131.78, 130.50, 129.38, 129.18, 128.11, 127.62, 127.59, 127.08, 65.67, 53.22, 22.12, 21.62, 19.90, 19.45. Second isomer: δ 200.78, 143.95, 141.45, 138.82, 136.65, 136.49, 133.60, 130.86, 127.95, 129.62, 129.33, 127.87, 127.62, 126.78, 123.97, 65.79, 53.74, 22.26, 21.62, 19.87, 19.79.

HRMS (ESI) *m/z*: [M + Na]<sup>+</sup> Calcd for C<sub>25</sub>H<sub>26</sub>O<sub>3</sub>SNa 429.1495, found 429.1496.

**10-methyl-10-(tosylmethyl)phenanthren-9(10*H*)-one (3ka)**

White solid, 82.8 mg, 88% yield, mp 127-128 °C.

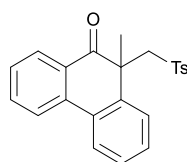

**<sup>1</sup>H NMR** (400 MHz, CDCl<sub>3</sub>): δ 8.09 (d, *J* = 8.0 Hz, 1H), 8.01 (d, *J* = 8.0 Hz, 2H), 7.62 (t, *J* = 8.0 Hz, 1H), 7.38-7.26 (m, 5H), 7.19-7.14 (m, 1H), 7.03 (d, *J* = 8.4 Hz, 2H), 4.51 (d, *J* = 14.4 Hz, 1H), 3.91 (d, *J* = 14.4 Hz, 1H), 2.26 (s, 3H), 1.35 (s, 3H).

**<sup>13</sup>C NMR** (101 MHz, CDCl<sub>3</sub>): δ 198.62, 144.26, 138.83, 137.84, 137.03, 134.89, 129.58, 129.31, 128.92, 128.51, 128.34, 128.11, 128.08, 127.93, 127.85, 124.02, 123.22, 64.83, 49.12, 30.78, 21.67.

HRMS (ESI) *m/z*: [M + Na]<sup>+</sup> Calcd for C<sub>23</sub>H<sub>20</sub>O<sub>3</sub>SNa 399.1025, found 399.1024.

### 1,2-diphenyl-3-tosylpropan-1-one (3la)<sup>15</sup>

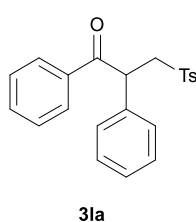

White solid, 56.5 mg, 62% yield.

**<sup>1</sup>H NMR** (400 MHz, CDCl<sub>3</sub>): δ 7.82 (d, *J* = 7.6 Hz, 2H), 7.62 (d, *J* = 8.0 Hz, 2H), 7.42 (t, *J* = 7.2 Hz, 1H), 7.31 (t, *J* = 7.6 Hz, 2H), 7.19-7.10 (m, 7H), 5.21 (dd, *J* = 8.8, 3.6 Hz, 1H), 4.34 (dd, *J* = 14.0, 8.8 Hz, 1H), 3.35 (dd, *J* = 14.0, 3.6 Hz, 1H), 2.31 (s, 3H).

**<sup>13</sup>C NMR** (101 MHz, CDCl<sub>3</sub>): δ 196.03, 144.86, 136.66, 136.54, 135.64, 133.58, 129.96, 129.53, 129.03, 128.74, 128.29, 128.26, 128.11, 59.46, 47.68, 21.76.

### 2-methyl-2-phenyl-1-(thiophen-2-yl)-3-tosylpropan-1-one (3ma)

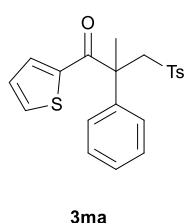

Colourless oil, 39.5 mg, 41% yield.

**<sup>1</sup>H NMR** (400 MHz, CDCl<sub>3</sub>): δ 7.39-7.35 (m, 3H), 7.18-7.12 (m, 5H), 7.06 (d, *J* = 8.4 Hz, 2H), 6.90 (dd, *J* = 4.0, 1.2 Hz, 1H), 6.76 (dd, *J* = 4.8, 4.0 Hz, 1H), 3.89 (d, *J* = 15.2 Hz, 1H), 3.83 (d, *J* = 14.8 Hz, 1H), 2.30 (s, 3H), 2.12 (s, 3H).

**<sup>13</sup>C NMR** (101 MHz, CDCl<sub>3</sub>): δ 193.81, 143.97, 140.51, 139.16, 138.53, 133.97, 133.51, 129.66, 129.01, 128.18, 127.78, 127.74, 127.60, 64.96, 53.80, 22.78, 21.69.

HRMS (ESI) *m/z*: [M + Na]<sup>+</sup> Calcd for C<sub>21</sub>H<sub>20</sub>O<sub>3</sub>S<sub>2</sub>Na 407.0746, found 407.0746.

### 2-methyl-1-phenyl-2-(thiophen-2-yl)-3-tosylpropan-1-one (3ma')

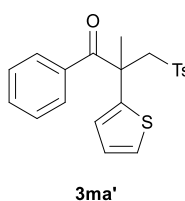

Colourless oil, 19.2 mg, 20% yield.

**<sup>1</sup>H NMR** (400 MHz, CDCl<sub>3</sub>): δ 7.61 (d, *J* = 8.0 Hz, 2H), 7.37-7.32 (m, 3H), 7.23-7.18 (m, 5H), 6.87 (d, *J* = 4.4 Hz, 1H), 6.83 (dd, *J* =

3.6, 1.2 Hz, 2H), 4.19 (d,  $J = 14.4$  Hz, 1H), 3.63 (d,  $J = 14.0$  Hz, 1H), 2.35 (s, 3H), 2.08 (s, 3H).

$^{13}\text{C}$  NMR (101 MHz,  $\text{CDCl}_3$ ):  $\delta$  200.73, 144.47, 138.70, 136.83, 131.78, 129.88, 128.78, 128.27, 127.81, 126.27, 126.06, 66.08, 51.74, 24.02, 21.76.

HRMS (ESI)  $m/z$ :  $[\text{M} + \text{Na}]^+$  Calcd for  $\text{C}_{21}\text{H}_{20}\text{O}_3\text{S}_2\text{Na}$  407.0746, found 407.0746.

### 3-methyl-3-phenyl-4-tosylbutan-2-one (3na)

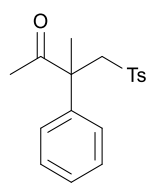

3na

Colourless oil, 64.9 mg, 82% yield.

$^1\text{H}$  NMR (400 MHz,  $\text{CDCl}_3$ ):  $\delta$  7.54 (dt,  $J = 8.0, 1.8$  Hz, 2H), 7.25-7.21 (m, 3H), 7.18 (d,  $J = 7.6$  Hz, 2H), 7.16-7.13 (m, 2H), 3.92 (d,  $J = 14.8$  Hz, 1H), 3.66 (d,  $J = 14.4$  Hz, 1H), 2.38 (s, 3H), 2.03 (s, 3H), 1.96 (s, 3H).

$^{13}\text{C}$  NMR (101 MHz,  $\text{CDCl}_3$ ):  $\delta$  207.44, 144.15, 138.57, 138.44, 129.70, 129.03, 127.85, 127.61, 126.56, 63.88, 54.26, 25.11, 21.63, 20.06.

HRMS (ESI)  $m/z$ :  $[\text{M} + \text{Na}]^+$  Calcd for  $\text{C}_{18}\text{H}_{20}\text{O}_3\text{SNa}$  339.1025, found 339.1024.

### 3-methyl-4-tosyl-3-(4-(trifluoromethyl)phenyl)butan-2-one (3oa)

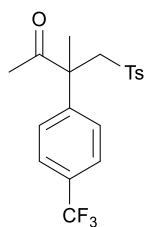

3oa

White solid, 63.4 mg, 66% yield, mp 89-91 °C.

$^1\text{H}$  NMR (400 MHz,  $\text{CDCl}_3$ ):  $\delta$  7.35 (t,  $J = 7.2$  Hz, 4H), 7.17 (d,  $J = 8.0$  Hz, 2H), 7.08 (d,  $J = 7.6$  Hz, 2H), 3.74 (dd,  $J = 16.4, 15.2$  Hz, 2H), 2.30 (s, 3H), 1.98 (s, 3H), 1.86 (s, 3H).

$^{13}\text{C}$  NMR (101 MHz,  $\text{CDCl}_3$ ):  $\delta$  206.82, 144.45, 142.09, 137.90, 129.79, 129.32 (q,  $J = 160.1$  Hz), 127.56, 127.38, 125.89 (q,  $J = 3.7$  Hz), 123.95 (q,  $J = 273.2$  Hz) 63.44, 54.31, 25.13, 21.58, 19.99.

HRMS (ESI)  $m/z$ :  $[\text{M} + \text{Na}]^+$  Calcd for  $\text{C}_{19}\text{H}_{19}\text{F}_3\text{O}_3\text{SNa}$  407.0899, found 407.0897.

### 1-cyclohexyl-2-methyl-2-phenyl-3-tosylpropan-1-one (3pa)

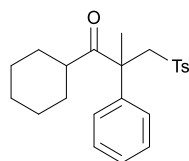

3pa

White solid, 81.7 mg, 85% yield, mp 92-94 °C.

$^1\text{H}$  NMR (400 MHz,  $\text{CDCl}_3$ ):  $\delta$  7.41 (d,  $J = 8.0$  Hz, 2H), 7.13-7.11 (m, 3H), 7.08 (s, 1H), 7.06-7.03 (m, 3H), 3.79 (d,  $J = 14.8$  Hz, 1H), 3.63 (d,  $J = 14.8$  Hz, 1H), 2.32-2.25 (m, 4H), 1.99 (s, 3H), 1.68-1.62

(m, 2H), 1.49-1.40 (m, 2H), 1.35-1.16 (m, 2H), 1.09-1.03 (m, 2H), 0.90-0.78 (m, 2H).

<sup>13</sup>C NMR (101 MHz, CDCl<sub>3</sub>): δ 212.34, 143.96, 138.55, 137.41, 129.63, 128.76, 127.82, 127.61, 127.17, 63.91, 54.45, 45.94, 30.92, 30.84, 25.65, 25.63, 25.56, 21.64, 19.16.

HRMS (ESI) m/z: [M + Na]<sup>+</sup> Calcd for C<sub>23</sub>H<sub>28</sub>O<sub>3</sub>SNa 407.1651, found 407.1649.

### 6-methyl-6-(tosylmethyl)-6,7,8,9-tetrahydro-5H-benzo[7]annulen-5-one (3qa)

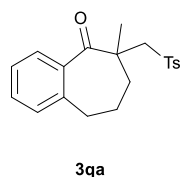

Colourless oil, 55.6 mg, 65% yield.

<sup>1</sup>H NMR (400 MHz, CDCl<sub>3</sub>): δ 7.68 (d, *J* = 8.0 Hz, 2H), 7.35-7.19 (m, 5H), 7.68 (d, *J* = 6.4 Hz, 1H), 3.46 (d, *J* = 14.0 Hz, 1H), 3.37 (d, *J* = 14.0 Hz, 1H), 2.78-2.71 (m, 1H), 2.69-2.62 (m, 1H), 2.36 (s, 3H),

2.21-2.13 (m, 1H), 1.93-1.84 (m, 1H), 1.37 (s, 3H).

<sup>13</sup>C NMR (101 MHz, CDCl<sub>3</sub>): δ 210.97, 144.67, 140.20, 138.83, 136.96, 131.19, 130.00, 128.69, 128.67, 127.73, 126.80, 63.97, 49.47, 35.08, 33.29, 22.93, 22.83, 21.74.

HRMS (ESI) m/z: [M + Na]<sup>+</sup> Calcd for C<sub>20</sub>H<sub>22</sub>O<sub>3</sub>SNa 365.1182, found 365.1182.

### 1-cyclopropyl-2-methyl-2-phenyl-3-tosylpropan-1-one (3ra) and 2-cyclopropyl-2-methyl-1-phenyl-3-tosylpropan-1-one (3ra')

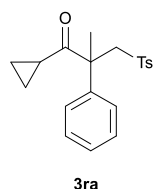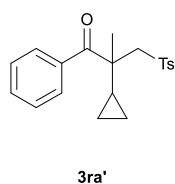

Colourless oil, 70.8 mg, 82% yield.

<sup>1</sup>H NMR (400 MHz, CDCl<sub>3</sub>): First isomer: δ 7.40-7.30 (overlapped, 2H), 7.15-7.12 (m, 3H), 7.07-7.04 (m, 4H), 3.79 (d, *J* = 14.8 Hz, 1H), 3.66 (d, *J* = 14.8

Hz, 1H), 2.28 (s, 3H), 2.00 (s, 3H), 1.55-1.49 (m, 1H), 0.89 (t, *J* = 4.4 Hz, 2H), 0.50-0.44 (m, 2H). Second isomer: δ 7.71-7.68 (m, 2H), 7.64-7.62 (m, 2H), 7.40-7.30 (overlapped, 3H), 7.25 (d, *J* = 8.4 Hz, 2H), 3.87 (d, *J* = 13.6 Hz, 1H), 3.45 (d, *J* = 14.0 Hz, 1H), 2.36 (s, 3H), 1.22 (s, 3H), 1.16-1.12 (m, 1H), 0.78-0.73 (m, 1H), 0.56-0.52 (m, 2H), 0.36-0.31 (m, 1H).

<sup>13</sup>C NMR (101 MHz, CDCl<sub>3</sub>) First isomer: δ 209.90, 143.92, 139.38, 138.74, 129.92, 129.59, 128.84, 127.72, 127.68, 63.79, 54.31, 21.61, 20.33, 17.40, 11.46, 2.41.

Second isomer:  $\delta$  207.08, 144.49, 138.92, 138.44, 130.70, 128.04, 127.76, 127.56, 127.20, 65.64, 49.53, 21.71, 19.31, 18.70, 12.73, 3.19.

HRMS (ESI)  $m/z$ :  $[M + Na]^+$  Calcd for  $C_{20}H_{22}O_3SNa$  365.1182, found 365.1181.

### 2-methyl-2-(tosylmethyl)cyclopentan-1-one (3sa)

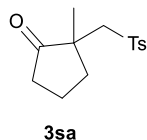

3sa

Colourless oil, 48.6 mg, 73% yield.

$^1H$  NMR (400 MHz,  $CDCl_3$ ):  $\delta$  7.70 (d,  $J = 8.4$  Hz, 2H), 7.27 (d,  $J = 8.0$  Hz, 2H), 3.24 (s, 2H), 2.50-2.42 (m, 1H), 2.37 (s, 3H), 2.33-2.23 (m, 2H), 2.06-1.97 (m, 2H), 1.90-1.79 (m, 1H), 1.08 (s, 3H).

$^{13}C$  NMR (101 MHz,  $CDCl_3$ ):  $\delta$  219.60, 144.84, 138.46, 130.05, 127.78, 62.51, 47.27, 36.28, 34.36, 22.41, 21.77, 18.90.

HRMS (ESI)  $m/z$ :  $[M + Na]^+$  Calcd for  $C_{14}H_{18}O_3SNa$  289.0869, found 289.0870.

### 2-methyl-2-(tosylmethyl)cyclohexan-1-one (3ta)

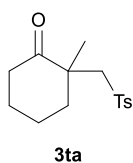

3ta

Colourless oil, 51.9 mg, 74% yield.

$^1H$  NMR (400 MHz,  $CDCl_3$ ):  $\delta$  7.72 (d,  $J = 8.4$  Hz, 2H), 7.27 (d,  $J = 8.0$  Hz, 2H), 3.45 (d,  $J = 14.4$  Hz, 1H), 3.27 (d,  $J = 14.4$  Hz, 1H), 2.49-2.40 (m, 1H), 2.37-2.32 (m, 4H), 2.13-2.10 (m, 2H), 1.94-1.86 (m, 1H), 1.77-1.68 (m, 3H), 1.30 (s, 3H)

$^{13}C$  NMR (101 MHz,  $CDCl_3$ ):  $\delta$  212.13, 144.58, 139.02, 129.94, 127.73, 63.47, 48.67, 38.06, 37.73, 26.60, 23.30, 21.72, 21.05.

HRMS (ESI)  $m/z$ :  $[M + Na]^+$  Calcd for  $C_{15}H_{20}O_3SNa$  303.1025, found 303.1025.

### 2-methyl-2-(tosylmethyl)cycloheptan-1-one (3ua)

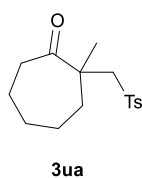

3ua

Colourless oil, 52.2 mg, 71% yield.

$^1H$  NMR (400 MHz,  $CDCl_3$ ):  $\delta$  7.70 (d,  $J = 8.4$  Hz, 2H), 7.27 (d,  $J = 7.6$  Hz, 2H), 3.30 (dd,  $J = 18.8, 14.4$  Hz, 2H), 2.66-2.60 (m, 1H), 2.56-2.47 (m, 2H), 2.37 (s, 3H), 1.69 (dd,  $J = 14.4, 8.8$  Hz, 1H), 1.63-1.52 (m, 5H), 1.46-1.39 (m, 1H), 1.27 (s, 3H).

$^{13}C$  NMR (101 MHz,  $CDCl_3$ ):  $\delta$  214.88, 144.69, 138.81, 130.01, 127.77, 63.24, 50.74, 40.83, 35.22, 30.47, 25.91, 24.54, 24.21, 21.76.

HRMS (ESI)  $m/z$ :  $[M + Na]^+$  Calcd for  $C_{16}H_{22}O_3SNa$  317.1182, found 317.1181.

### 2-methyl-2-(tosylmethyl)cyclooctan-1-one (3va)

Colourless oil, 51.7 mg, 67% yield.

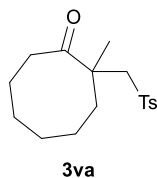

$^1H$  NMR (400 MHz,  $CDCl_3$ ):  $\delta$  7.72 (d,  $J = 8.4$  Hz, 2H), 7.27 (d,  $J = 7.6$  Hz, 2H), 3.49 (d,  $J = 14.8$  Hz, 1H), 3.08 (d,  $J = 14.4$  Hz, 1H), 2.71 (td,  $J = 11.6, 3.2$  Hz, 1H), 2.37-2.30 (m, 4H), 2.18-2.05 (m, 2H), 1.84-1.76 (m, 1H), 1.71-1.58 (m, 3H), 1.55-1.42 (m, 2H), 1.37 (s, 3H), 1.31-1.21 (m, 1H), 0.84-0.74 (m, 1H).

$^{13}C$  NMR (101 MHz,  $CDCl_3$ ):  $\delta$  217.48, 144.62, 139.07, 129.99, 127.69, 59.12, 50.56, 35.86, 32.45, 30.16, 26.18, 25.03, 24.37, 22.66, 21.72.

HRMS (ESI)  $m/z$ :  $[M + Na]^+$  Calcd for  $C_{17}H_{24}O_3SNa$  331.1338, found 331.1339.

### 2-methyl-2-(tosylmethyl)cyclononan-1-one (3wa)

Colourless oil, 52.4 mg, 65% yield.

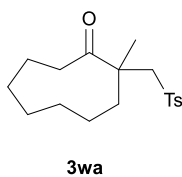

$^1H$  NMR (400 MHz,  $CDCl_3$ ):  $\delta$  7.72 (d,  $J = 8.4$  Hz, 2H), 7.27 (d,  $J = 7.6$  Hz, 2H), 3.46 (d,  $J = 14.4$  Hz, 1H), 3.14 (d,  $J = 14.4$  Hz, 1H), 2.85-2.78 (m, 1H), 2.37 (s, 3H), 2.23-2.17 (m, 1H), 2.06-1.99 (m, 1H), 1.80-1.65 (m, 3H), 1.50-1.43 (m, 4H), 1.37-1.30 (m, 4H), 1.29-1.22 (m, 2H), 1.16-1.08 (m, 1H).

$^{13}C$  NMR (101 MHz,  $CDCl_3$ ):  $\delta$  215.23, 144.59, 139.09, 129.98, 127.70, 61.07, 51.99, 34.20, 33.69, 25.31, 24.62, 23.16, 22.38, 21.73, 21.27, 20.29.

HRMS (ESI)  $m/z$ :  $[M + Na]^+$  Calcd for  $C_{18}H_{26}O_3SNa$  345.1495, found 345.1496.

### 2-methyl-2-(tosylmethyl)cyclotridecan-1-one (3xa)

White solid, 56.8 mg, 60% yield, mp 112-114 °C.

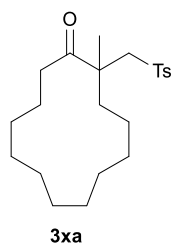

$^1H$  NMR (400 MHz,  $CDCl_3$ ):  $\delta$  7.68 (d,  $J = 8.4$  Hz, 2H), 7.26 (d,  $J = 8.4$  Hz, 2H), 3.83 (d,  $J = 14.0$  Hz, 1H), 2.94 (d,  $J = 13.6$  Hz, 1H), 2.80-2.72 (m, 1H), 2.53-2.46 (m, 1H), 2.36 (s, 3H), 2.01-1.94 (m, 1H), 1.61 (s, 3H), 1.48-1.39 (m, 2H), 1.31-1.05 (m, 17H).

<sup>13</sup>C NMR (101 MHz, CDCl<sub>3</sub>): δ 212.95, 144.53, 138.92, 129.96, 127.73, 64.42, 50.21, 40.68, 37.03, 26.81, 26.36, 26.20, 25.22, 24.71, 23.81, 23.23, 21.87, 21.76, 20.95, 20.62.

HRMS (ESI) m/z: [M + Na]<sup>+</sup> Calcd for C<sub>22</sub>H<sub>34</sub>O<sub>3</sub>SNa 401.2121, found 401.2123.

#### 4-methyl-4-(tosylmethyl)hexan-3-one (3ya)

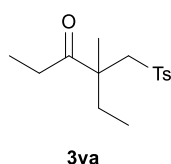

Colourless oil, 48.0 mg, 68% yield.

<sup>1</sup>H NMR (400 MHz, CDCl<sub>3</sub>): δ 7.69 (d, *J* = 8.4 Hz, 2H), 7.27 (d, *J* = 8.4 Hz, 2H), 3.66 (d, *J* = 14.0 Hz, 1H), 3.10 (d, *J* = 14.0 Hz, 1H), 2.66-2.57 (m, 1H), 2.50-2.42 (m, 1H), 2.37 (s, 3H), 1.67-1.60 (m, 1H),

1.54-1.47 (m, 4H), 1.00 (t, *J* = 7.2 Hz, 3H), 0.74 (t, *J* = 7.2 Hz, 3H).

<sup>13</sup>C NMR (101 MHz, CDCl<sub>3</sub>): δ 213.37, 144.60, 138.81, 129.98, 127.78, 63.17, 50.34, 32.62, 31.46, 21.75, 20.80, 8.54, 7.90.

HRMS (ESI) m/z: [M + Na]<sup>+</sup> Calcd for C<sub>15</sub>H<sub>22</sub>O<sub>3</sub>SNa 305.1182, found 305.1184.

#### 5-methyl-5-(tosylmethyl)octan-4-one (3za)

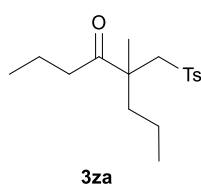

Colourless oil, 50.4 mg, 65% yield.

<sup>1</sup>H NMR (400 MHz, CDCl<sub>3</sub>): δ 7.69 (d, *J* = 8.0 Hz, 2H), 7.26 (d, *J* = 8.0 Hz, 2H), 3.64 (d, *J* = 14.0 Hz, 1H), 3.11 (d, *J* = 14.0 Hz, 1H), 2.60-2.52 (m, 1H), 2.44-2.39 (m, 1H), 2.37 (s, 3H), 1.61-1.52 (m,

3H), 1.49 (s, 3H), 1.44-1.36 (m, 1H), 1.16-1.06 (m, 2H), 0.86 (t, *J* = 7.2 Hz, 3H), 0.79 (t, *J* = 7.2 Hz, 3H).

<sup>13</sup>C NMR (101 MHz, CDCl<sub>3</sub>): δ 212.69, 144.57, 138.86, 129.97, 127.76, 63.18, 50.25, 41.90, 39.93, 21.76, 21.33, 17.43, 16.99, 14.52, 13.84.

HRMS (ESI) m/z: [M + Na]<sup>+</sup> Calcd for C<sub>17</sub>H<sub>26</sub>O<sub>3</sub>SNa 333.1495, found 333.1497.

#### 2-methyl-1,2-diphenyl-3-(phenylsulfonyl)propan-1-one (3ab)

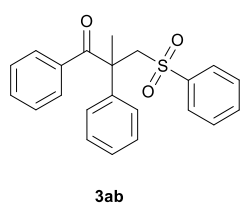

White solid, 78.4 mg, 86% yield, mp 109-111 °C.

<sup>1</sup>H NMR (400 MHz, CDCl<sub>3</sub>): δ 7.59 (d, *J* = 8.0 Hz, 2H), 7.43 (t, *J* = 7.2 Hz, 1H), 7.33 (d, *J* = 6.4 Hz, 2H), 7.29-7.24 (m, 3H), 7.22-7.17 (m, 5H), 7.13 (t, *J* = 8.0 Hz, 2H), 3.99 (d, *J* = 14.4 Hz,

1H), 3.76 (d, *J* = 14.4 Hz, 1H), 2.04 (s, 3H).



<sup>13</sup>C NMR (101 MHz, CDCl<sub>3</sub>): δ 201.19, 141.58, 139.25, 136.19, 133.19, 131.98, 129.35, 129.10, 128.21, 128.15, 127.58, 126.76, 65.60, 53.75, 22.20.

HRMS (ESI) m/z: [M + Na]<sup>+</sup> Calcd for C<sub>22</sub>H<sub>20</sub>O<sub>3</sub>SNa 387.1025, found 387.1025.

### 3-((4-(*tert*-butyl)phenyl)sulfonyl)-2-methyl-1,2-diphenylpropan-1-one (3ac)

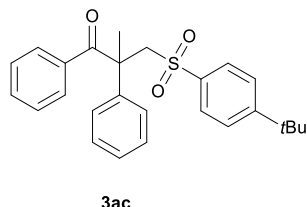

Colourless oil, 96.7 mg, 92% yield.

<sup>1</sup>H NMR (400 MHz, CDCl<sub>3</sub>): δ 7.49 (dt, *J* = 8.4, 2.0 Hz, 2H), 7.30 (dt, *J* = 8.8, 2.0 Hz, 2H), 7.27-7.09 (m, 10H), 3.97 (d, *J* = 14.8 Hz, 1H), 3.77 (d, *J* = 14.8 Hz, 1H), 2.03 (s, 3H), 1.22 (s, 9H).

<sup>13</sup>C NMR (101 MHz, CDCl<sub>3</sub>): δ 201.19, 156.86, 139.21, 138.46, 136.22, 131.90, 129.31, 129.26, 128.15, 128.04, 127.43, 126.77, 126.05, 65.44, 53.66, 35.20, 31.14, 22.14.

HRMS (ESI) m/z: [M + Na]<sup>+</sup> Calcd for C<sub>26</sub>H<sub>28</sub>O<sub>3</sub>SNa 443.1651, found 443.1651.

### 3-((4-methoxyphenyl)sulfonyl)-2-methyl-1,2-diphenylpropan-1-one (3ad)

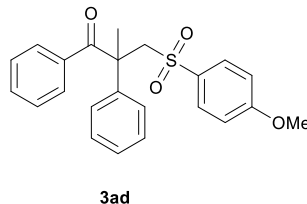

Colourless oil, 51.3 mg, 52% yield.

<sup>1</sup>H NMR (400 MHz, CDCl<sub>3</sub>): δ 7.52 (dt, *J* = 8.4, 2.0 Hz, 2H), 7.32-7.28 (m, 1H), 7.26 (s, 1H), 7.24-7.19 (m, 6H), 7.17-7.13 (m, 2H), 6.79 (dt, *J* = 10.0, 2.4 Hz, 2H), 3.99 (d, *J* = 14.4 Hz, 1H), 3.77 (s, 3H), 3.72 (d, *J* = 14.4 Hz, 1H), 2.03 (s, 3H).

<sup>13</sup>C NMR (101 MHz, CDCl<sub>3</sub>): δ 201.37, 163.40, 139.56, 136.39, 133.46, 131.95, 129.84, 129.40, 129.36, 128.23, 128.11, 126.80, 114.32, 65.86, 55.81, 53.82, 22.28.

HRMS (ESI) m/z: [M + Na]<sup>+</sup> Calcd for C<sub>23</sub>H<sub>22</sub>O<sub>4</sub>SNa 417.1131, found 417.1133.

### 3-((4-fluorophenyl)sulfonyl)-2-methyl-1,2-diphenylpropan-1-one (3ae)

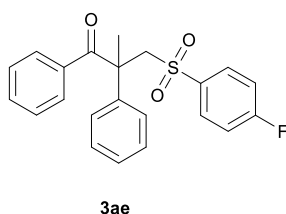

Colourless oil, 92.7 mg, 97% yield.

<sup>1</sup>H NMR (400 MHz, CDCl<sub>3</sub>): δ 7.60-7.57 (m, 2H), 7.30 (t, *J* = 7.2 Hz, 1H), 7.25 (d, *J* = 8.4 Hz, 2H), 7.20 (s, 5H), 7.14 (t, *J* = 8.0 Hz, 2H), 6.98 (t, *J* = 8.4 Hz, 2H), 3.97 (d, *J* = 14.4 Hz,

1H), .3.79 (d,  $J = 14.8$  Hz, 1H), 2.04 (s, 3H).

$^{13}\text{C}$  NMR (101 MHz,  $\text{CDCl}_3$ ):  $\delta$  201.14, 164.47 (d,  $J = 256.5$  Hz), 139.08, 137.66 (d,  $J = 3.1$  Hz), 136.04, 132.12, 130.51 (d,  $J = 9.7$  Hz), 129.43, 129.41, 128.28, 128.26, 126.87, 116.32 (d,  $J = 22.6$  Hz), 65.90, 53.80, 22.13.

HRMS (ESI)  $m/z$ :  $[\text{M} + \text{Na}]^+$  Calcd for  $\text{C}_{22}\text{H}_{19}\text{FO}_3\text{SNa}$  405.0931, found 405.0932.

### 3-((4-chlorophenyl)sulfonyl)-2-methyl-1,2-diphenylpropan-1-one (3af)

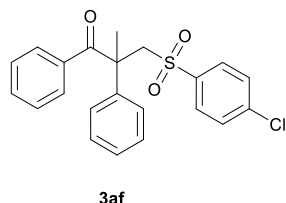

White solid, 85.8 mg, 86% yield, mp 89-91 °C.

$^1\text{H}$  NMR (400 MHz,  $\text{CDCl}_3$ ):  $\delta$  7.49 (dt,  $J = 8.4, 2.4$  Hz, 2H), 7.31-7.23 (m, 5H), 7.19 (s, 5H), 7.14 (t,  $J = 8.0$  Hz, 2H), 3.96 (d,  $J = 14.8$  Hz, 1H), .3.79 (d,  $J = 14.4$  Hz, 1H), 2.03 (s, 3H).

$^{13}\text{C}$  NMR (101 MHz,  $\text{CDCl}_3$ ):  $\delta$  201.03, 139.93, 139.81, 138.98, 135.94, 132.10, 129.40, 129.38, 129.33, 129.12, 128.24, 128.22, 126.83, 65.80, 53.75, 22.10.

HRMS (ESI)  $m/z$ :  $[\text{M} + \text{Na}]^+$  Calcd for  $\text{C}_{22}\text{H}_{19}\text{ClO}_3\text{SNa}$  421.0636, found 421.0635.

### 3-((4-bromophenyl)sulfonyl)-2-methyl-1,2-diphenylpropan-1-one (3ag)

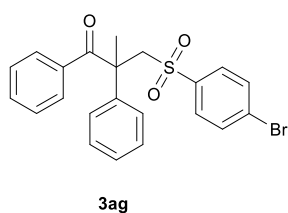

White solid, 92.0 mg, 83% yield, mp 109-111 °C.

$^1\text{H}$  NMR (400 MHz,  $\text{CDCl}_3$ ):  $\delta$  7.47-7.41 (m, 4H), 7.31 (t,  $J = 7.6$  Hz, 1H), 7.25 (d,  $J = 8.0$  Hz, 2H), 7.20 (s, 5H), 7.15 (t,  $J = 7.6$  Hz, 2H), 3.96 (d,  $J = 14.8$  Hz, 1H), .3.80 (d,  $J = 14.4$  Hz,

1H), 2.04 (s, 3H).

$^{13}\text{C}$  NMR (101 MHz,  $\text{CDCl}_3$ ):  $\delta$  201.10, 140.51, 139.02, 135.99, 132.38, 132.17, 129.47, 129.44, 129.25, 128.48, 128.30, 128.28, 126.90, 65.86, 53.81, 22.13.

HRMS (ESI)  $m/z$ :  $[\text{M} + \text{Na}]^+$  Calcd for  $\text{C}_{22}\text{H}_{19}\text{BrO}_3\text{SNa}$  465.0130, found 465.0130.

### 3-((4-iodophenyl)sulfonyl)-2-methyl-1,2-diphenylpropan-1-one (3ah)

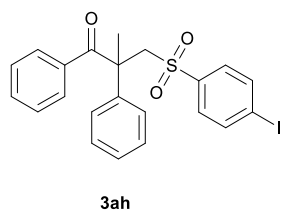

White solid, 90.7 mg, 74% yield, mp 96-97 °C.

$^1\text{H}$  NMR (400 MHz,  $\text{CDCl}_3$ ):  $\delta$  7.66 (dt,  $J = 8.4, 2.0$  Hz, 2H), 7.33-7.23 (m, 5H), 7.21-7.18 (m, 5H), 7.15 (t,  $J = 8.0$  Hz, 2H), 3.95 (d,  $J = 14.8$  Hz, 1H), .3.79 (d,  $J = 14.8$  Hz, 1H), 2.03 (s, 3H).

<sup>13</sup>C NMR (101 MHz, CDCl<sub>3</sub>): δ 201.06, 141.14, 139.01, 138.34, 136.00, 132.13, 129.46, 129.42, 129.06, 128.28, 128.24, 126.88, 101.05, 65.79, 53.78, 22.12.

HRMS (ESI) m/z: [M + Na]<sup>+</sup> Calcd for C<sub>22</sub>H<sub>19</sub>IO<sub>3</sub>SNa 512.9992, found 512.9990.

### 2-methyl-1,2-diphenyl-3-((4-(trifluoromethyl)phenyl)sulfonyl)propan-1-one (3ai)

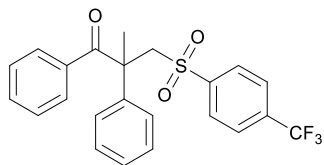

3ai

White solid, 103.7 mg, 96% yield, mp 87-89 °C.

<sup>1</sup>H NMR (400 MHz, CDCl<sub>3</sub>): δ 7.67 (d, *J* = 8.4 Hz, 2H), 7.56 (d, *J* = 8.4 Hz, 2H), 7.33-7.29 (m, 1H), 7.27-7.23 (m, 2H), 7.16-7.13 (m, 7H), 3.96 (d, *J* = 14.8 Hz, 1H), 3.89 (d,

*J* = 14.8 Hz, 1H), 2.06 (s, 3H).

<sup>13</sup>C NMR (101 MHz, CDCl<sub>3</sub>): δ 200.94, 144.76, 138.66, 135.78, 134.71 (q, *J* = 22.6 Hz), 132.26, 129.48, 129.43, 128.40, 128.32, 128.28, 126.97, 126.18 (q, *J* = 3.7 Hz), 123.31 (q, *J* = 274.2 Hz), 65.75, 53.78, 22.05.

HRMS (ESI) m/z: [M + Na]<sup>+</sup> Calcd for C<sub>23</sub>H<sub>19</sub>F<sub>3</sub>O<sub>3</sub>SNa 455.0899, found 455.0899.

### 2-methyl-1,2-diphenyl-3-((4-(trifluoromethoxy)phenyl)sulfonyl)propan-1-one (3aj)

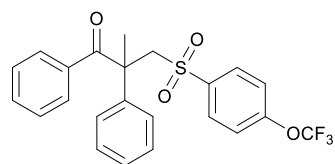

3aj

White solid, 95.3 mg, 85% yield, mp 99-101 °C.

<sup>1</sup>H NMR (400 MHz, CDCl<sub>3</sub>): δ 7.58 (dt, *J* = 8.8, 2.8 Hz, 2H), 7.30 (t, *J* = 7.2 Hz, 1H), 7.25-7.23 (m, 2H), 7.19-7.15 (m, 6H), 7.12 (t, *J* = 8.4 Hz, 3H), 3.94 (d, *J* = 14.8

Hz, 1H), 3.87 (d, *J* = 15.2 Hz, 1H), 2.05 (s, 3H).

<sup>13</sup>C NMR (101 MHz, CDCl<sub>3</sub>): δ 201.04, 152.46, 139.74, 138.75, 135.88, 132.19, 129.91, 129.46, 129.40, 128.31, 128.30, 126.99, 120.98, 120.36 (q, *J* = 260.4 Hz), 65.81, 53.75, 22.06.

HRMS (ESI) m/z: [M + Na]<sup>+</sup> Calcd for C<sub>23</sub>H<sub>19</sub>F<sub>3</sub>O<sub>4</sub>SNa 471.0848, found 471.0848.

### 4-((2-methyl-3-oxo-2,3-diphenylpropyl)sulfonyl)benzonitrile (3ak)

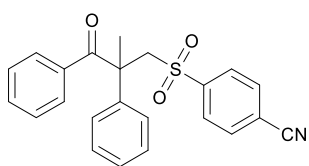

3ak

White solid, 79.8 mg, 82% yield, mp 139-140 °C.

<sup>1</sup>H NMR (400 MHz, CDCl<sub>3</sub>): δ 7.66 (d, *J* = 8.4 Hz, 2H), 7.59 (d, *J* = 8.4 Hz, 2H), 7.31 (t, *J* = 7.6 Hz, 1H), 7.25 (d, *J*

= 8.0 Hz, 2H), 7.17-7.12 (m, 7H), 3.95 (d,  $J = 14.8$  Hz, 1H), 3.88 (d,  $J = 13.2$  Hz, 1H), 2.05 (s, 3H).

$^{13}\text{C}$  NMR (101 MHz,  $\text{CDCl}_3$ ):  $\delta$  200.81, 145.37, 138.64, 135.60, 132.76, 132.30, 129.44, 128.42, 128.33, 128.31, 126.95, 117.35, 116.73, 65.86, 53.80, 22.01.

HRMS (ESI)  $m/z$ :  $[\text{M} + \text{Na}]^+$  Calcd for  $\text{C}_{23}\text{H}_{19}\text{NO}_3\text{SNa}$  412.0978, found 412.0984.

### 3-([1,1'-biphenyl]-4-ylsulfonyl)-2-methyl-1,2-diphenylpropan-1-one (3al)

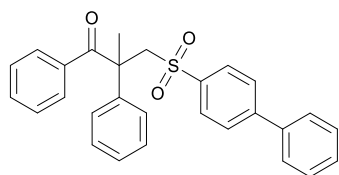

3al

White solid, 41.8 mg, 38% yield, mp 58-60 °C.

$^1\text{H}$  NMR (400 MHz,  $\text{CDCl}_3$ ):  $\delta$  7.63 (dt,  $J = 8.4, 2.0$  Hz, 2H), 7.52-7.47 (m, 4H), 7.42-7.37 (m, 2H), 7.36-7.33 (m, 1H), 7.32-7.17 (m, 8H), 7.16-7.12 (m, 2H), 4.02 (d,  $J =$

14.8 Hz, 1H), 3.83 (d,  $J = 14.4$  Hz, 1H), 2.06 (s, 3H).

$^{13}\text{C}$  NMR (101 MHz,  $\text{CDCl}_3$ ):  $\delta$  201.24, 146.11, 140.05, 139.48, 139.26, 136.20, 132.03, 129.41, 129.39, 129.22, 128.70, 128.25, 128.18, 128.13, 127.76, 127.50, 126.88, 65.72, 53.80, 22.23.

HRMS (ESI)  $m/z$ :  $[\text{M} + \text{Na}]^+$  Calcd for  $\text{C}_{28}\text{H}_{24}\text{O}_3\text{SNa}$  463.1338, found 463.1339.

### 2-methyl-1,2-diphenyl-3-(*o*-tolylsulfonyl)propan-1-one (3am)

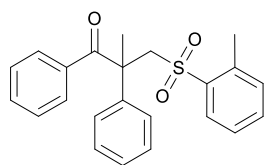

3am

Colourless oil, 73.8 mg, 78% yield.

$^1\text{H}$  NMR (400 MHz,  $\text{CDCl}_3$ ):  $\delta$  7.63 (dd,  $J = 8.4, 0.8$  Hz, 1H), 7.33-7.26 (m, 2H), 7.25-7.17 (m, 7H), 7.14-7.10 (m, 4H), 3.99 (d,  $J = 14.4$  Hz, 1H), 3.74 (d,  $J = 14.4$  Hz, 1H), 2.53 (s, 3H),

2.03 (s, 3H).

$^{13}\text{C}$  NMR (101 MHz,  $\text{CDCl}_3$ ):  $\delta$  201.26, 139.53, 139.49, 137.66, 136.24, 133.35, 132.60, 131.96, 129.75, 129.35, 129.33, 128.21, 128.16, 126.66, 126.56, 64.49, 53.73, 22.28, 20.42.

HRMS (ESI)  $m/z$ :  $[\text{M} + \text{Na}]^+$  Calcd for  $\text{C}_{23}\text{H}_{22}\text{O}_3\text{SNa}$  401.1182, found 401.1182.

### 2-methyl-1,2-diphenyl-3-(*m*-tolylsulfonyl)propan-1-one (3an)

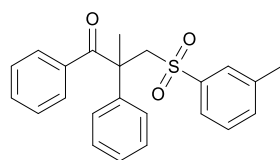

3an

White solid, 81.4 mg, 86% yield, mp 99-101 °C.

**<sup>1</sup>H NMR** (400 MHz, CDCl<sub>3</sub>): δ 7.42 (dt, *J* = 6.8, 2.0 Hz, 1H), 7.32-7.12 (m, 13H), 3.96 (d, *J* = 14.8 Hz, 1H), 3.79 (d, *J* = 14.4 Hz, 1H), 2.26 (s, 3H), 2.04 (s, 3H).

**<sup>13</sup>C NMR** (101 MHz, CDCl<sub>3</sub>): δ 201.27, 141.45, 139.29, 136.27, 134.04, 132.00, 129.42, 129.28, 129.02, 128.25, 128.13, 127.98, 126.87, 124.72, 65.58, 53.76, 22.31, 21.41.

HRMS (ESI) *m/z*: [M + Na]<sup>+</sup> Calcd for C<sub>23</sub>H<sub>22</sub>O<sub>3</sub>SNa 401.1182, found 401.1180.

### 3-((3,4-dimethylphenyl)sulfonyl)-2-methyl-1,2-diphenylpropan-1-one (3ao)

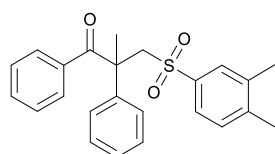

3ao

White solid, 85.4 mg, 87% yield, mp 135-136 °C.

**<sup>1</sup>H NMR** (400 MHz, CDCl<sub>3</sub>): δ 7.35 (dd, *J* = 8.0, 2.0 Hz, 1H), 7.30 (t, *J* = 7.6 Hz, 1H), 7.26-7.24 (m, 3H), 7.22-7.19 (m, 5H), 7.15 (t, *J* = 8.0 Hz, 2H), 7.09 (d, *J* = 8.0 Hz, 1H), 3.97 (d, *J* =

14.8 Hz, 1H), 3.75 (d, *J* = 14.4 Hz, 1H), 2.21 (s, 3H), 2.16 (s, 3H), 2.03 (s, 3H).

**<sup>13</sup>C NMR** (101 MHz, CDCl<sub>3</sub>): δ 201.31, 142.86, 139.52, 138.88, 137.78, 136.38, 131.92, 130.24, 129.39, 129.25, 128.46, 128.21, 128.00, 126.82, 125.14, 65.64, 53.77, 22.36, 20.08, 19.88.

HRMS (ESI) *m/z*: [M + Na]<sup>+</sup> Calcd for C<sub>24</sub>H<sub>24</sub>O<sub>3</sub>SNa 415.1338, found 415.1335.

### 3-((2,5-dichlorophenyl)sulfonyl)-2-methyl-1,2-diphenylpropan-1-one (3ap)

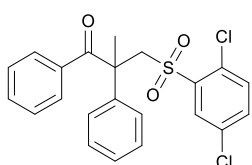

3ap

White solid, 81.3 mg, 75% yield, mp 143-145 °C.

**<sup>1</sup>H NMR** (400 MHz, CDCl<sub>3</sub>): δ 7.39-7.38 (m, 1H), 7.36-7.33 (m, 3H), 7.30-7.26 (m, 2H), 7.25-7.21 (m, 3H), 7.19 (s, 1H), 7.17-7.14 (m, 3H), 4.70 (d, *J* = 15.6 Hz, 1H), 3.89 (d, *J* = 15.6 Hz,

1H), 2.10 (s, 3H).

**<sup>13</sup>C NMR** (101 MHz, CDCl<sub>3</sub>): δ 200.60, 139.43, 137.71, 135.28, 133.91, 133.49, 132.46, 132.37, 131.09, 130.31, 129.74, 129.06, 128.67, 128.31, 127.10, 63.36, 53.59, 22.44.

HRMS (ESI) *m/z*: [M + Na]<sup>+</sup> Calcd for C<sub>22</sub>H<sub>18</sub>Cl<sub>2</sub>O<sub>3</sub>SNa 455.0246, found 455.0248.

### 2-methyl-3-(naphthalen-1-ylsulfonyl)-1,2-diphenylpropan-1-one (3aq)

White solid, 63.2mg, 61% yield, mp 83-85 °C.

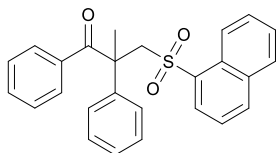

3aq

**<sup>1</sup>H NMR** (400 MHz, CDCl<sub>3</sub>): δ 8.51 (d, *J* = 8.4 Hz, 1H), 7.90 (t, *J* = 7.6 Hz, 2H), 7.80 (d, *J* = 8.0 Hz, 1H), 7.58-7.54 (m, 1H), 7.51-7.47 (m, 1H), 7.34-7.24 (m, 4H), 7.14-7.08 (m, 7H), 4.14 (d, *J* = 14.8 Hz, 1H), 3.98 (d, *J* = 14.8 Hz, 1H), 2.09 (s, 3H).

**<sup>13</sup>C NMR** (101 MHz, CDCl<sub>3</sub>): δ 201.17, 139.21, 136.22, 136.13, 134.88, 134.15, 132.01, 130.17, 129.45, 129.23, 129.14, 128.79, 128.52, 128.23, 128.09, 126.95, 126.72, 124.49, 124.25, 64.68, 53.87, 22.45.

HRMS (ESI) *m/z*: [M + Na]<sup>+</sup> Calcd for C<sub>26</sub>H<sub>22</sub>O<sub>3</sub>SNa 437.1182, found 437.1181.

### 2-methyl-3-(naphthalen-2-ylsulfonyl)-1,2-diphenylpropan-1-one (3ar)

Colourless oil, 56.0 mg, 54% yield.

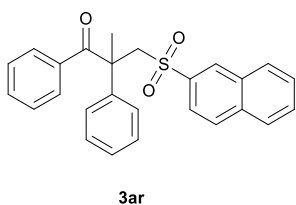

**<sup>1</sup>H NMR** (400 MHz, CDCl<sub>3</sub>): δ 8.12 (d, *J* = 1.6 Hz, 1H), 7.87-7.84 (m, 3H), 7.69 (dd, *J* = 8.8, 2.0 Hz, 1H), 7.65-7.55 (m, 2H), 7.39-7.32 (m, 3H), 7.30-7.26 (m, 2H), 7.22-7.15 (m, 4H), 7.10-7.06 (m, 1H), 4.12 (d, *J* = 14.4 Hz, 1H), 3.96 (d, *J* = 14.8 Hz, 1H), 2.15 (s, 3H).

**<sup>13</sup>C NMR** (101 MHz, CDCl<sub>3</sub>): δ 201.21, 139.08, 138.32, 136.19, 135.09, 132.13, 132.01, 129.61, 129.45, 129.42, 129.41, 129.24, 129.17, 128.24, 128.19, 127.99, 127.56, 126.82, 122.45, 65.45, 53.81, 22.32.

HRMS (ESI) *m/z*: [M + Na]<sup>+</sup> Calcd for C<sub>26</sub>H<sub>22</sub>O<sub>3</sub>SNa 437.1182, found 437.1180.

### 2-methyl-1,2-diphenyl-3-(thiophen-2-ylsulfonyl)propan-1-one (3as)

Colourless oil, 52.8 mg, 57% yield.

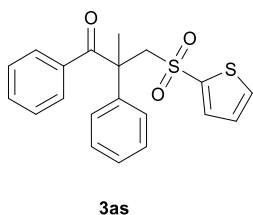

**<sup>1</sup>H NMR** (400 MHz, CDCl<sub>3</sub>): δ 7.50 (dd, *J* = 7.2, 1.6 Hz, 1H), 7.32-7.27 (m, 3H), 7.26-7.24 (m, 5H), 7.23-7.20 (m, 1H), 7.16-7.13 (m, 2H), 6.89 (dd, *J* = 5.2, 4.0 Hz, 1H), 4.10 (d, *J* = 14.8 Hz, 1H), 3.89 (d, *J* = 14.8 Hz, 1H), 2.04 (s, 3H).

**<sup>13</sup>C NMR** (101 MHz, CDCl<sub>3</sub>): δ 201.05, 142.99, 139.22, 136.04, 133.70, 133.61, 132.10, 129.46, 129.44, 128.26, 128.24, 127.72, 126.85, 67.17, 53.97, 22.13.

HRMS (ESI) *m/z*: [M + Na]<sup>+</sup> Calcd for C<sub>20</sub>H<sub>18</sub>O<sub>3</sub>S<sub>2</sub>Na 393.0590, found 393.0588.

### 2-methyl-3-(methylsulfonyl)-1,2-diphenylpropan-1-one (3at)

White solid, 64.3 mg, 85% yield, mp 118-120 °C.

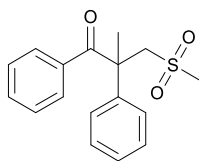

3at

**<sup>1</sup>H NMR** (400 MHz, CDCl<sub>3</sub>): δ 7.46-7.36 (m, 8H), 7.26-7.23 (m, 2H), 3.75 (dd, *J* = 17.2, 15.2 Hz, 2H), 2.37 (s, 3H), 2.08 (s, 3H).

**<sup>13</sup>C NMR** (101 MHz, CDCl<sub>3</sub>): δ 201.16, 139.44, 135.42, 132.43, 129.82, 129.74, 128.64, 128.35, 127.07, 65.03, 53.71, 43.47, 21.71.

HRMS (ESI) *m/z*: [M + Na]<sup>+</sup> Calcd for C<sub>17</sub>H<sub>18</sub>O<sub>3</sub>SNa 325.0869, found 325.0869.

**3'-methyl-3'-(tosylmethyl)-10,11-dihydrospiro[dibenzo[*a,d*][7]annulene-5,2'-oxirane] (4)**

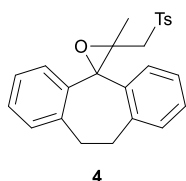

4

White solid, 73.8 mg, 73% yield, mp 167-169 °C.

**<sup>1</sup>H NMR** (400 MHz, CDCl<sub>3</sub>): δ 7.60 (dt, *J* = 8.4, 2.0 Hz, 2H), 7.27 (d, *J* = 8.0 Hz, 2H), 7.24-7.22 (m, 1H), 7.13-7.00 (m, 5H), 6.85 (t, *J* = 7.6 Hz, 1H), 6.69 (d, *J* = 7.6 Hz, 1H), 3.34-3.27 (m, 1H), 3.23-3.15

(m, 2H), 2.94 (d, *J* = 14.4 Hz, 1H), 2.90-2.78 (m, 2H), 2.41 (s, 3H), 1.32 (s, 3H).

**<sup>13</sup>C NMR** (101 MHz, CDCl<sub>3</sub>): δ 144.77, 137.90, 137.86, 137.69, 137.41, 135.94, 129.95, 129.76, 128.89, 128.58, 128.25, 128.17, 126.21, 126.07, 125.89, 125.71, 68.76, 64.07, 59.87, 32.64, 31.77, 21.87, 18.14.

HRMS (ESI) *m/z*: [M + Na]<sup>+</sup> Calcd for C<sub>17</sub>H<sub>18</sub>O<sub>3</sub>SNa 427.1338, found 427.1332.

**(5S)-3'-methyl-3'-(tosylmethyl)-6,7,8,9-tetrahydrospiro[benzo[7]annulene-5,2'-oxirane] (5)**

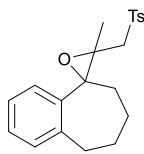

5

White solid, 54.3 mg, 61% yield, mp 95-97 °C.

**<sup>1</sup>H NMR** (400 MHz, CDCl<sub>3</sub>): δ 7.54 (d, *J* = 8.4 Hz, 2H), 7.25 (d, *J* = 8.4 Hz, 2H), 7.05 (t, *J* = 7.2 Hz, 1H), 6.98 (d, *J* = 6.0 Hz, 1H), 6.84 (t, *J* = 7.6 Hz, 1H), 6.43 (d, *J* = 7.6 Hz, 1H), 3.07 (d, *J* = 15.6 Hz, 1H),

2.70-2.54 (m, 3H), 2.40 (s, 3H), 1.93-1.63 (m, 8H), 1.31-1.25 (m, 1H).

**<sup>13</sup>C NMR** (101 MHz, CDCl<sub>3</sub>): δ 144.64, 139.93, 139.27, 137.63, 129.60, 129.22, 128.62, 128.03, 126.26, 125.91, 68.69, 61.54, 60.04, 36.08, 33.36, 27.32, 27.28, 21.85, 18.67.

HRMS (ESI) *m/z*: [M + Na]<sup>+</sup> Calcd for C<sub>17</sub>H<sub>18</sub>O<sub>3</sub>SNa 379.1338, found 379.1333.

## 2-methyl-1,2-diphenyl-3-tosylpropan-1-ol (**6**)

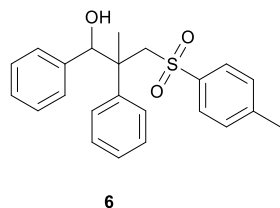

**6**

White solid, 129.4 mg, 68% yield, mp 115-117 °C.

**<sup>1</sup>H NMR** (400 MHz, CDCl<sub>3</sub>): δ 7.54 (dd, *J* = 8.0, 2.0 Hz, 2H), 7.15-7.04 (m, 10H), 6.79 (d, *J* = 7.6 Hz, 2H), 4.99 (s, 1H), 3.74 (d, *J* = 14.4 Hz, 1H), 3.60 (d, *J* = 14.4 Hz, 1H), 2.54 (s, 1H), 2.33 (s, 3H), 1.61 (s, 3H).

**<sup>13</sup>C NMR** (101 MHz, CDCl<sub>3</sub>): δ 144.42, 140.49, 139.54, 138.54, 129.86, 128.25, 127.98, 127.84, 127.63, 127.10, 80.63, 64.33, 47.03, 21.74, 20.71.

HRMS (ESI) *m/z*: [M + Na]<sup>+</sup> Calcd for C<sub>17</sub>H<sub>18</sub>O<sub>3</sub>SNa 403.1338, found 403.1337.

## 4. References

1. X. Mo and D. G. Hall, *J. Am. Chem. Soc.*, 2016, **138**, 10762-10765.
2. P. Xu, K. Hu, Z. Gu, Y. Cheng and C. Zhu, *Chem. Commun.*, 2015, **51**, 7222-7225.
3. L. Zheng, H. Huang, C. Yang and W. Xia, *Org. Lett.*, 2015, **17**, 1034-1037.
4. Z. Deng, J. Wei, L. Liao, H. Huang and X. Zhao, *Org. Lett.*, 2015, **17**, 1834-1837.
5. G. Barker, D. G. Johnson, P. C. Young, S. A. Macgregor and A.-L. Lee, *Chem. Eur. J.*, 2015, **21**, 13748-13757.
6. K. Zhang, T. Liang, Y. Wang, C. He, M. Hu, X.-H. Duan and L. Liu, *Org. Chem. Front.*, 2022, **9**, 966-972.
7. J. Yang, G. Li, K. Yu, B. Xu, and Q. Chen, *J. Org. Chem.* 2022, **87**, 1208-1217.
8. H. -D. Zuo, W.-J. Hao, C. -F. Zhu, C. Guo, S. -J. Tu, and B. Jiang, *Org. Lett.*, 2020, **22**, 4471-4477.
9. J. R. Thondur, D. S. Sharada, and G. Satyanarayana, *Org. Lett.*, 2023, **25**, 2793-2797.
10. Y. Yuan, Y. Cao, Y. Lin, Y. Li, Z. Huang, and A. Lei, *ACS Catal.*, 2018, **8**, 10871-10875.
11. R. A. Sheldon, *Green Chem.*, 2007, **9**, 1273-1283.
12. K. V. Aken, L. Streckowski, and L. Patiny, *Beilstein J. Org. Chem.*, **2**, 3-9.
13. B. M. Trost, *Angew. Chem. Int. Ed.*, 1995, **34**, 259-281.
14. X. -Q. Chu, H. Meng, X. -P. Xu, and S. -J. Ji, *Chem. Eur. J.*, 2015, **21**, 11359-11368.
15. X. Zhang, Z. Zhang, J. -N. Song, and Z. Wang, *Chem. Sci.*, 2020, **11**, 7921-7926.



## 5. $^1\text{H}$ NMR and $^{13}\text{C}$ NMR of products

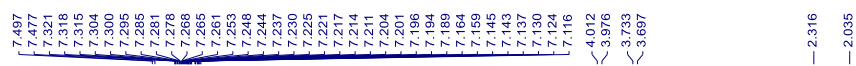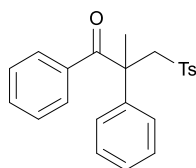

**3aa**  $^1\text{H}$  NMR (400 MHz,  $\text{CDCl}_3$ )

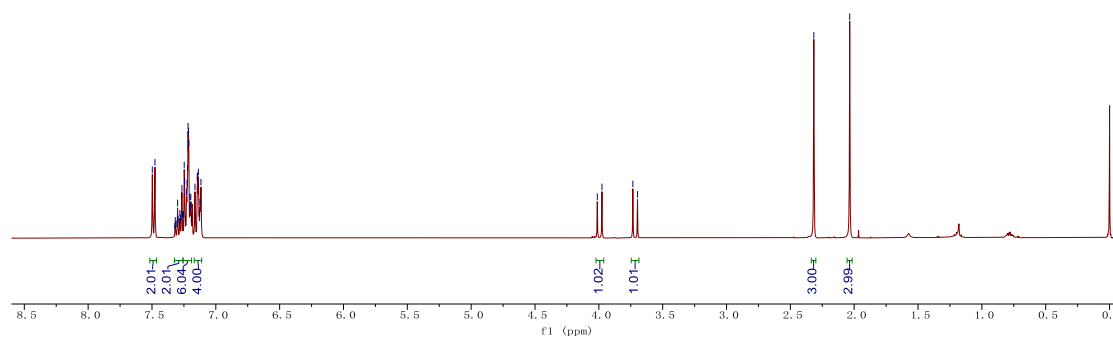

201.310

144.142  
139.520  
138.809  
136.346  
131.948  
129.743  
129.374  
129.357  
128.221  
128.081  
127.683  
126.768

77.519  $\text{CDCl}_3$   
77.201  $\text{CDCl}_3$   
76.883  $\text{CDCl}_3$

65.705

53.805

22.257  
21.707

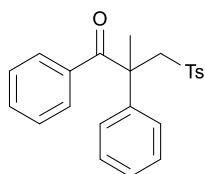

**3aa**  $^{13}\text{C}$  NMR (101 MHz,  $\text{CDCl}_3$ )

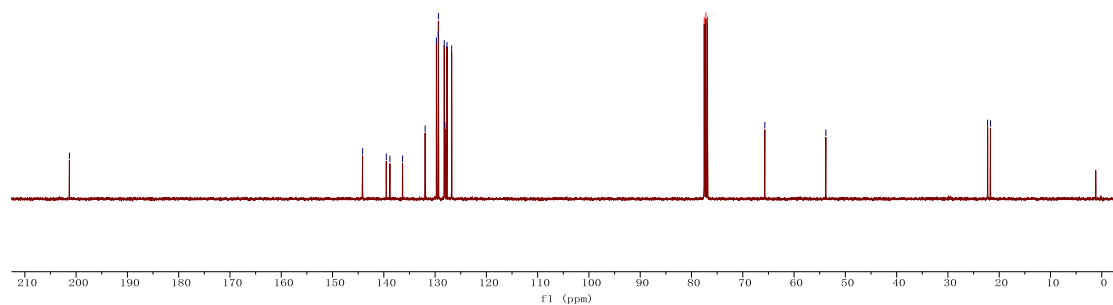

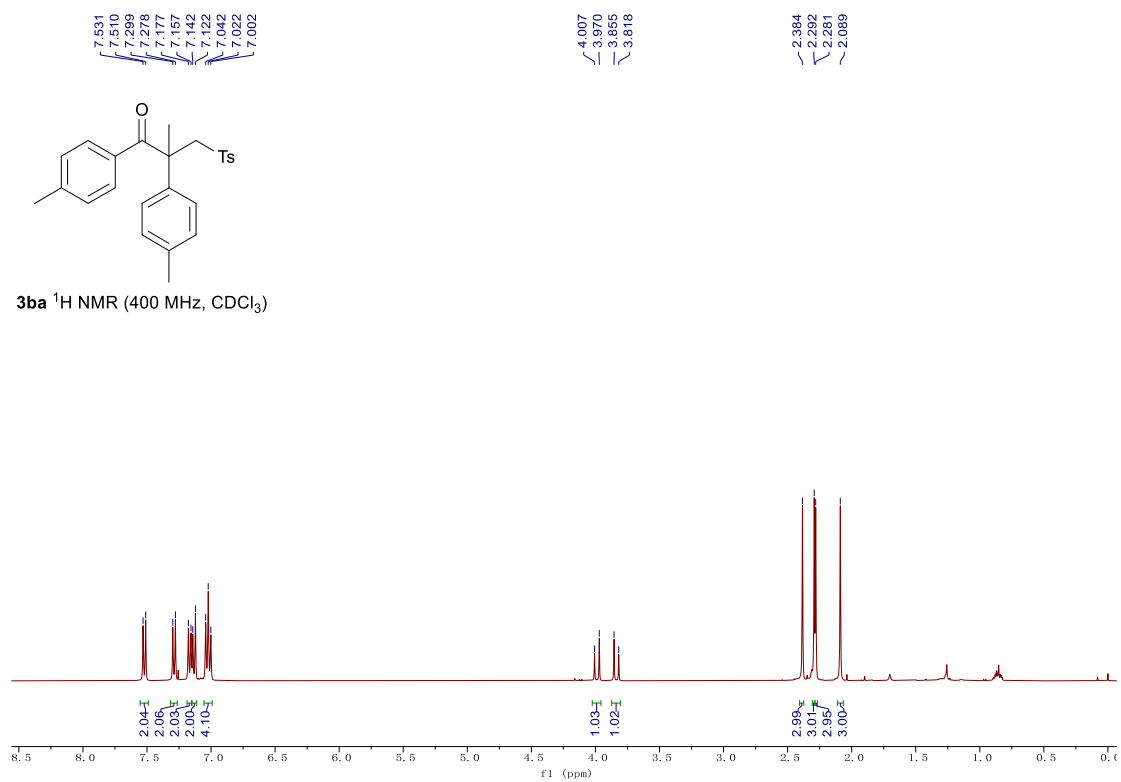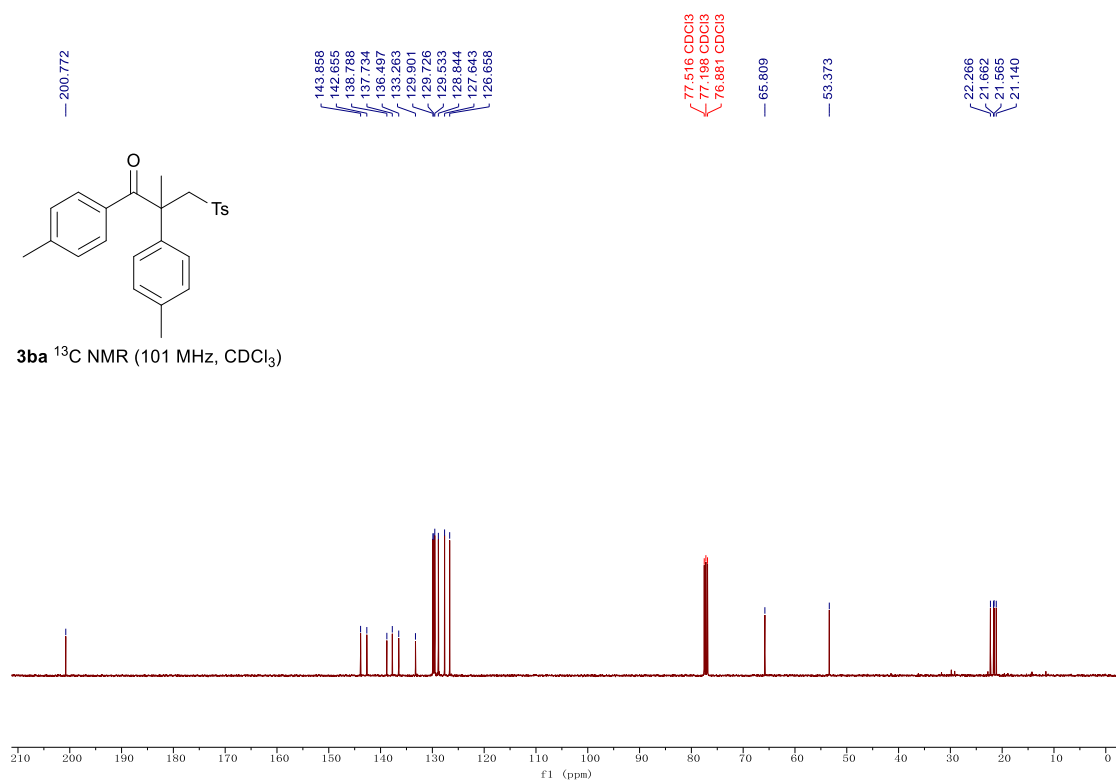

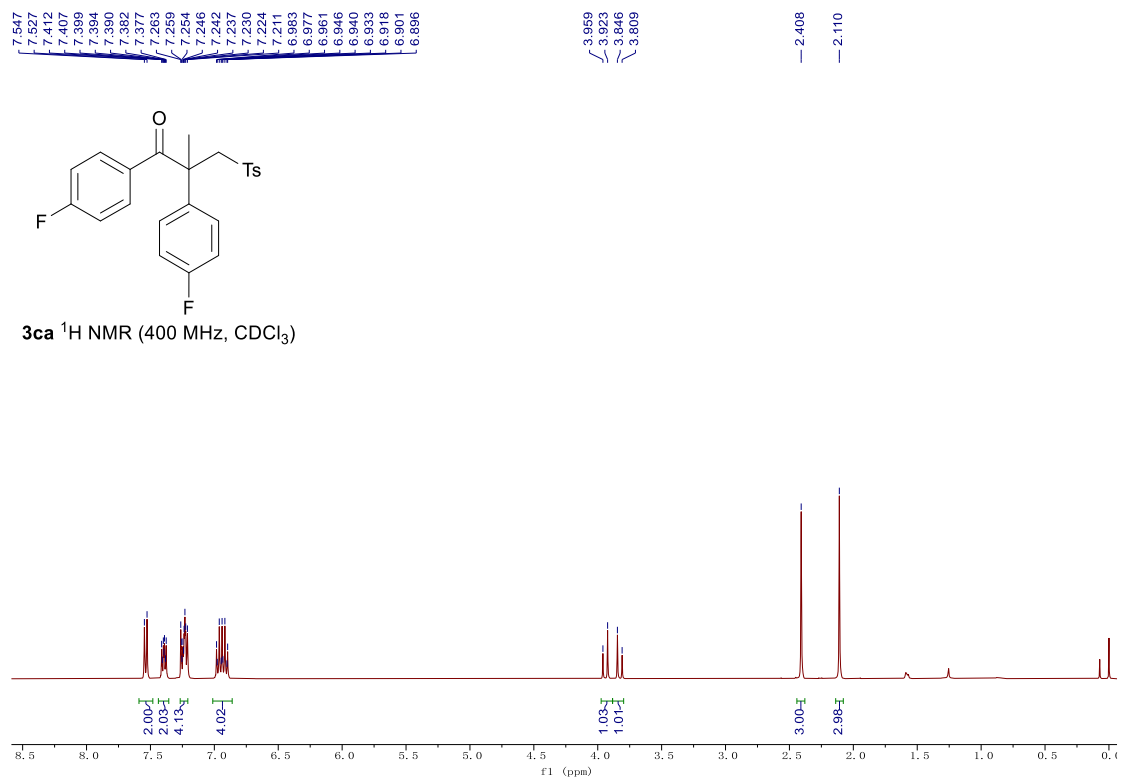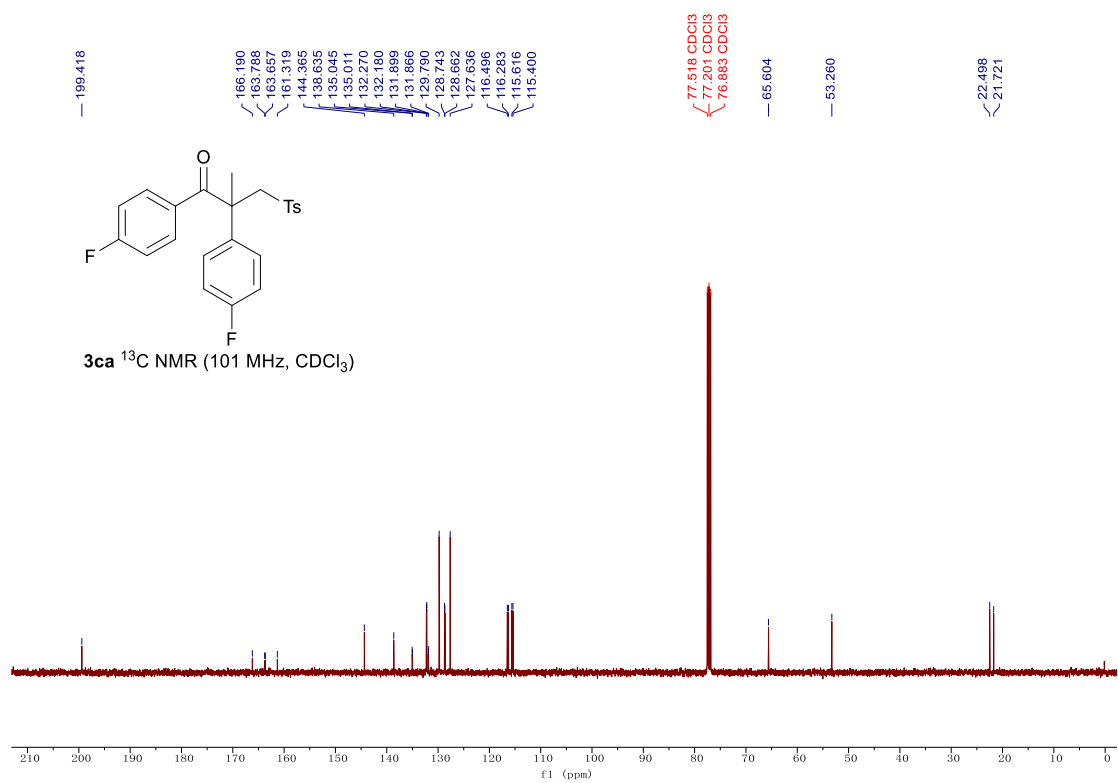

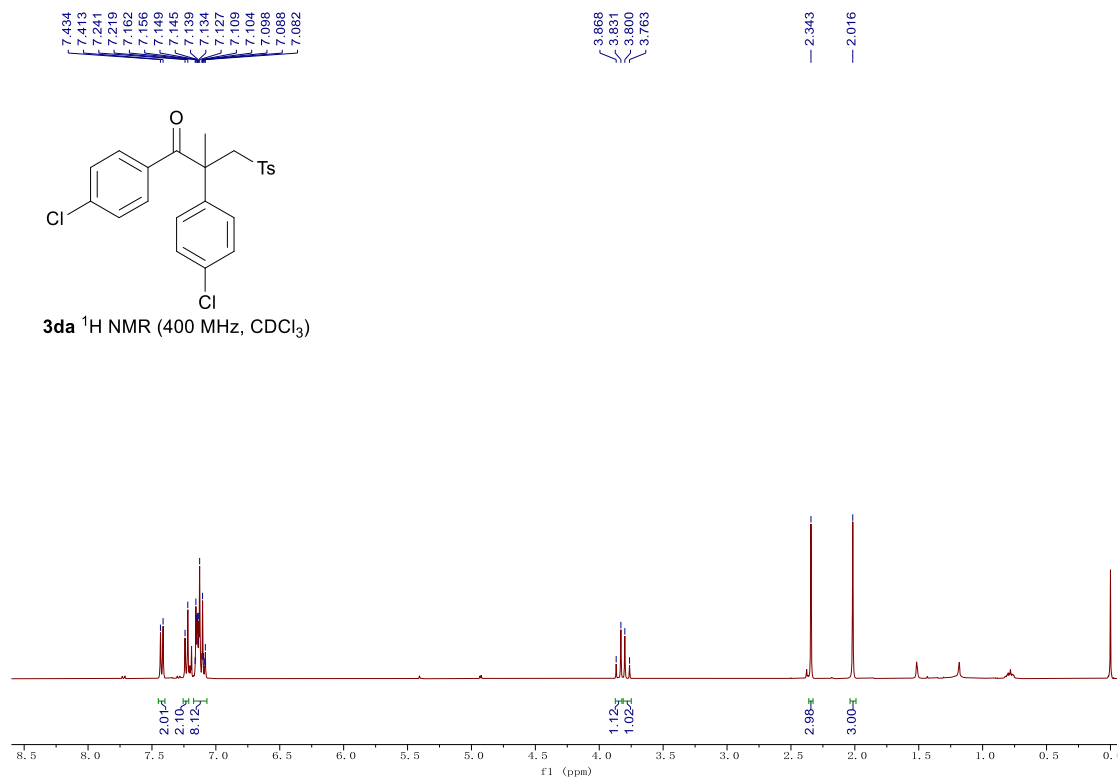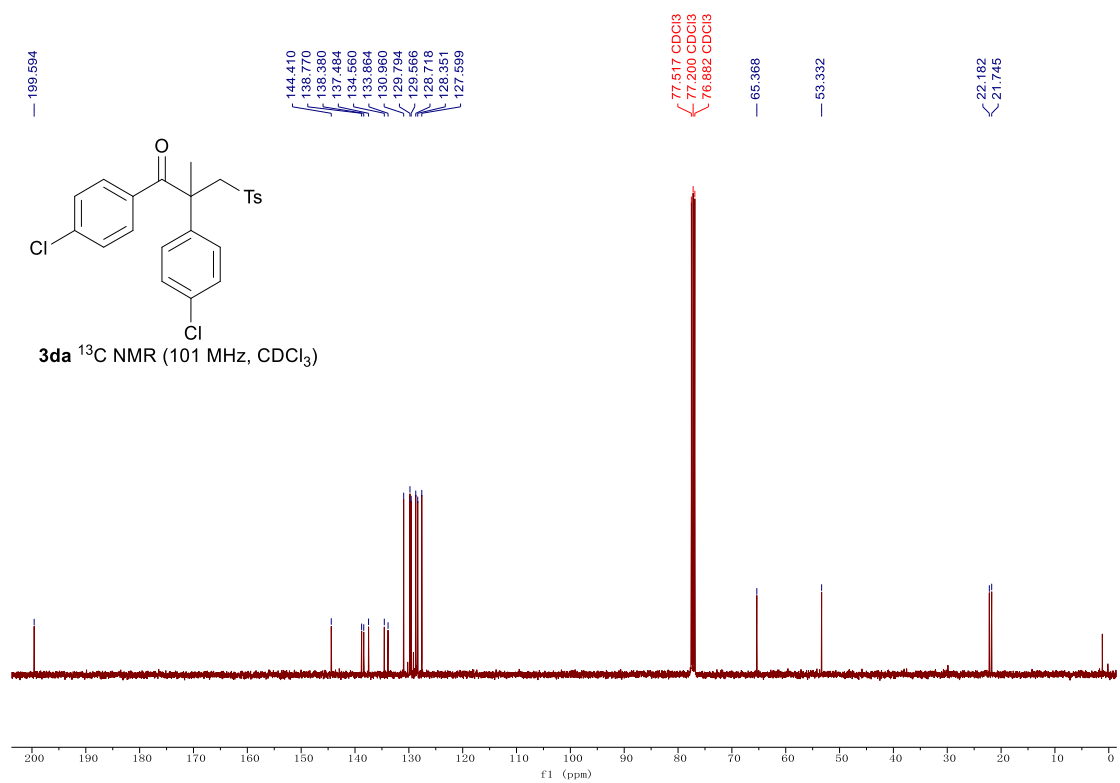

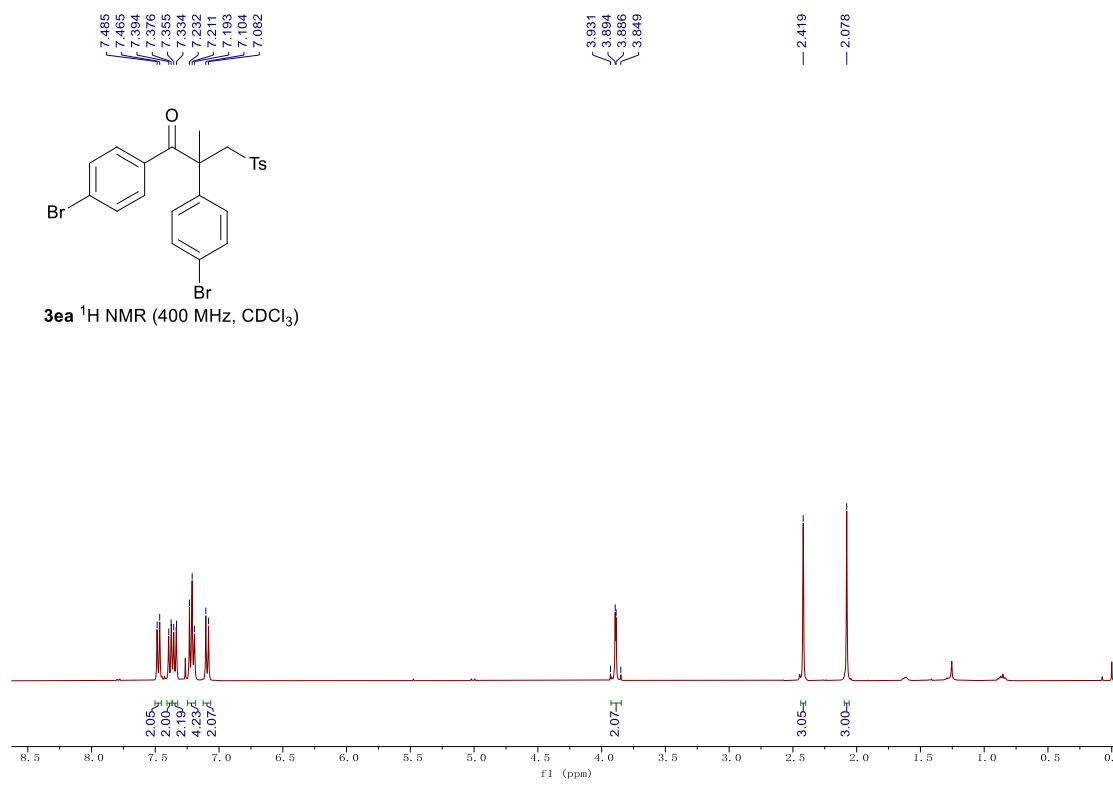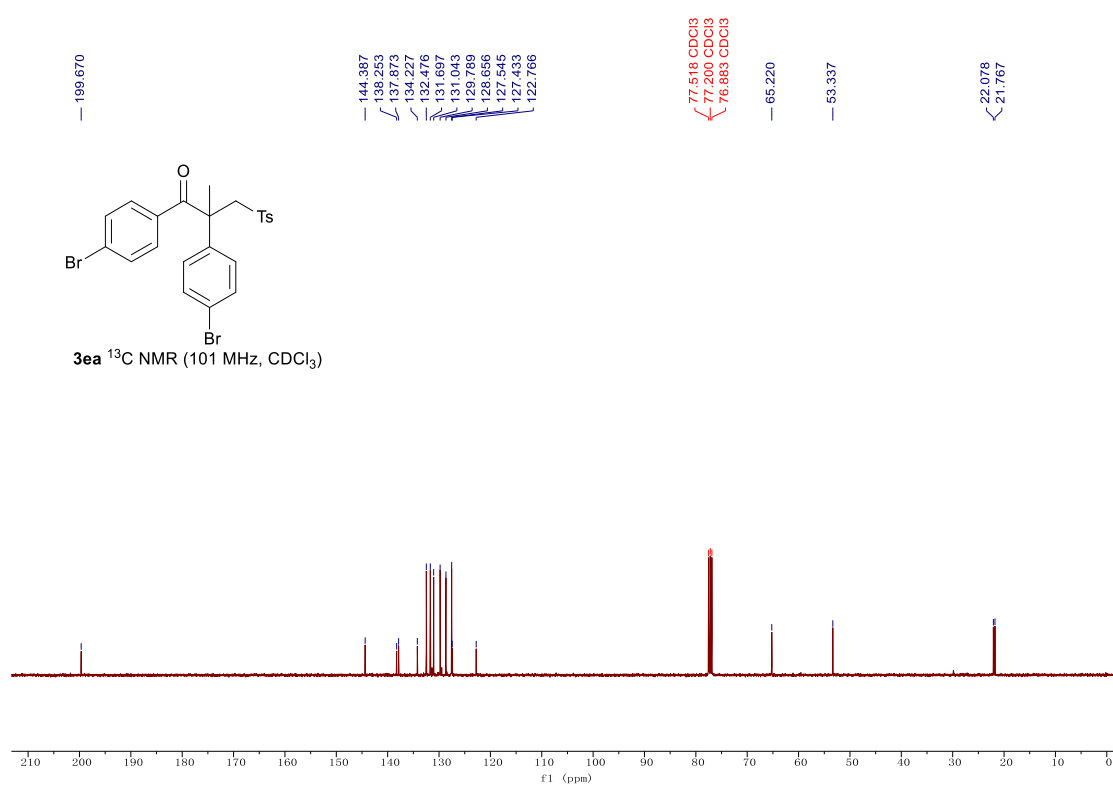

7.570  
7.551  
7.511  
7.463  
7.444  
7.439  
7.433  
7.429  
7.422  
7.417  
7.412  
7.402  
7.397  
7.396  
7.356  
7.326  
7.314  
7.309  
7.305  
7.295  
7.276  
7.257  
7.112  
7.092

3.968  
3.931  
3.835  
3.798

2.291  
2.065

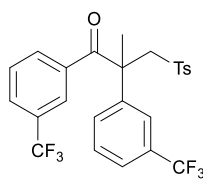

3fa  $^1\text{H}$  NMR (400 MHz,  $\text{CDCl}_3$ )

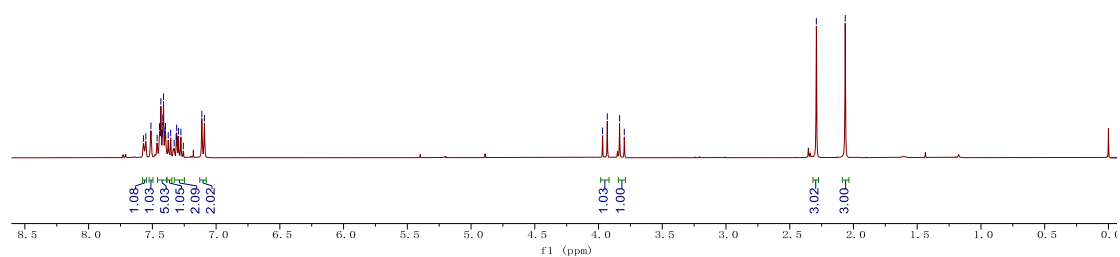

199.360  
144.637  
139.861  
136.122  
136.318  
132.399  
132.186  
132.076  
131.751  
131.585  
131.427  
131.259  
130.831  
130.824  
130.494  
130.108  
129.882  
129.038  
128.816  
128.781  
128.746  
128.711  
127.566  
126.274  
126.234  
126.195  
126.156  
125.351  
125.314  
125.277  
125.241  
125.068  
124.847  
123.676  
123.639  
123.602  
123.563  
122.358  
122.138  
119.646  
119.429

77.507  $\text{CDCl}_3$   
77.189  $\text{CDCl}_3$   
76.871  $\text{CDCl}_3$

65.012

53.665

22.037  
21.587

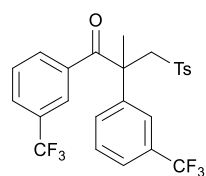

3fa  $^{13}\text{C}$  NMR (101 MHz,  $\text{CDCl}_3$ )

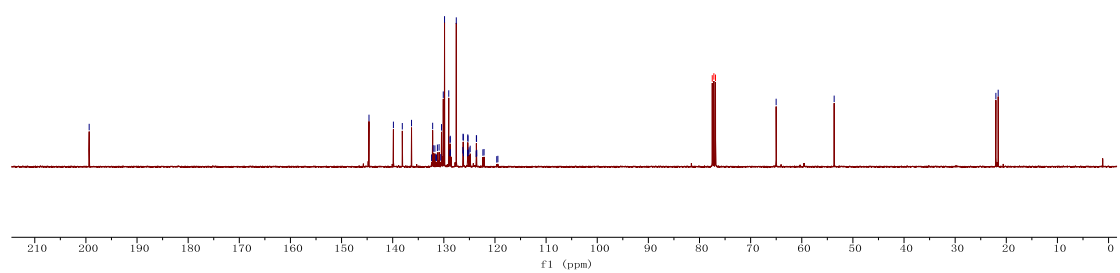

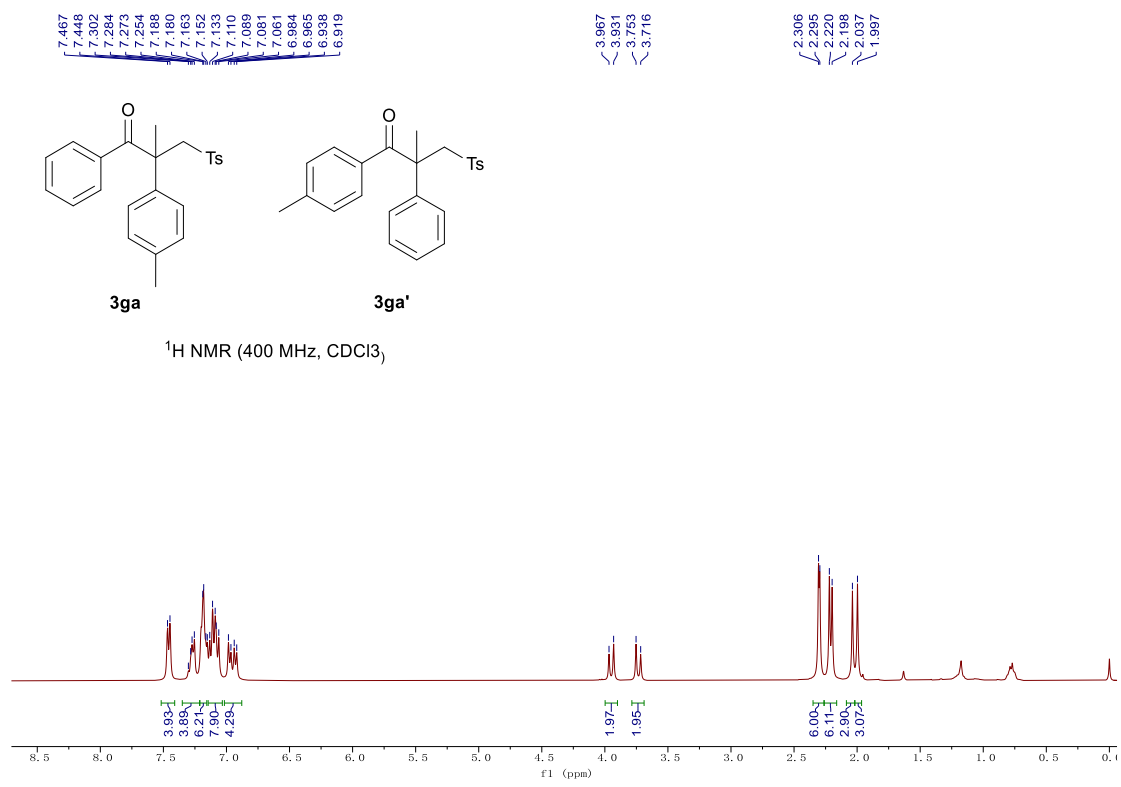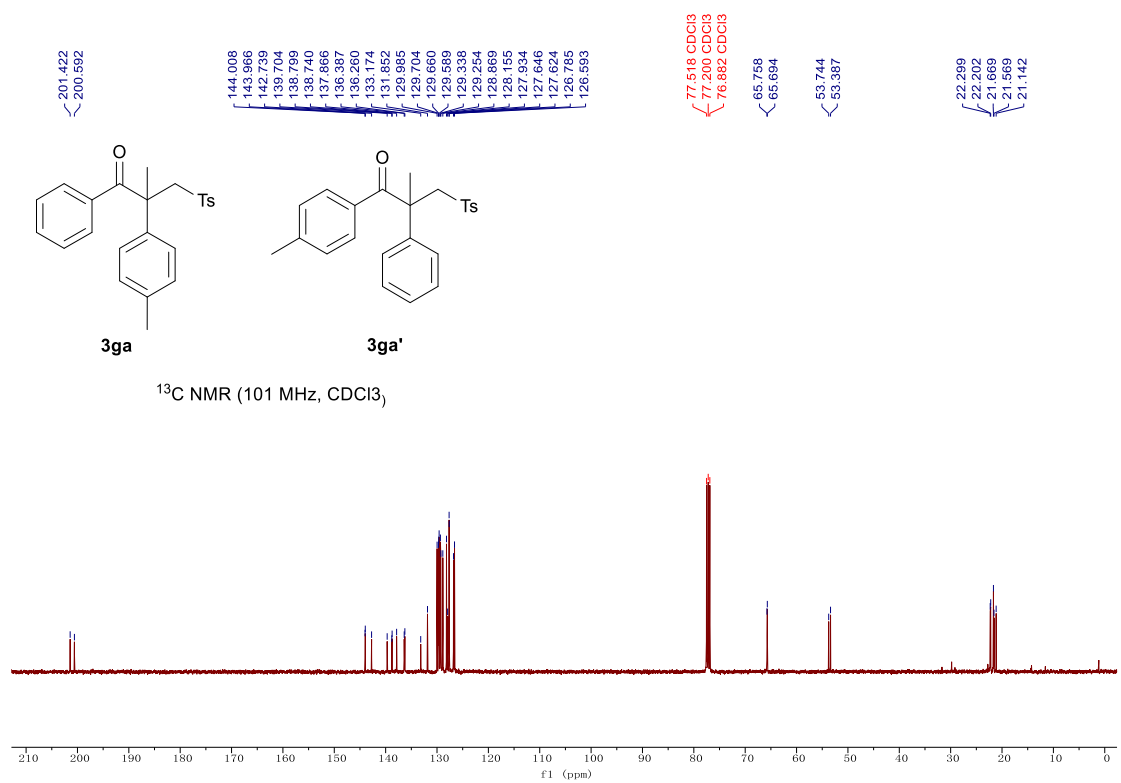

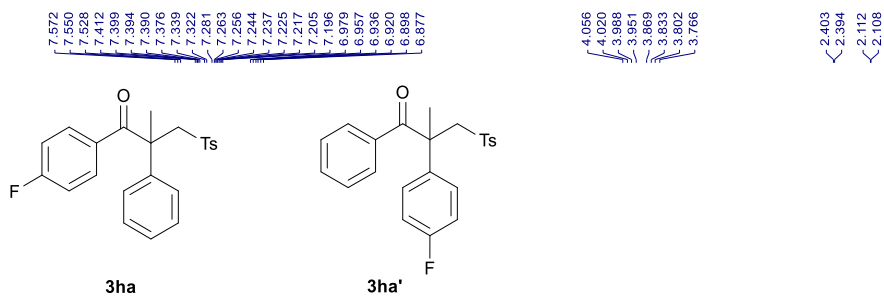

<sup>1</sup>H NMR (400 MHz, CDCl<sub>3</sub>)

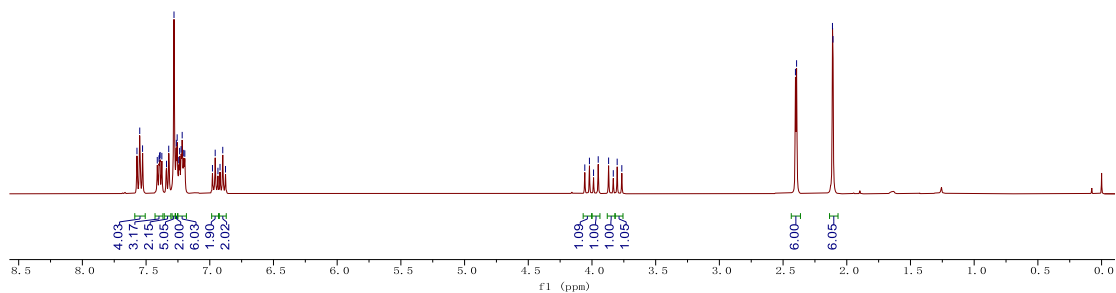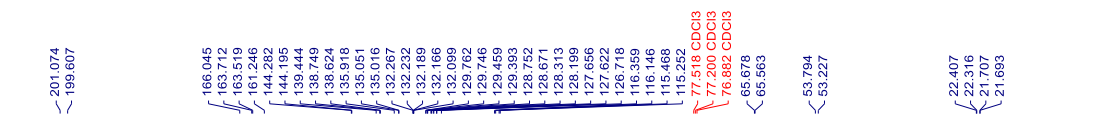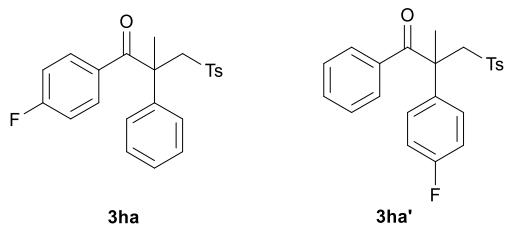

<sup>13</sup>C NMR (101 MHz, CDCl<sub>3</sub>)

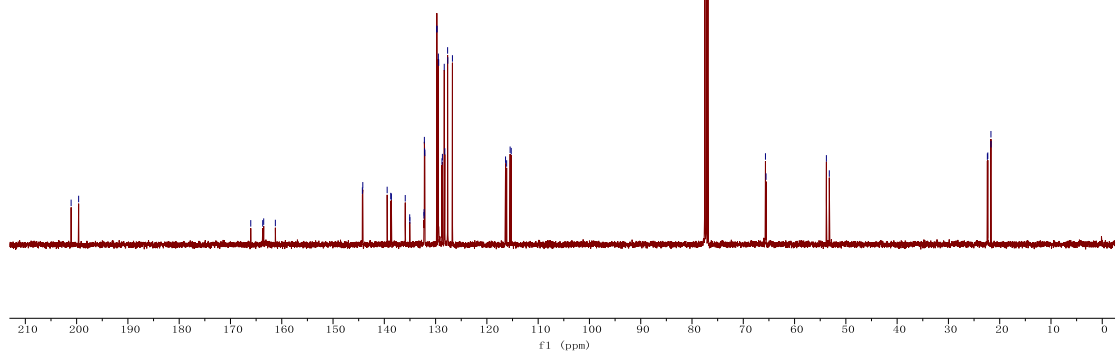



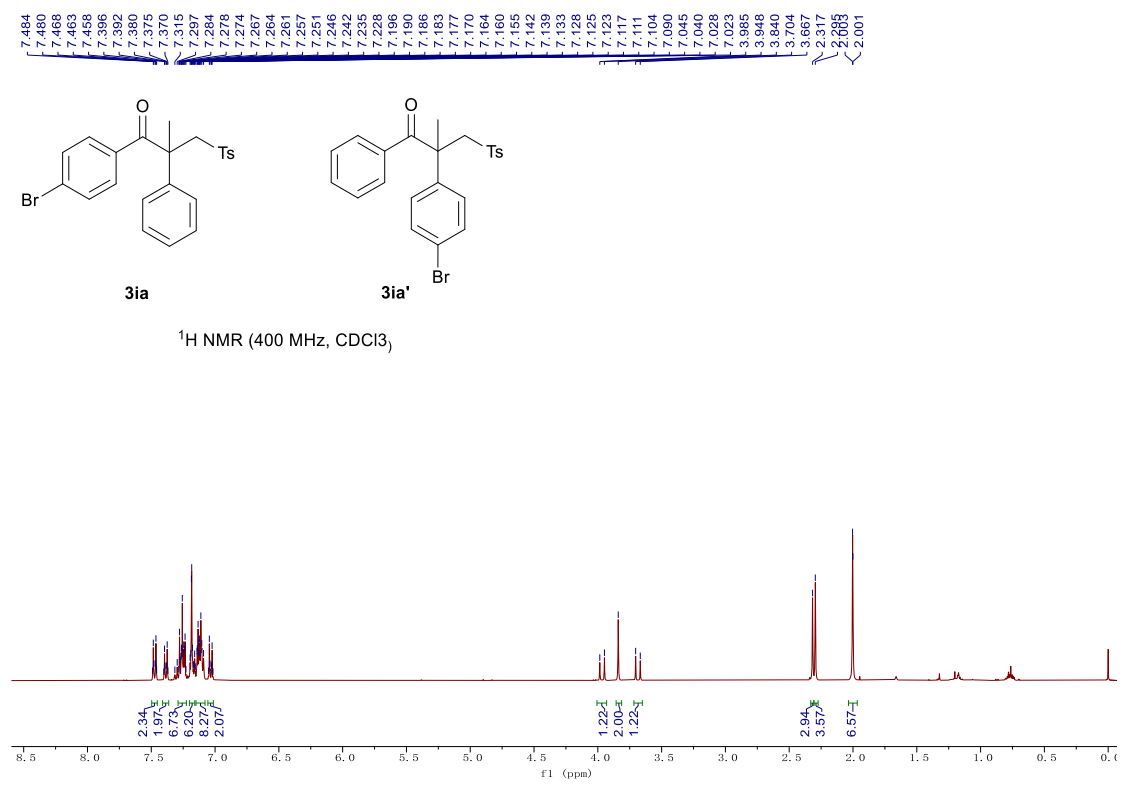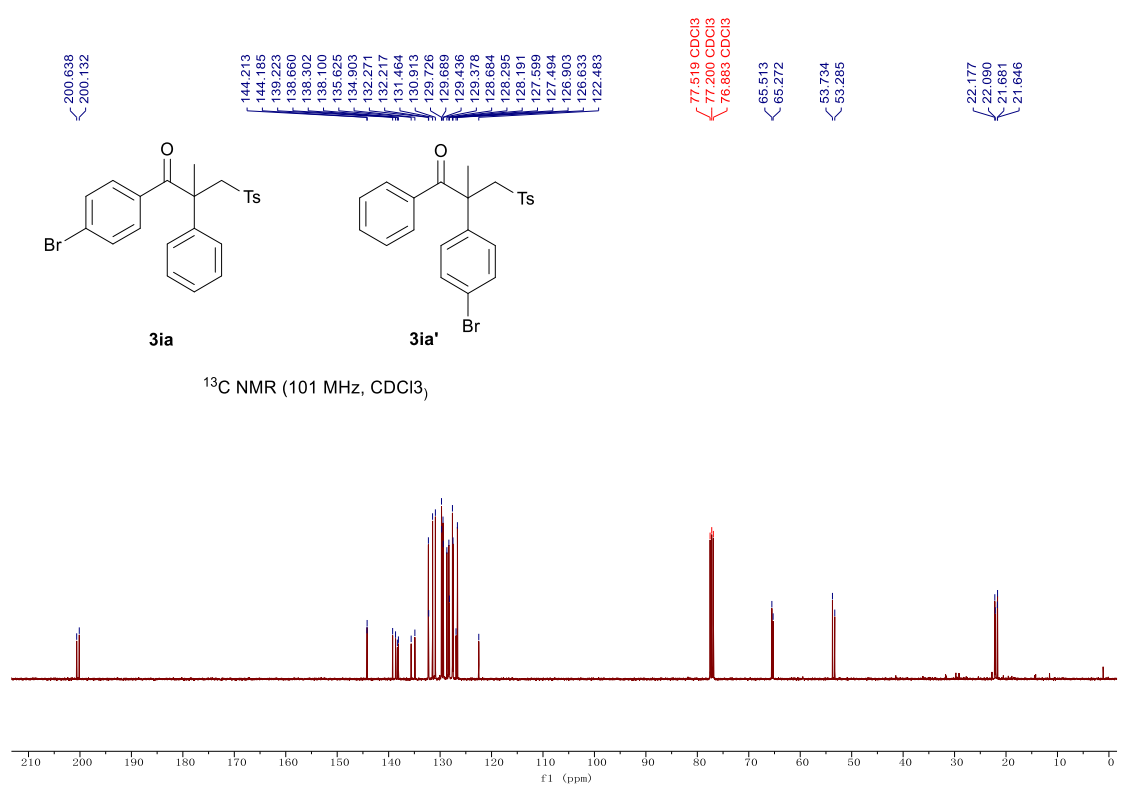

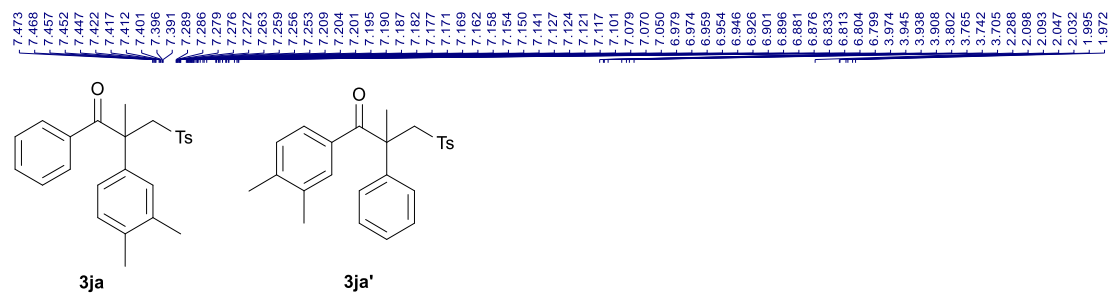

<sup>1</sup>H NMR (400 MHz, CDCl<sub>3</sub>)

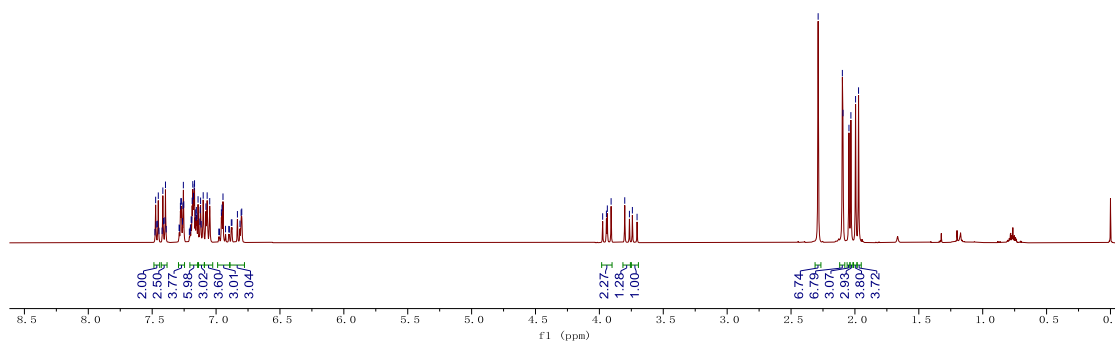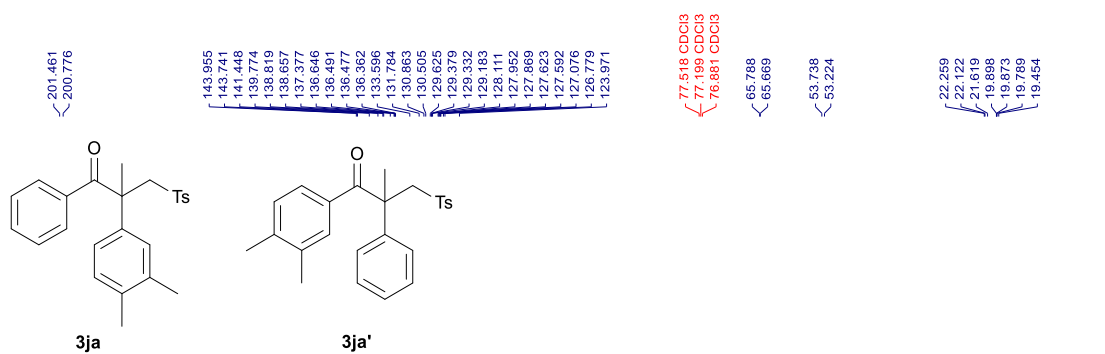

<sup>13</sup>C NMR (101 MHz, CDCl<sub>3</sub>)

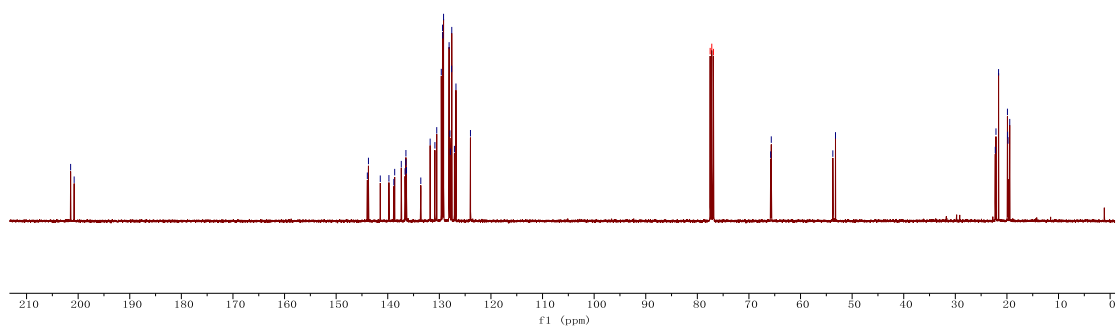

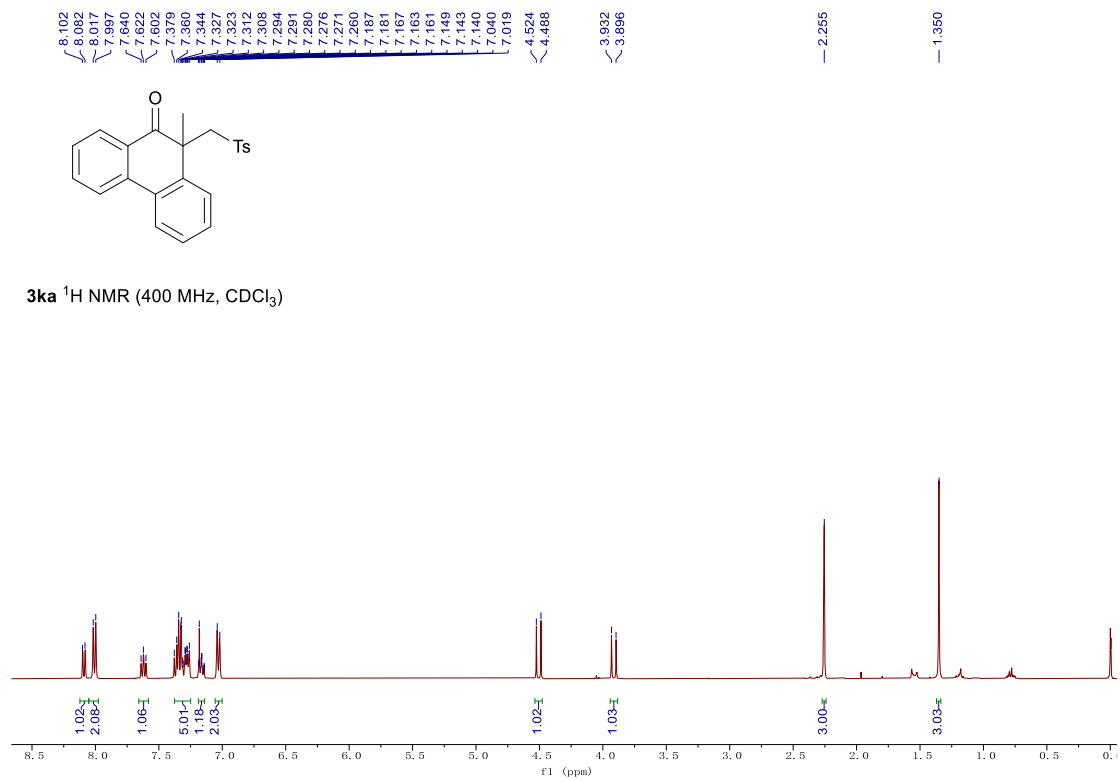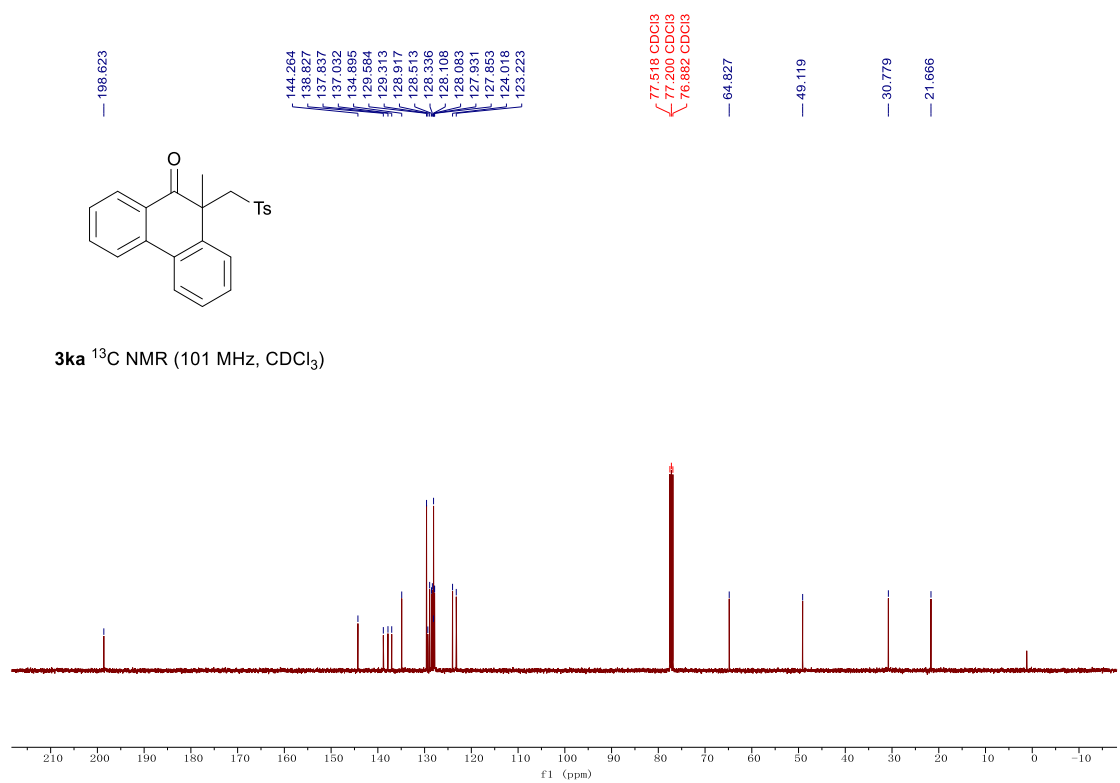

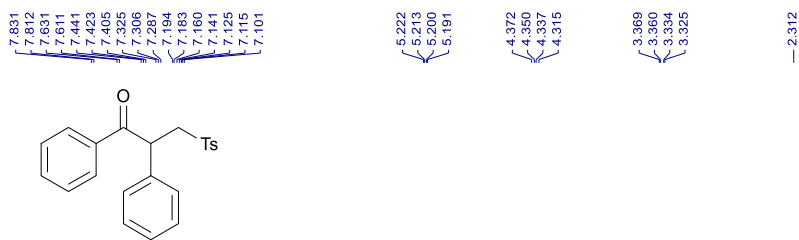

**3la**  $^1\text{H}$  NMR (400 MHz,  $\text{CDCl}_3$ )

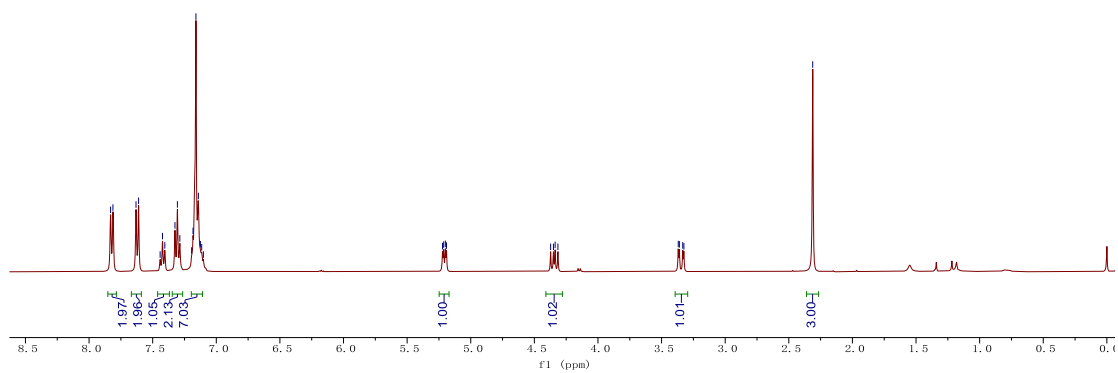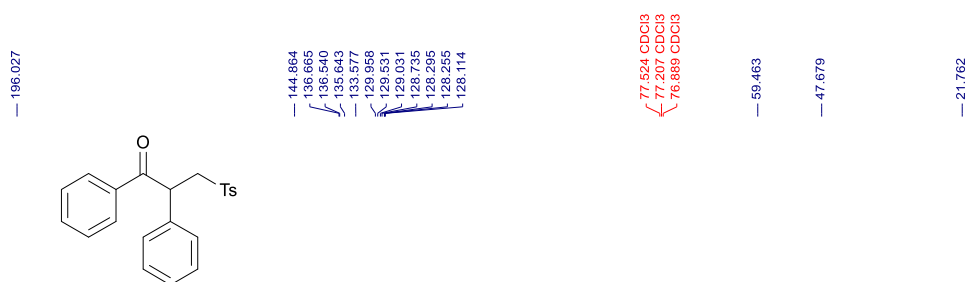

**3la**  $^{13}\text{C}$  NMR (101 MHz,  $\text{CDCl}_3$ )

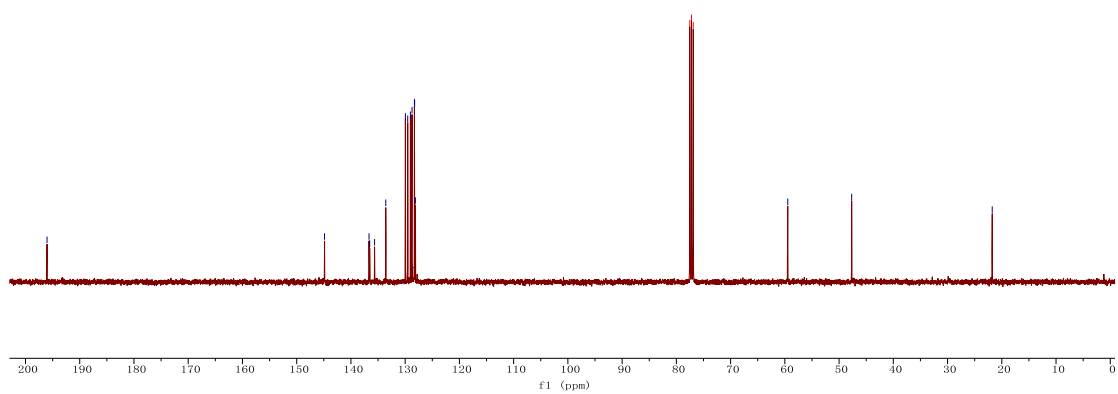

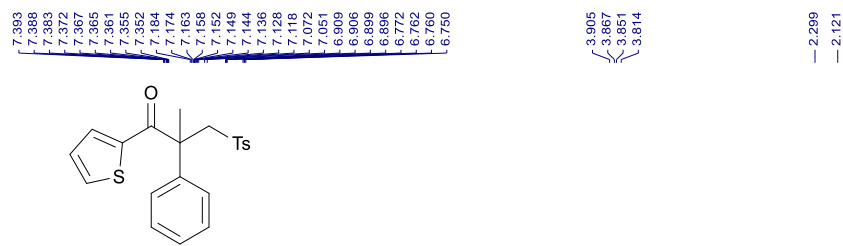

**3ma**  $^1\text{H}$  NMR (400 MHz,  $\text{CDCl}_3$ )

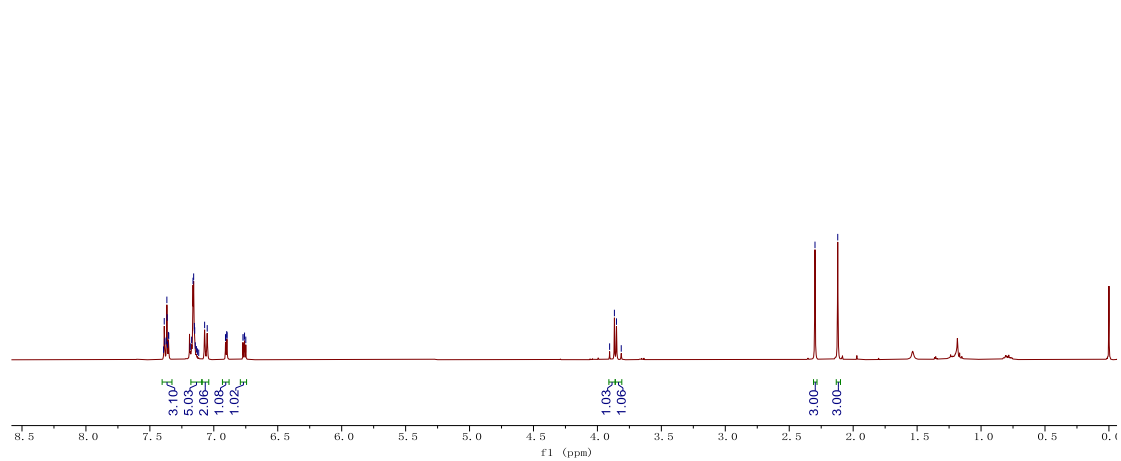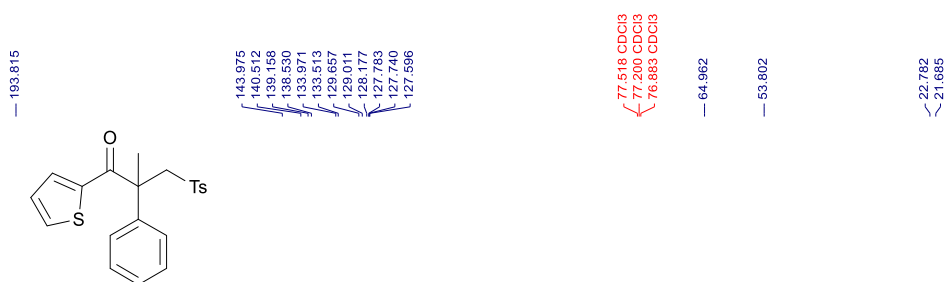

**3ma**  $^{13}\text{C}$  NMR (101 MHz,  $\text{CDCl}_3$ )

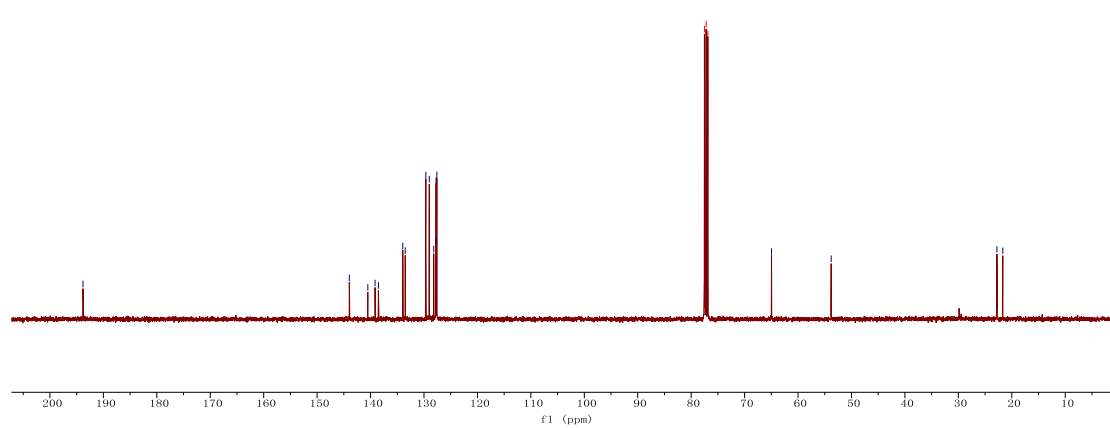

7.619  
7.599  
7.345  
7.342  
7.329  
7.324  
7.234  
7.216  
7.213  
7.207  
7.204  
7.185  
7.179  
6.879  
6.870  
6.858  
6.839  
6.836  
6.830  
6.827

4.205  
4.169

3.647  
3.612

2.347  
2.085

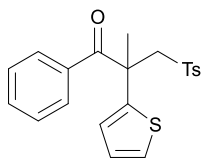

**3ma**  $^1\text{H}$  NMR (400 MHz,  $\text{CDCl}_3$ )

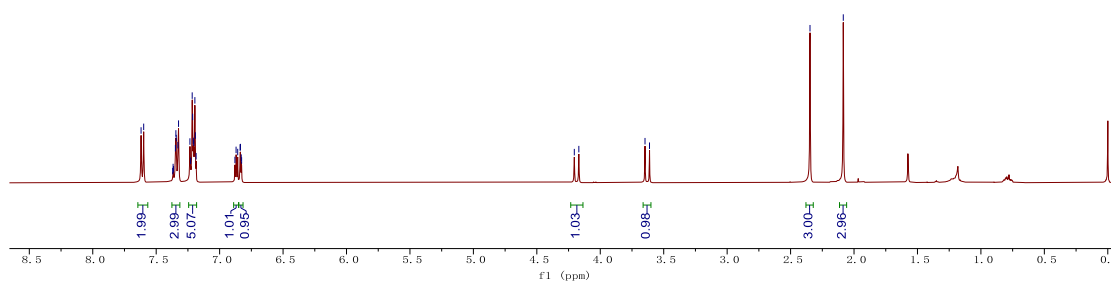

200.732

144.469  
136.698  
136.827  
131.779  
129.890  
128.776  
128.267  
127.811  
126.272  
126.065

77.514  $\text{CDCl}_3$   
77.196  $\text{CDCl}_3$   
76.879  $\text{CDCl}_3$

66.076

51.744

24.921  
21.758

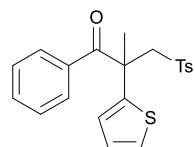

**3ma**  $^{13}\text{C}$  NMR (101 MHz,  $\text{CDCl}_3$ )

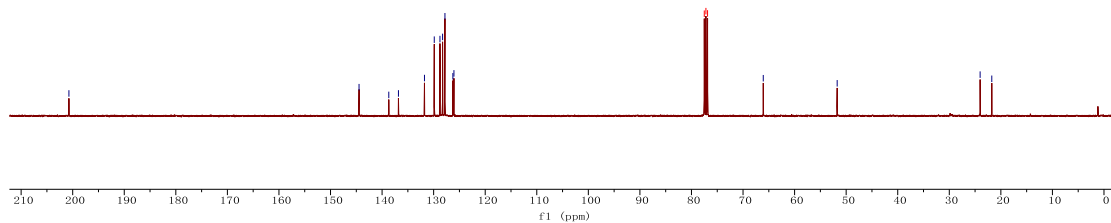

7.555  
7.549  
7.545  
7.533  
7.529  
7.523  
7.250  
7.246  
7.239  
7.233  
7.225  
7.220  
7.216  
7.213  
7.209  
7.193  
7.174  
7.158  
7.152  
7.147  
7.145  
7.141  
7.138  
7.133  
7.128

3.943  
3.906  
3.681  
3.645

2.381  
2.027  
1.960

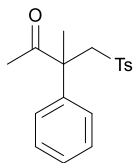

3na  $^1\text{H}$  NMR (400 MHz,  $\text{CDCl}_3$ )

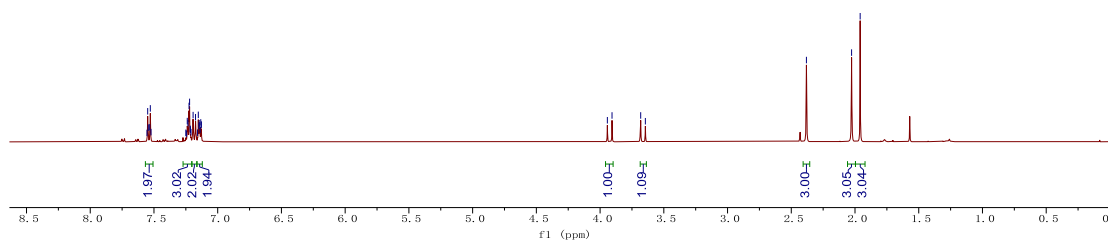

207.437

144.145  
136.586  
136.438  
129.702  
129.029  
127.851  
127.606  
126.562

77.518  $\text{CDCl}_3$   
77.200  $\text{CDCl}_3$   
76.862  $\text{CDCl}_3$

63.877

54.256

25.106  
21.631  
20.061

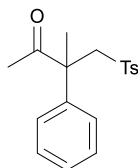

3na  $^{13}\text{C}$  NMR (101 MHz,  $\text{CDCl}_3$ )

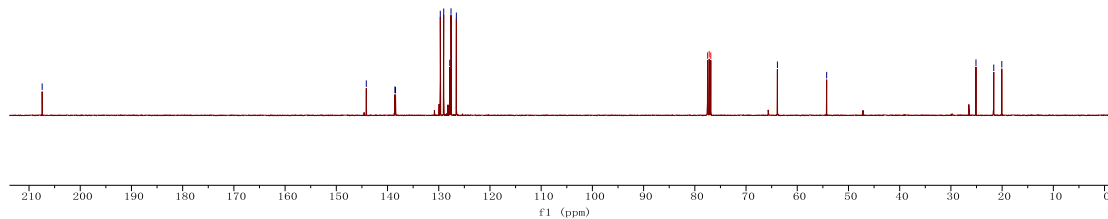

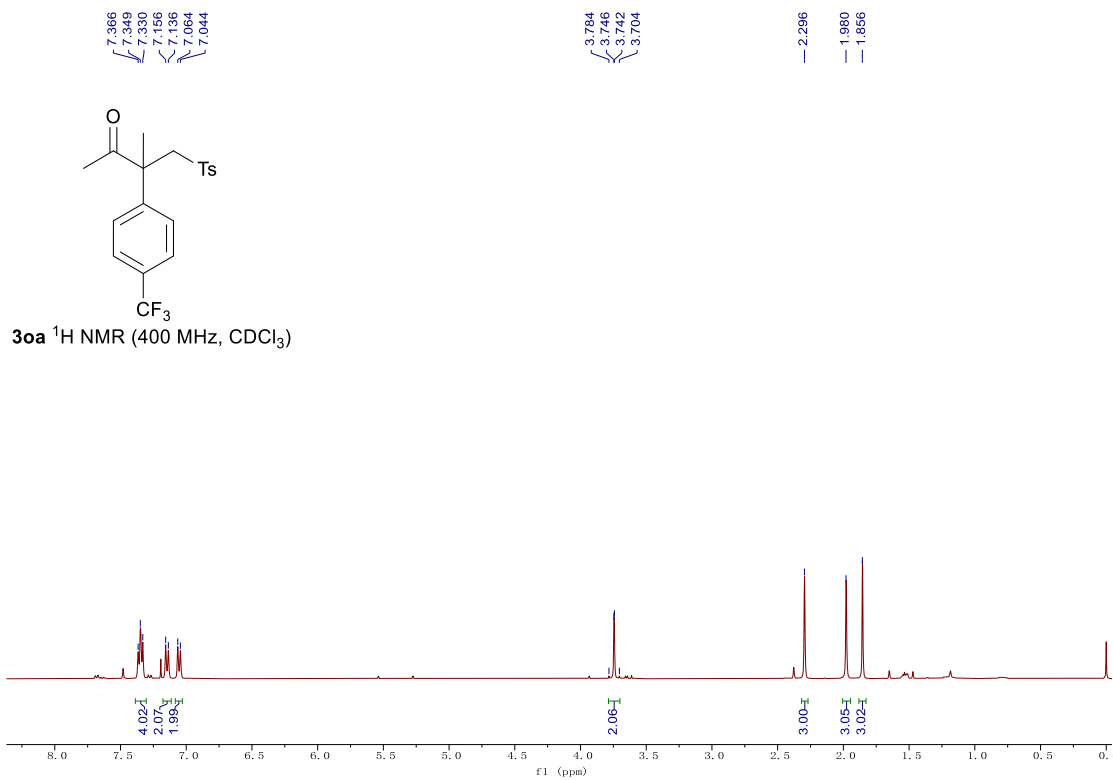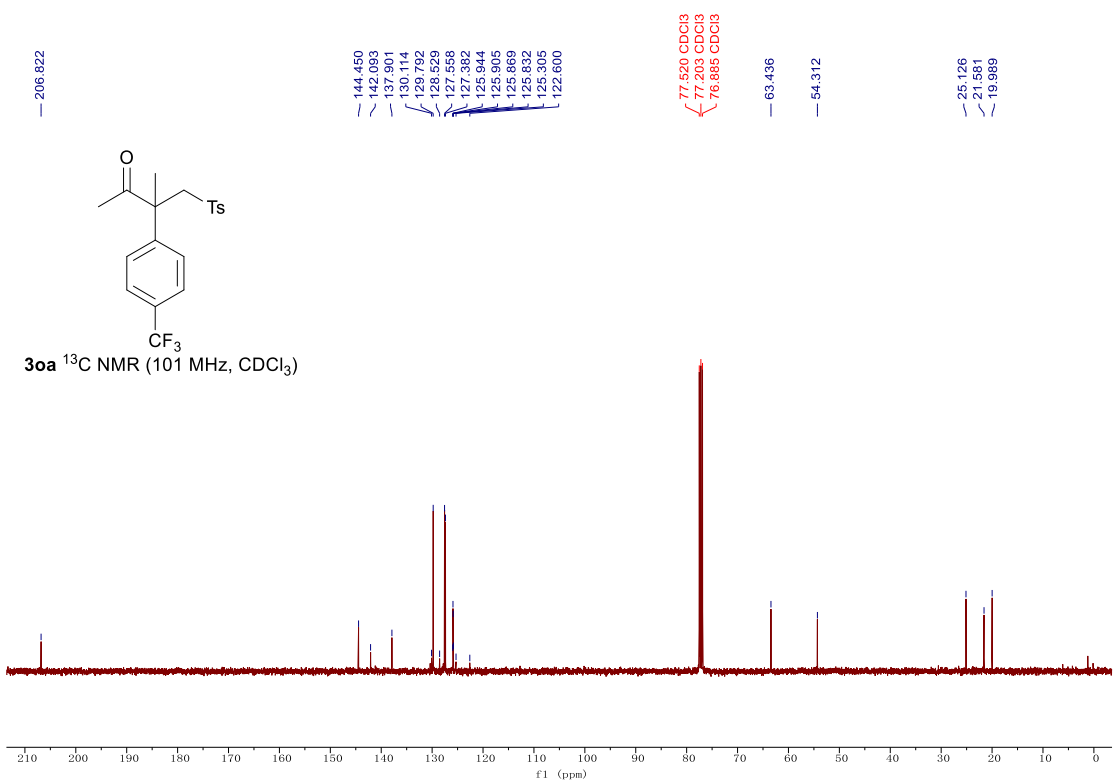



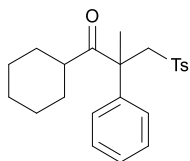

**3pa**  $^1\text{H}$  NMR (400 MHz,  $\text{CDCl}_3$ )

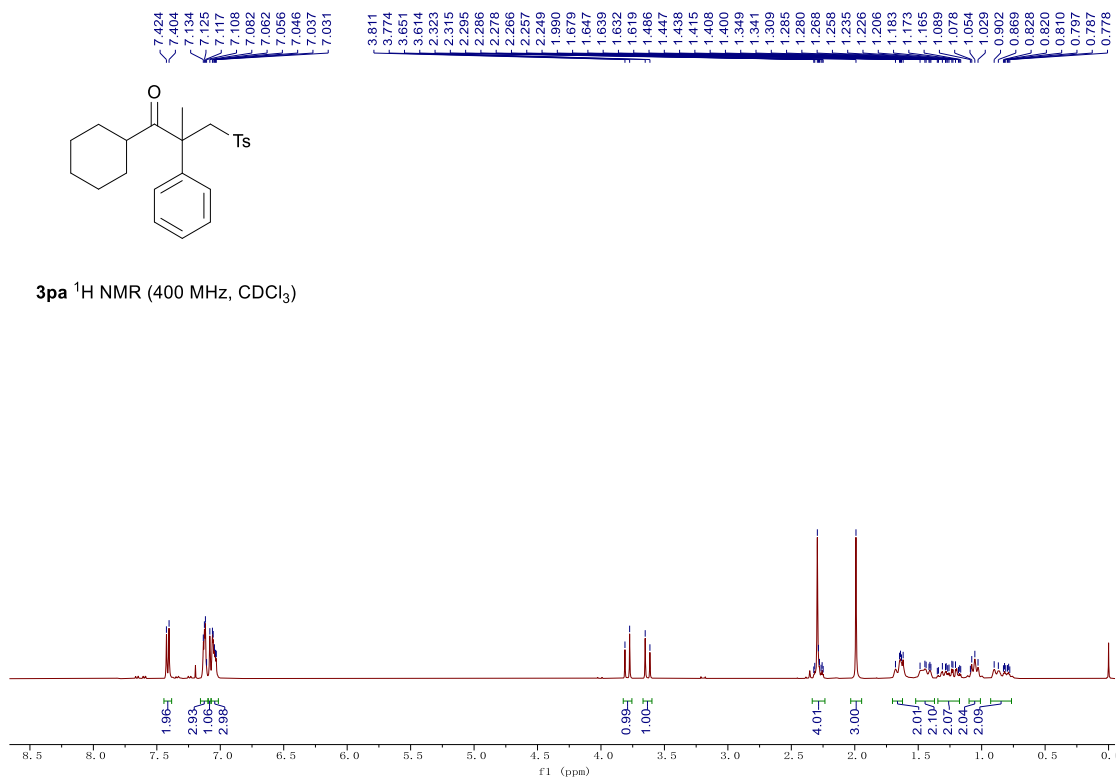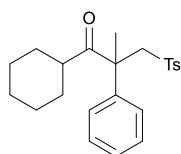

**3pa**  $^{13}\text{C}$  NMR (101 MHz,  $\text{CDCl}_3$ )

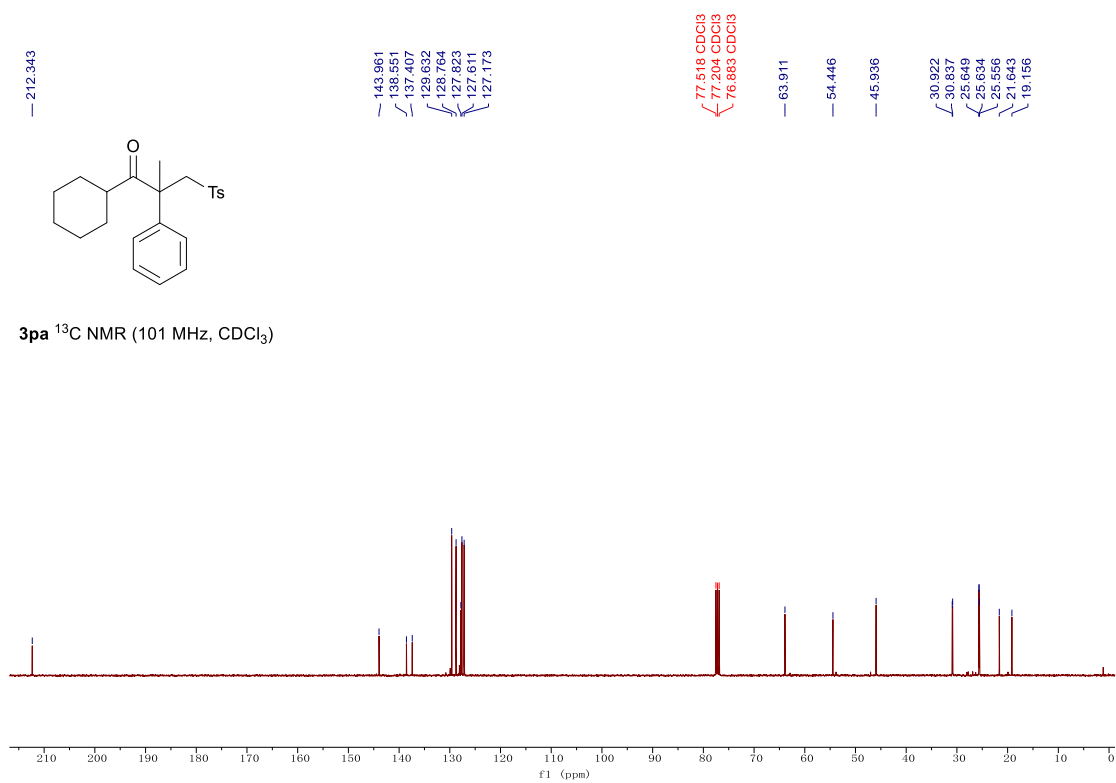

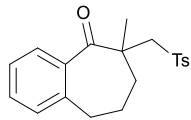

**3qa**  $^1\text{H}$  NMR (400 MHz,  $\text{CDCl}_3$ )

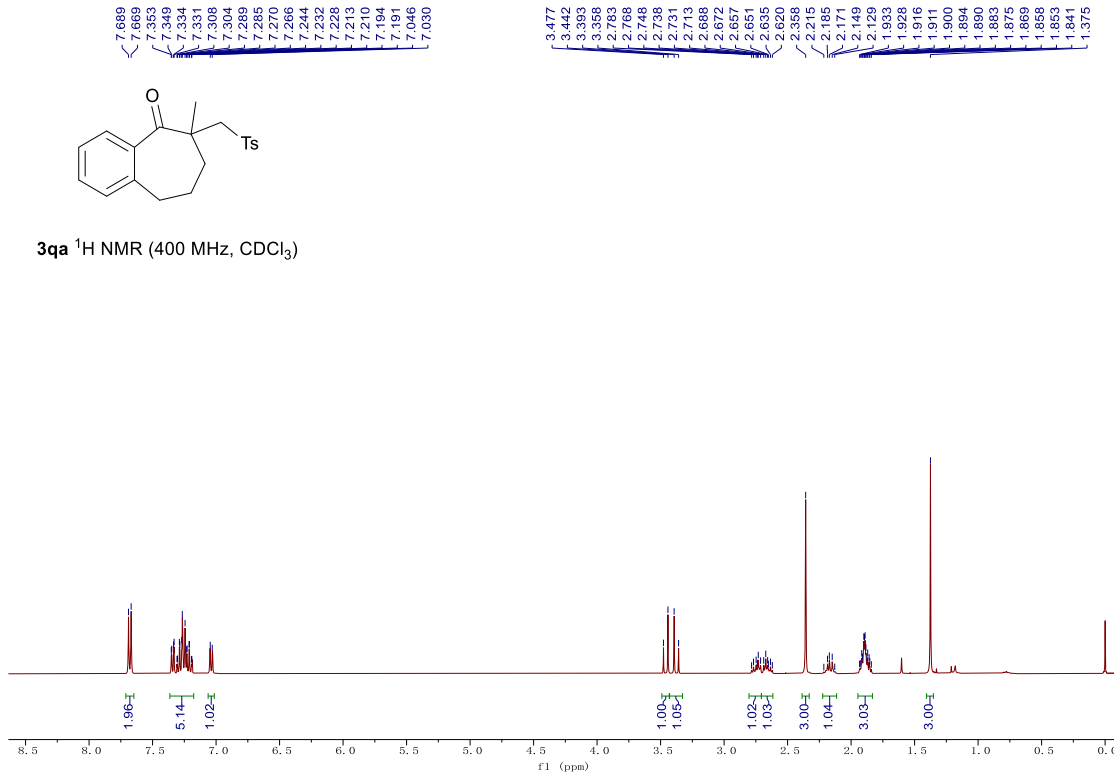

210.966

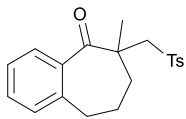

**3qa**  $^{13}\text{C}$  NMR (101 MHz,  $\text{CDCl}_3$ )

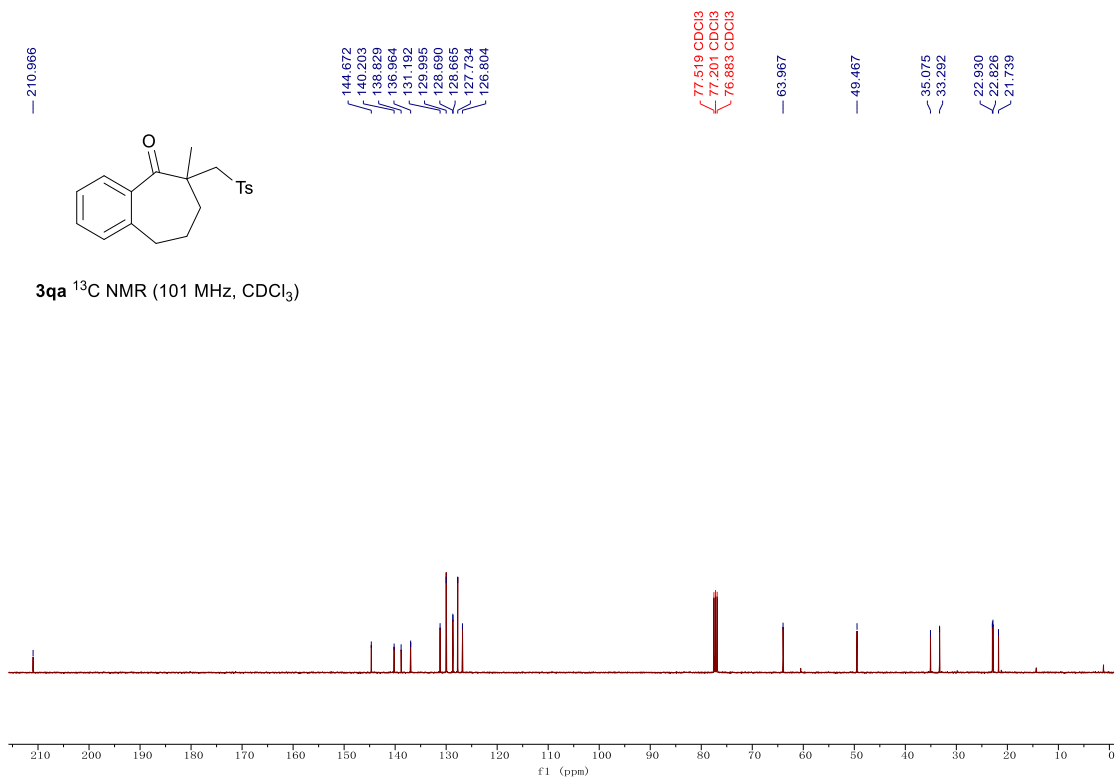

7.701  
7.696  
7.685  
7.680  
7.642  
7.639  
7.635  
7.627  
7.622  
7.618  
7.392  
7.386  
7.370  
7.365  
7.347  
7.345  
7.341  
7.331  
7.326  
7.322  
7.309  
7.265  
7.244  
7.146  
7.140  
7.132  
7.127  
7.121  
7.117  
7.069  
7.060  
7.050  
7.045  
7.039  
3.884  
3.850  
3.794  
3.757  
3.680  
3.643  
3.466  
3.431  
3.431  
2.357  
2.282  
1.998  
1.540  
1.532  
1.520  
1.509  
1.501  
1.221  
1.154  
0.899  
0.888  
0.877  
0.778  
0.758  
0.748  
0.567  
0.557  
0.548  
0.544  
0.538  
0.534  
0.495  
0.490  
0.487  
0.480  
0.476  
0.466  
0.462

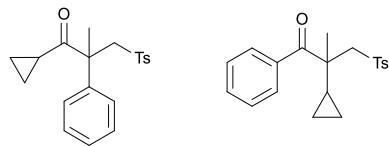

3ra

3ra'

<sup>1</sup>H NMR (400 MHz, CDCl<sub>3</sub>)

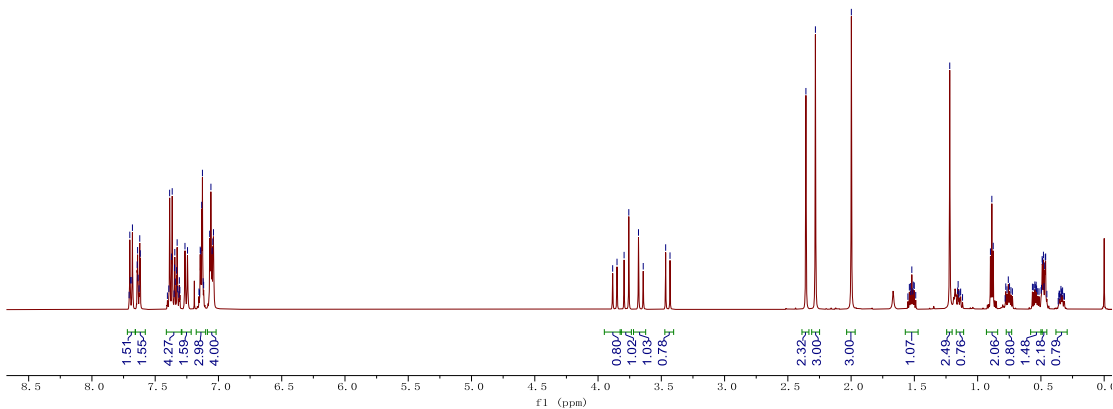

209.902  
207.079

144.486  
143.917  
139.379  
138.925  
136.737  
136.440  
130.700  
129.917  
129.592  
128.837  
128.040  
127.757  
127.719  
127.679  
127.562  
127.203

77.518 CDCl<sub>3</sub>  
77.200 CDCl<sub>3</sub>  
76.862 CDCl<sub>3</sub>

65.640  
63.791

54.307  
49.534

21.714  
21.613  
20.332  
19.306  
18.705  
17.395  
12.728  
11.465  
3.191  
2.410

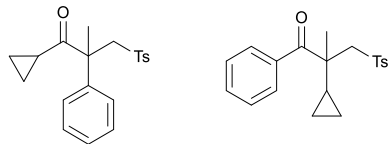

3ra

3ra'

<sup>13</sup>C NMR (101 MHz, CDCl<sub>3</sub>)

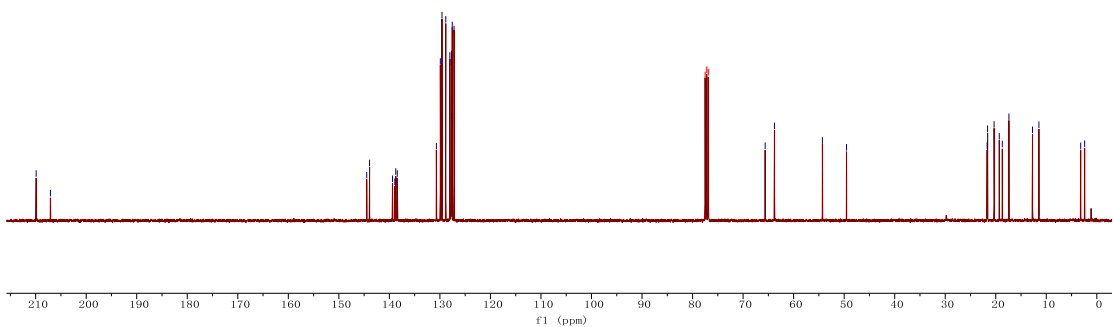

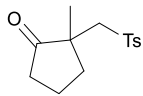

**3sa** <sup>1</sup>H NMR (400 MHz, CDCl<sub>3</sub>)

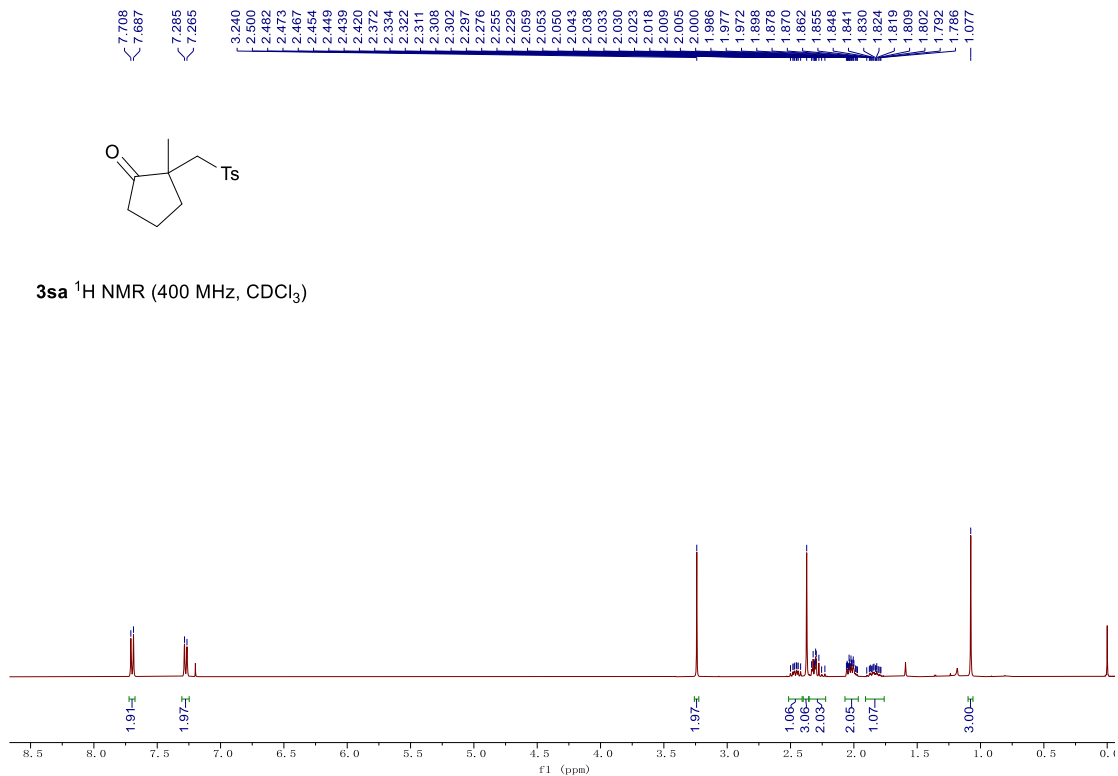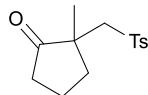

**3sa** <sup>13</sup>C NMR (101 MHz, CDCl<sub>3</sub>)

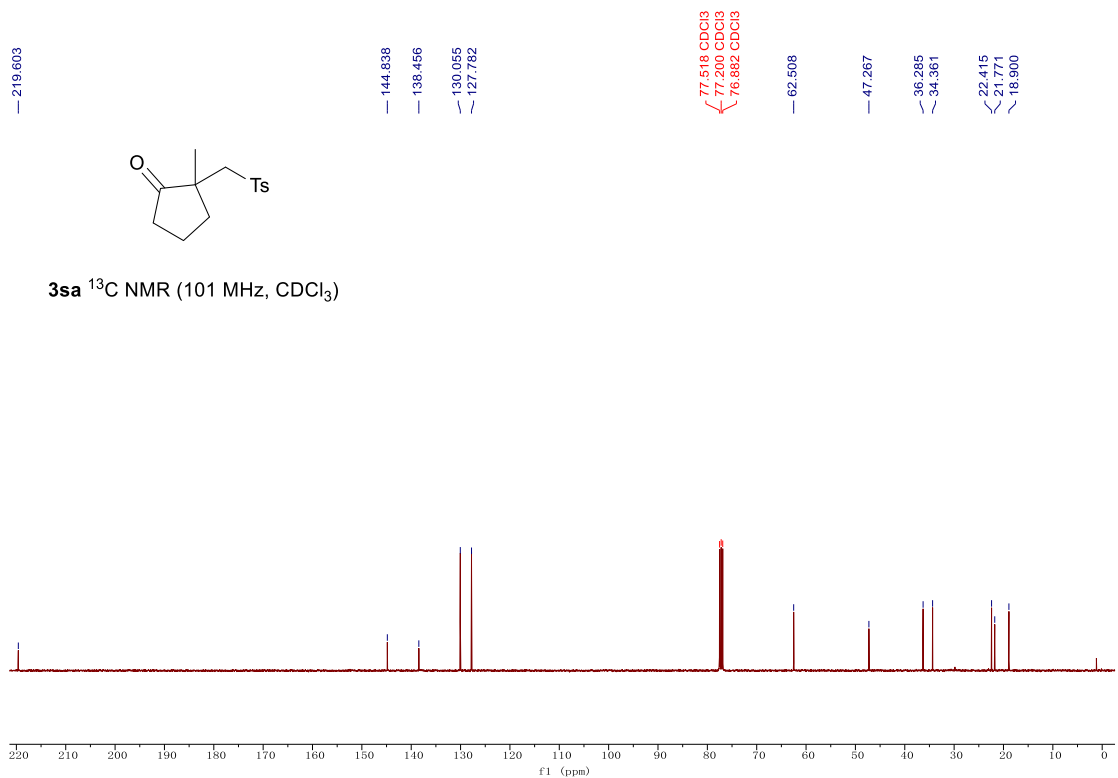

7.732  
7.711  
7.282  
7.262

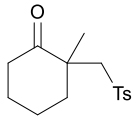

3ta <sup>1</sup>H NMR (400 MHz, CDCl<sub>3</sub>)

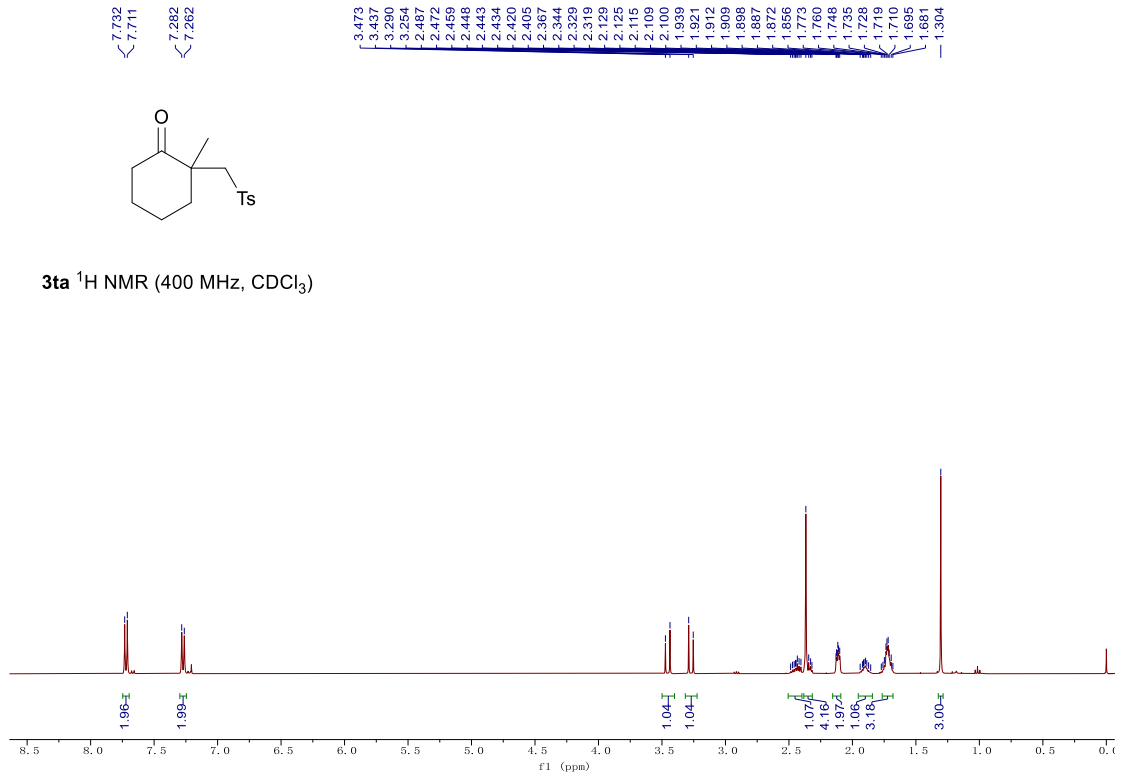

212.125

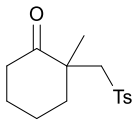

3ta <sup>13</sup>C NMR (101 MHz, CDCl<sub>3</sub>)

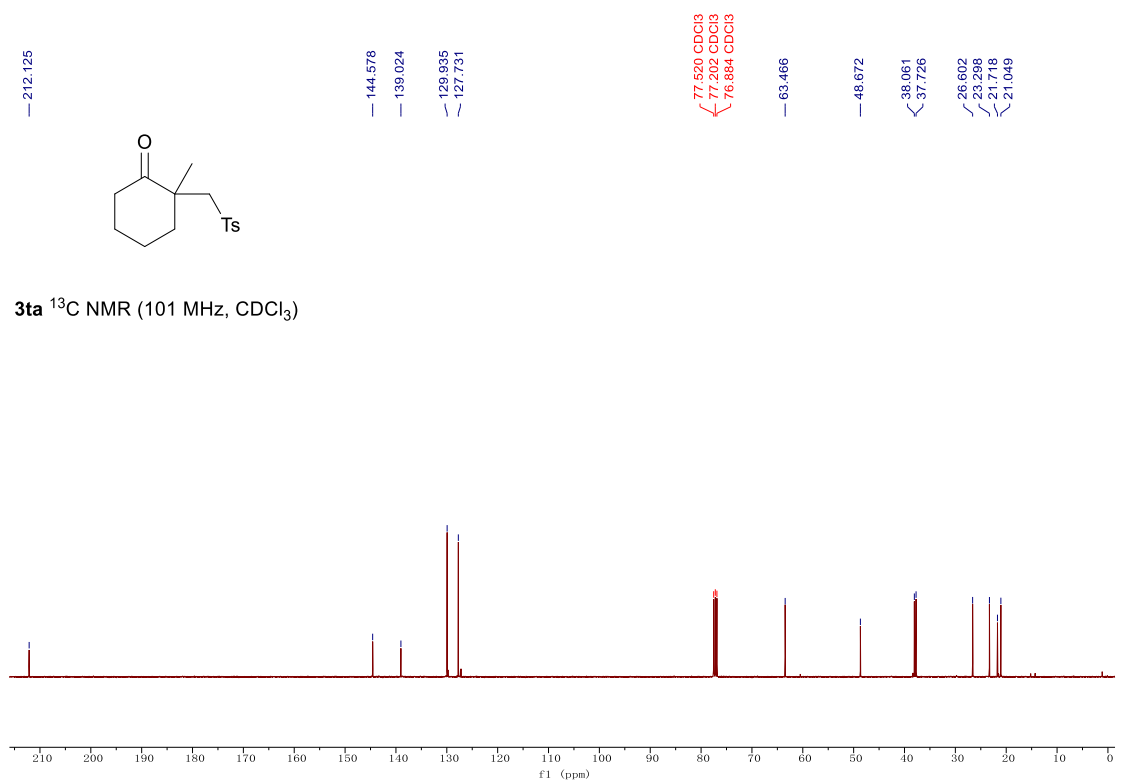

7.707  
7.686  
7.278  
7.259

3.341  
3.305  
3.294  
3.258  
2.657  
2.634  
2.626  
2.620  
2.603  
2.596  
2.559  
2.551  
2.536  
2.529  
2.521  
2.511  
2.498  
2.473  
2.368  
1.724  
1.700  
1.686  
1.665  
1.655  
1.626  
1.613  
1.602  
1.580  
1.564  
1.550  
1.539  
1.426  
1.416  
1.373

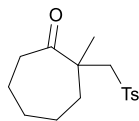

**3ua**  $^1\text{H}$  NMR (400 MHz,  $\text{CDCl}_3$ )

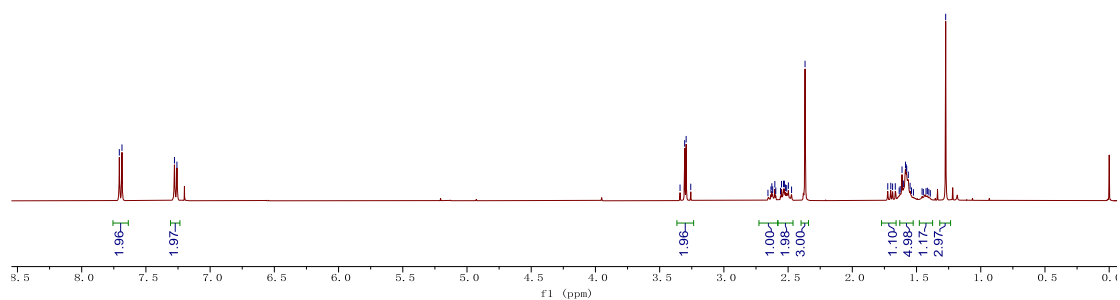

214.876

144.688

138.809

130.009

127.772

77.521  $\text{CDCl}_3$

77.204  $\text{CDCl}_3$

76.886  $\text{CDCl}_3$

63.245

50.744

40.827

35.220

30.468

25.914

24.544

24.206

21.760

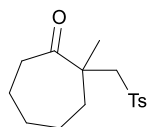

**3ua**  $^{13}\text{C}$  NMR (101 MHz,  $\text{CDCl}_3$ )

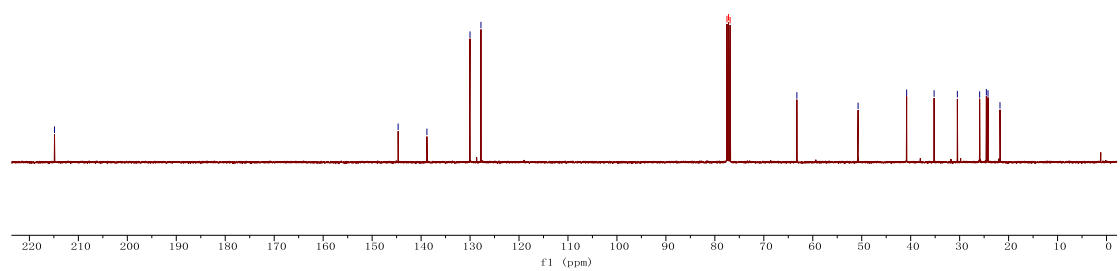

7.730  
7.709  
7.284  
7.265  
3.507  
3.470  
3.097  
3.061  
2.744  
2.736  
2.715  
2.706  
2.686  
2.678  
2.370  
2.350  
2.337  
2.322  
2.310  
2.299  
2.164  
2.165  
2.157  
2.156  
2.146  
2.138  
2.129  
2.114  
2.095  
2.086  
2.076  
2.054  
1.816  
1.808  
1.788  
1.779  
1.772  
1.704  
1.689  
1.668  
1.662  
1.656  
1.650  
1.640  
1.632  
1.618  
1.610  
1.604  
1.591  
1.581  
1.576  
1.547  
1.535  
1.510  
1.504  
1.493  
1.485  
1.474  
1.462  
1.448  
1.434  
1.372  
1.278  
1.272  
1.248  
1.243  
1.213  
1.0814  
0.804  
0.794  
0.783

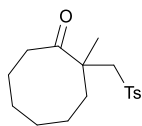

**3va**  $^1\text{H}$  NMR (400 MHz,  $\text{CDCl}_3$ )

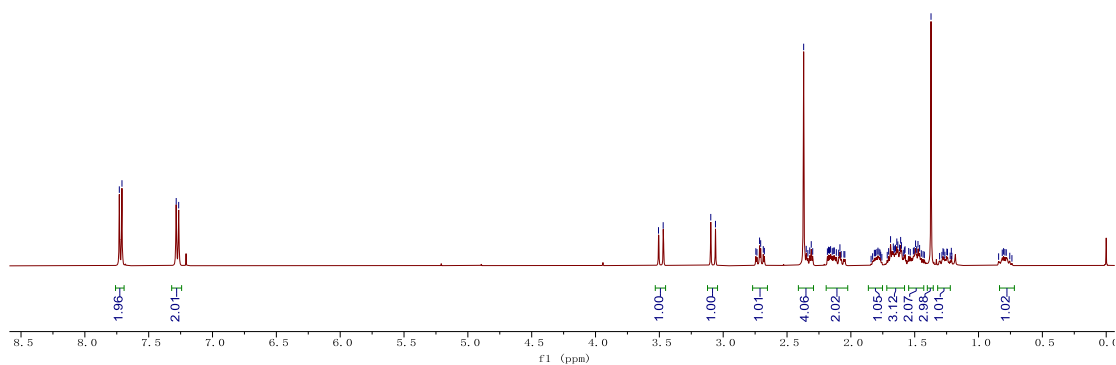

— 217.476

— 144.625  
— 139.070

— 129.985  
— 127.685

77.517  $\text{CDCl}_3$   
77.199  $\text{CDCl}_3$   
76.881  $\text{CDCl}_3$

— 59.124  
— 50.557

35.861  
32.453  
30.162  
26.180  
25.028  
24.368  
22.656  
21.719

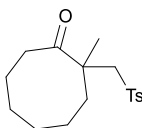

**3va**  $^{13}\text{C}$  NMR (101 MHz,  $\text{CDCl}_3$ )

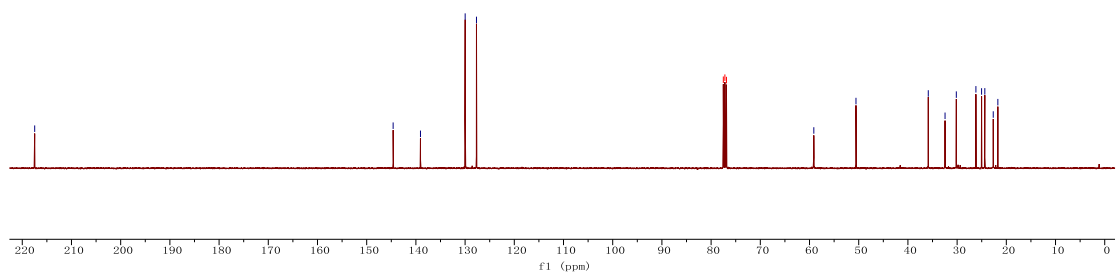

7.726  
7.705  
7.282  
7.265  
3.447  
3.441  
3.162  
3.126  
2.851  
2.842  
2.825  
2.815  
2.805  
2.789  
2.779  
2.370  
2.231  
2.222  
2.214  
2.204  
2.194  
2.185  
2.177  
2.167  
2.051  
2.043  
2.031  
2.026  
2.014  
2.004  
1.994  
1.984  
1.796  
1.779  
1.767  
1.758  
1.742  
1.730  
1.717  
1.697  
1.687  
1.680  
1.670  
1.655  
1.487  
1.480  
1.467  
1.459  
1.451  
1.433  
1.346  
1.339  
1.334  
1.330  
1.310  
1.285  
1.285  
1.285  
1.276  
1.271  
1.259  
1.247  
1.235  
1.143  
1.126  
1.110

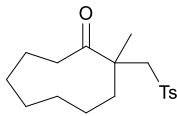

3wa  $^1\text{H}$  NMR (400 MHz,  $\text{CDCl}_3$ )

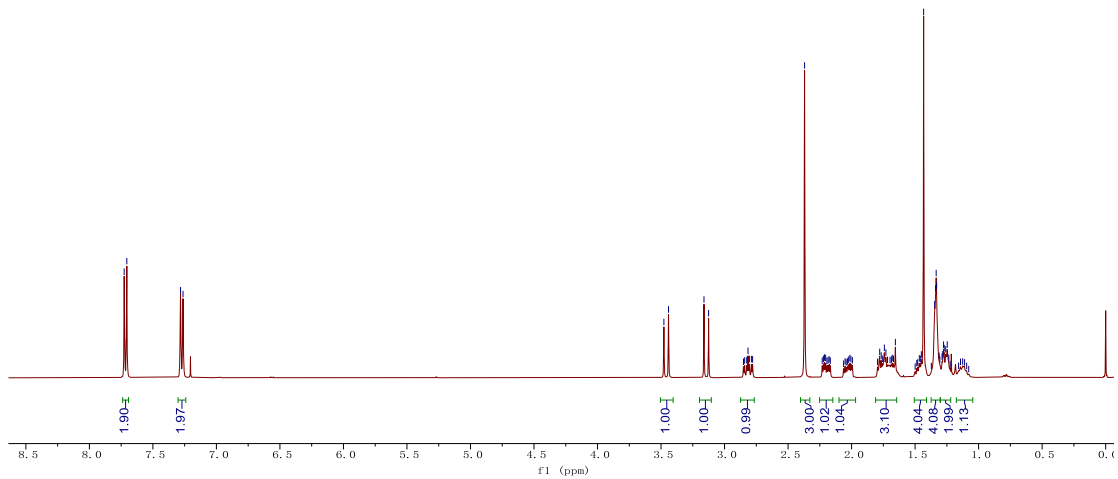

215.231

144.588

139.087

129.982

127.704

77.518  $\text{CDCl}_3$

77.199  $\text{CDCl}_3$

76.881  $\text{CDCl}_3$

61.075

51.990

34.199

33.685

25.311

24.623

23.160

22.382

21.735

21.266

20.285

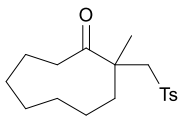

3wa  $^{13}\text{C}$  NMR (101 MHz,  $\text{CDCl}_3$ )

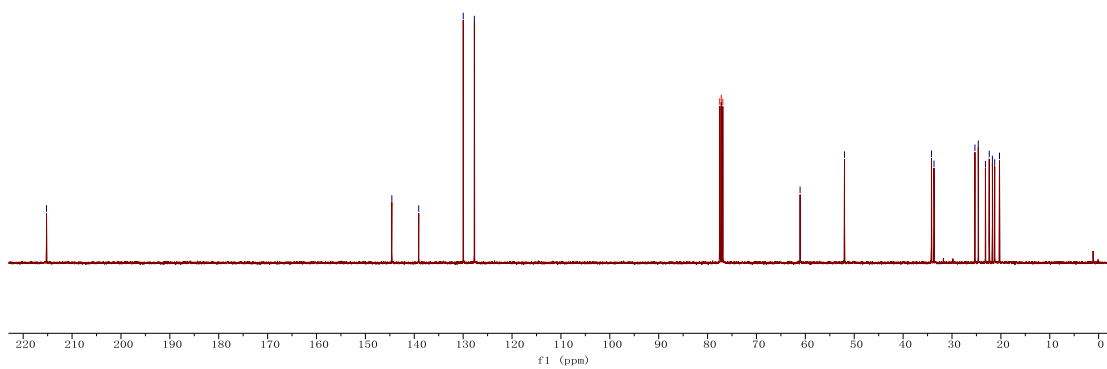



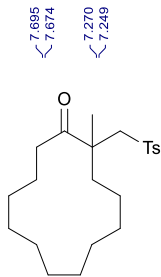

3xa <sup>1</sup>H NMR (400 MHz, CDCl<sub>3</sub>)

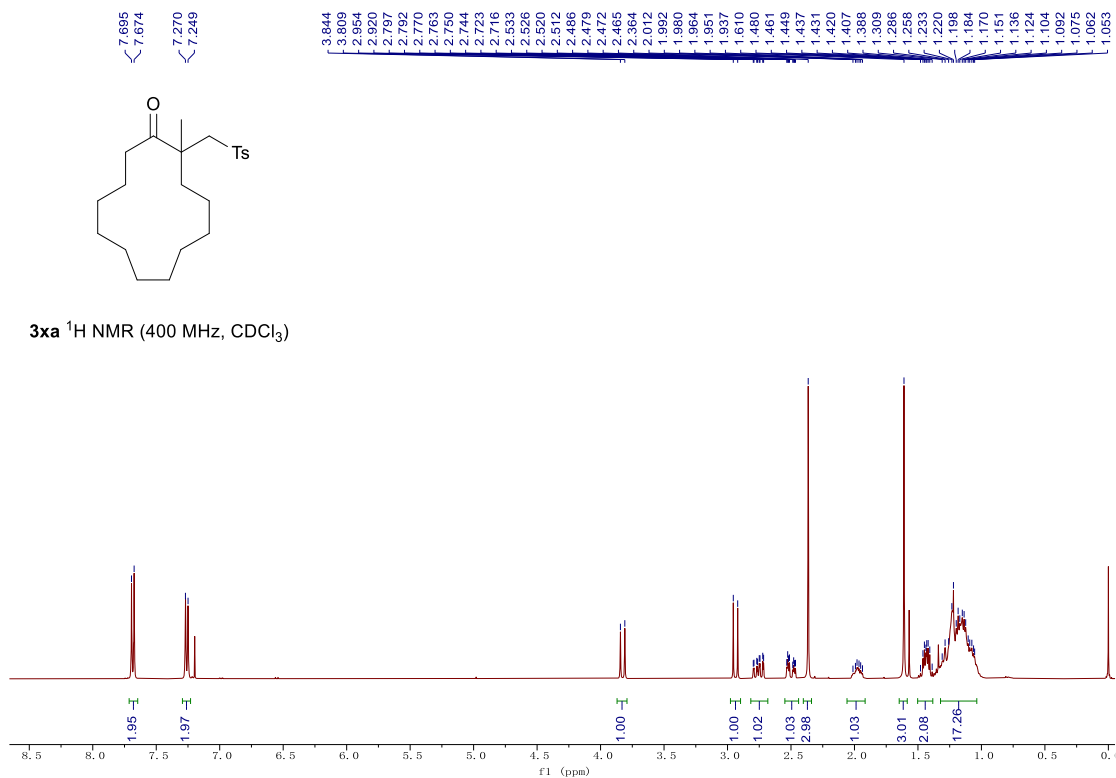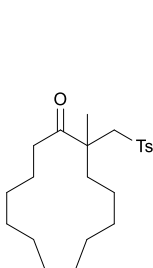

3xa <sup>13</sup>C NMR (101 MHz, CDCl<sub>3</sub>)

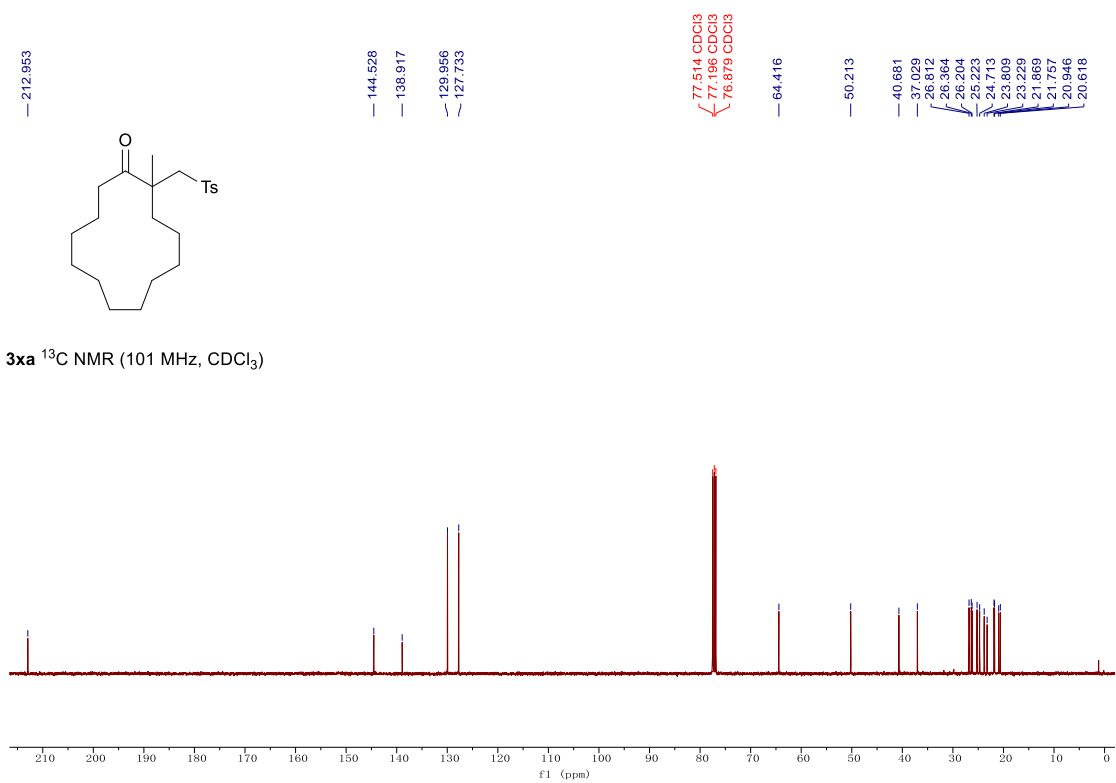

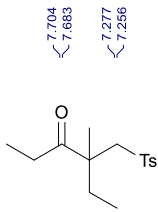

3ya  $^1\text{H}$  NMR (400 MHz,  $\text{CDCl}_3$ )

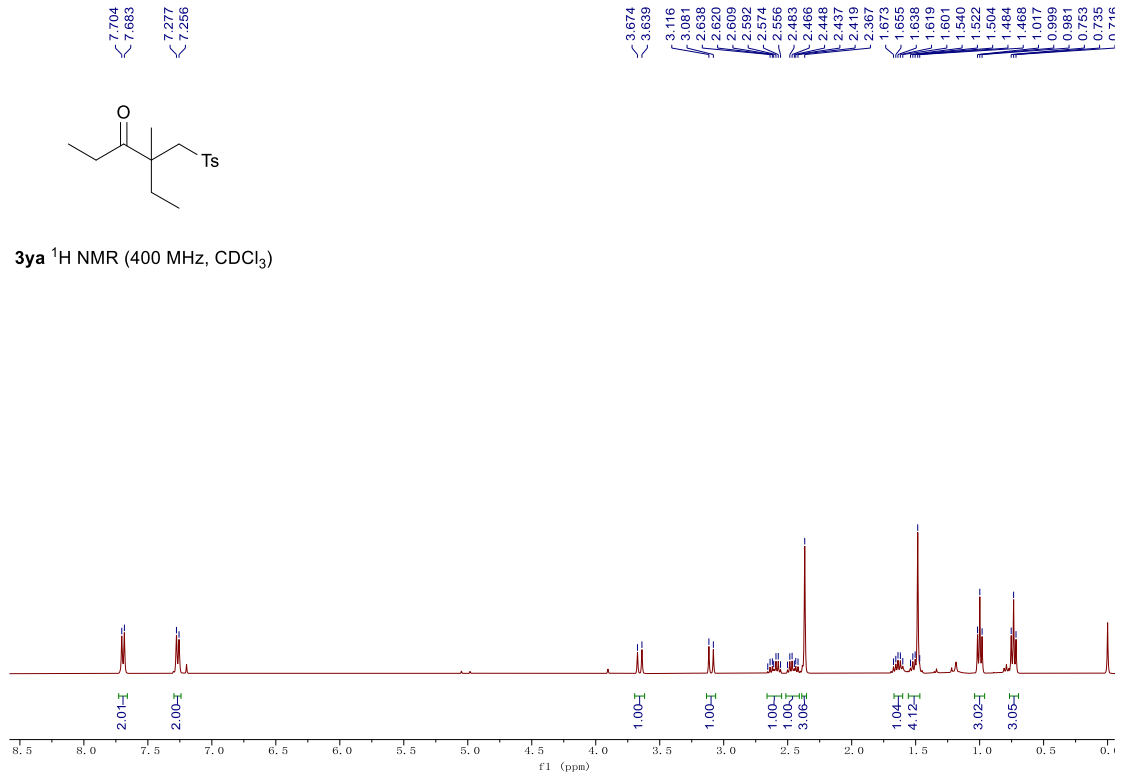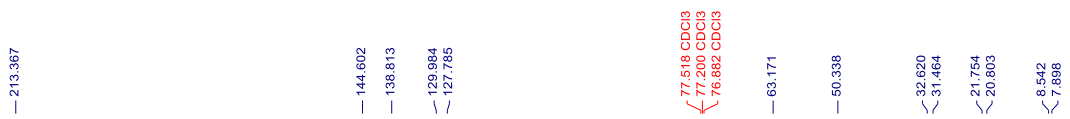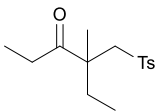

3ya  $^{13}\text{C}$  NMR (101 MHz,  $\text{CDCl}_3$ )

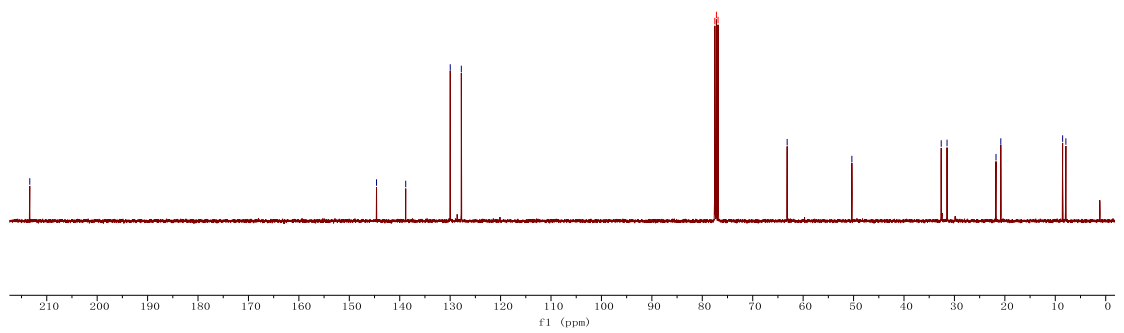

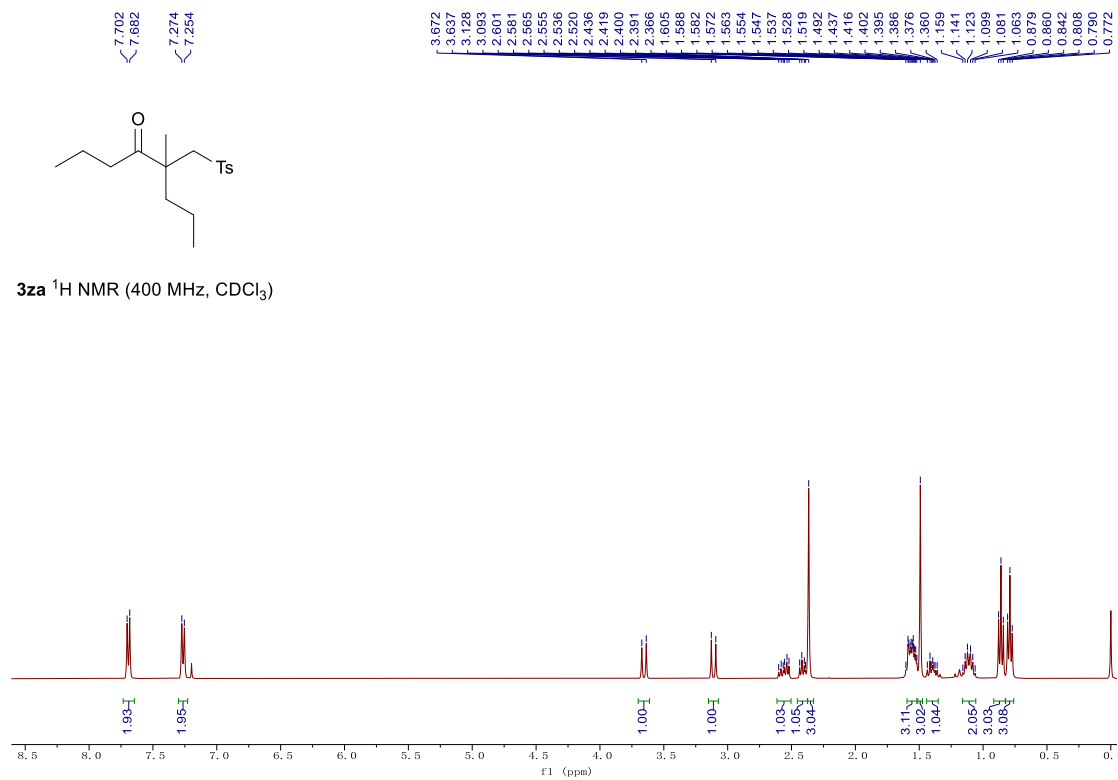

3za  $^1\text{H}$  NMR (400 MHz,  $\text{CDCl}_3$ )

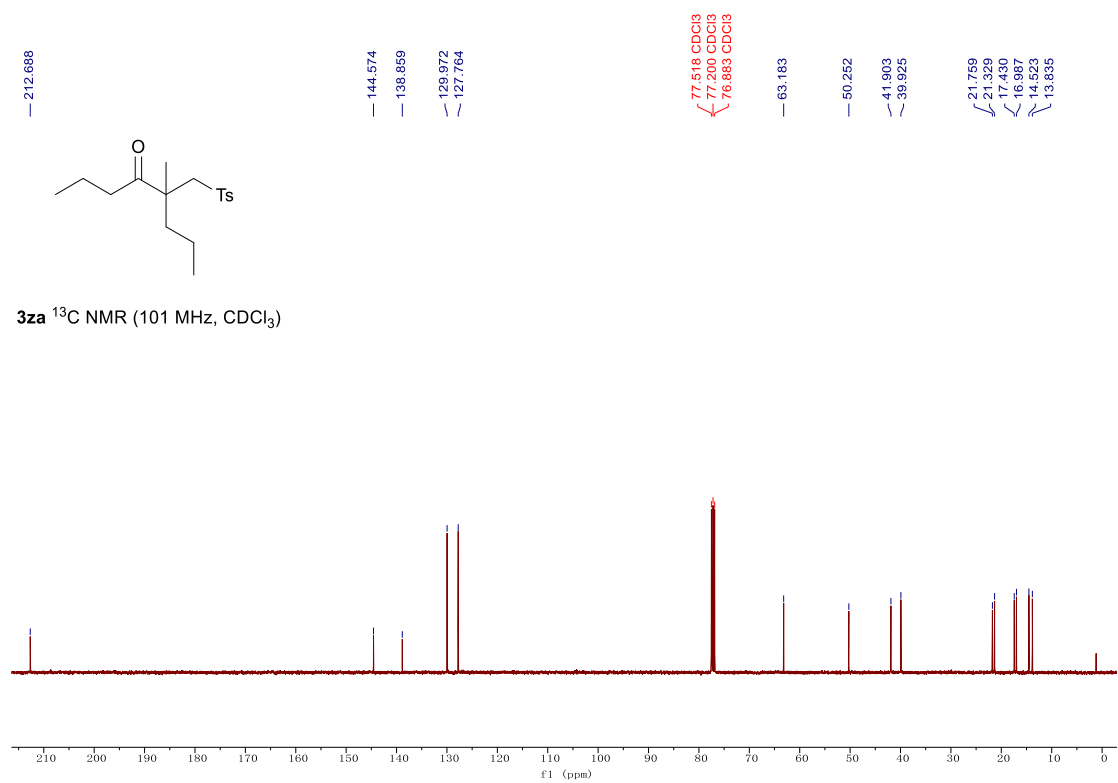

3za  $^{13}\text{C}$  NMR (101 MHz,  $\text{CDCl}_3$ )

7.602  
7.582  
7.453  
7.434  
7.416  
7.334  
7.316  
7.285  
7.265  
7.244  
7.223  
7.214  
7.203  
7.192  
7.184  
7.174  
7.151  
7.133  
7.112

4.010  
3.974  
3.780  
3.744

2.041

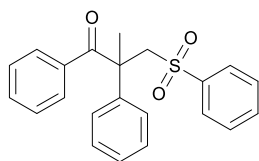

**3ab**  $^1\text{H}$  NMR (400 MHz,  $\text{CDCl}_3$ )

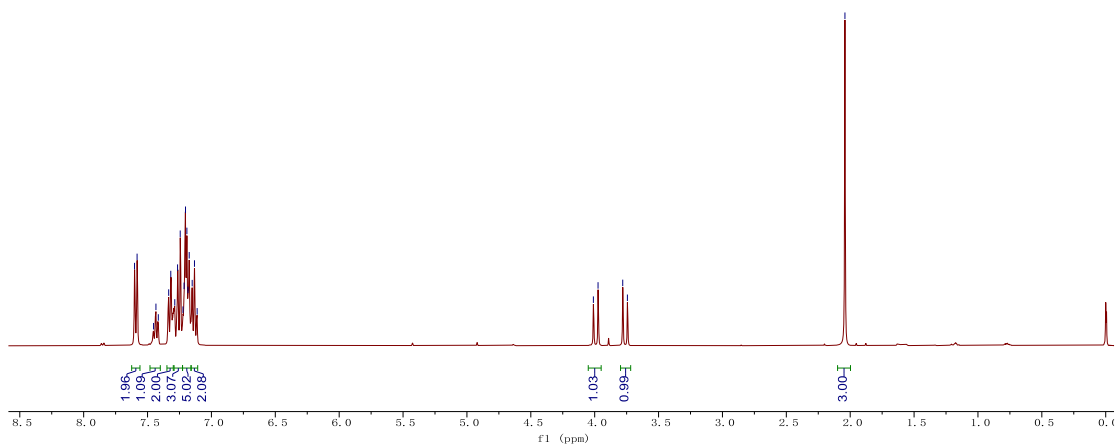

201.185

141.585  
139.247  
136.186  
133.186  
131.976  
129.349  
129.100  
128.207  
128.151  
127.577  
126.758

77.516  $\text{CDCl}_3$   
77.203  $\text{CDCl}_3$   
76.883  $\text{CDCl}_3$

65.603

53.754

22.196

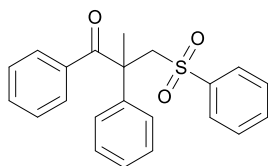

**3ab**  $^{13}\text{C}$  NMR (101 MHz,  $\text{CDCl}_3$ )

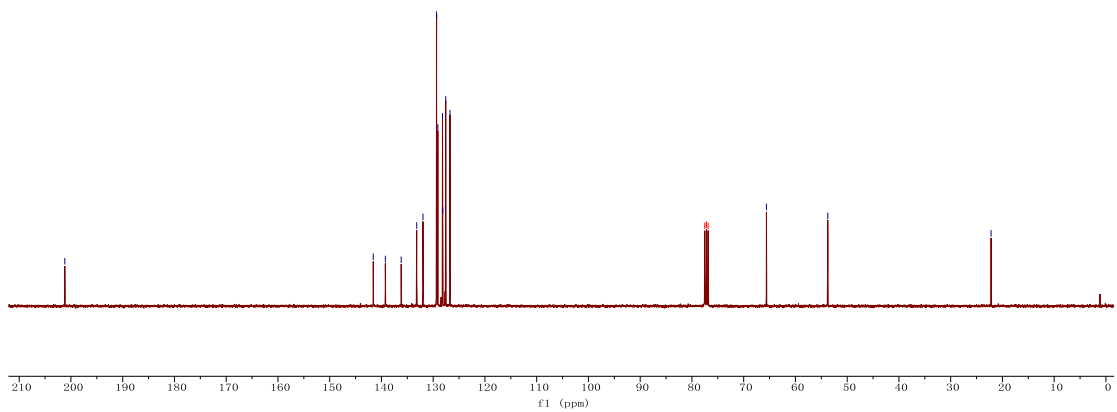

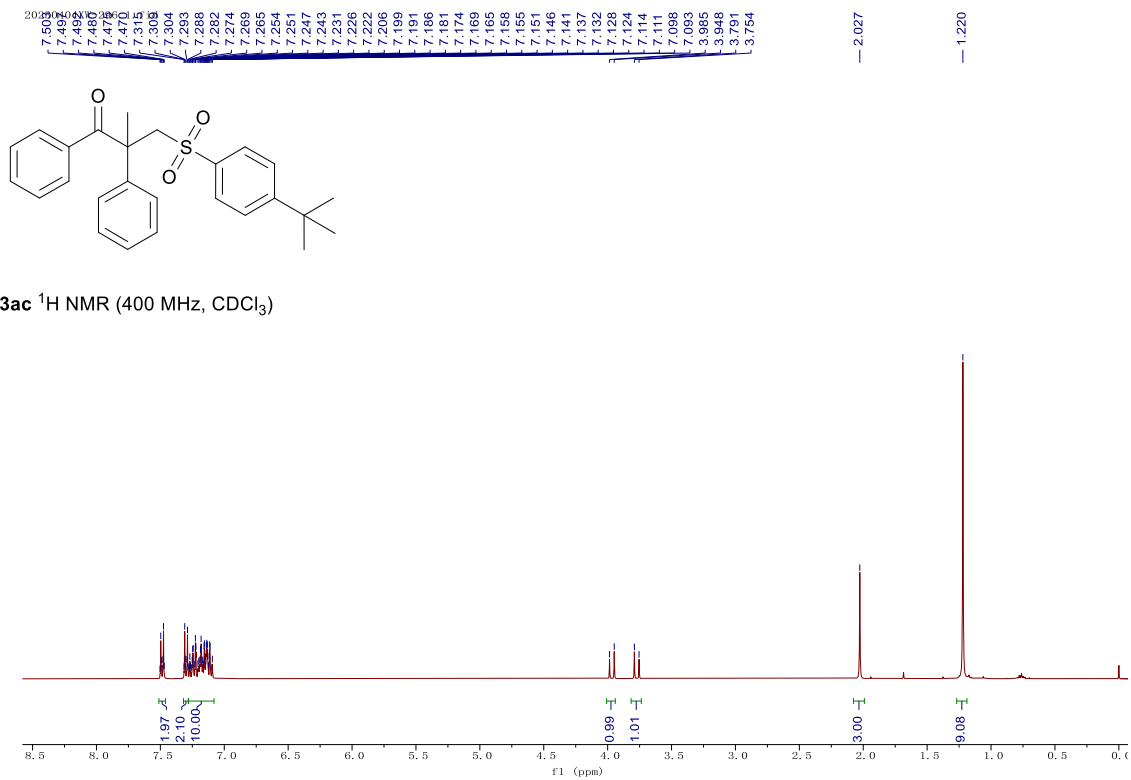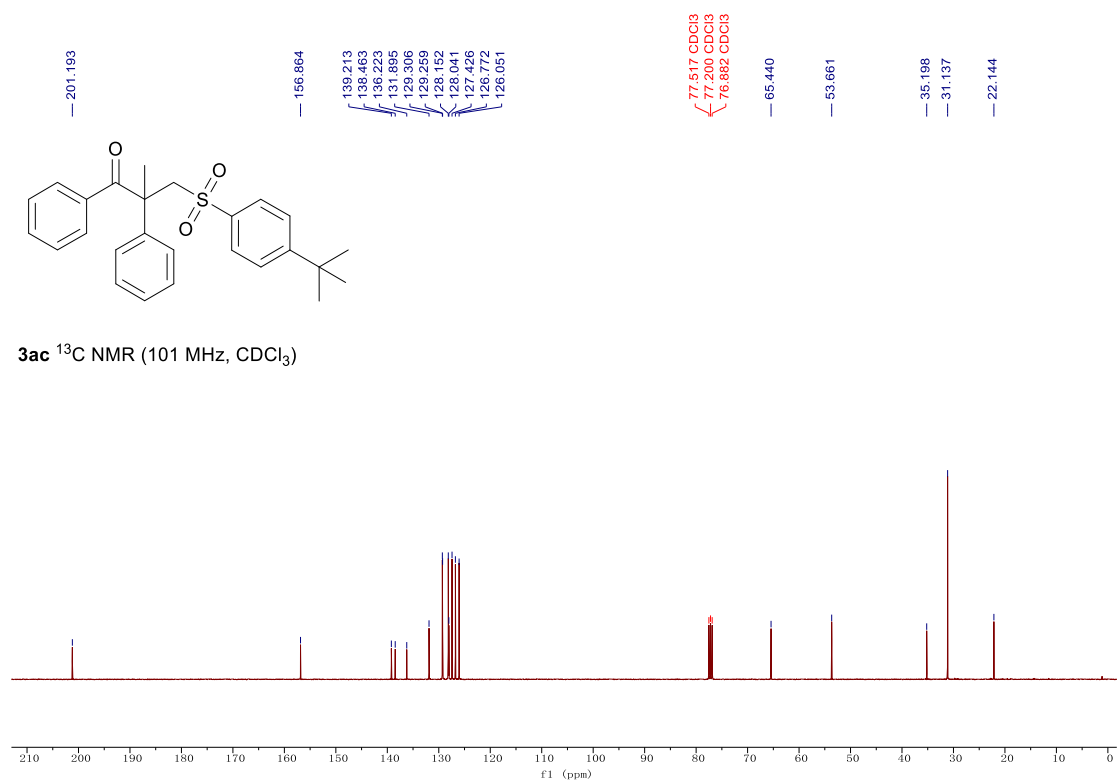

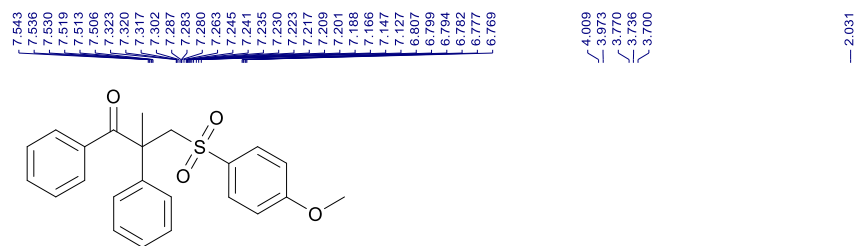

**3ad**  $^1\text{H}$  NMR (400 MHz,  $\text{CDCl}_3$ )

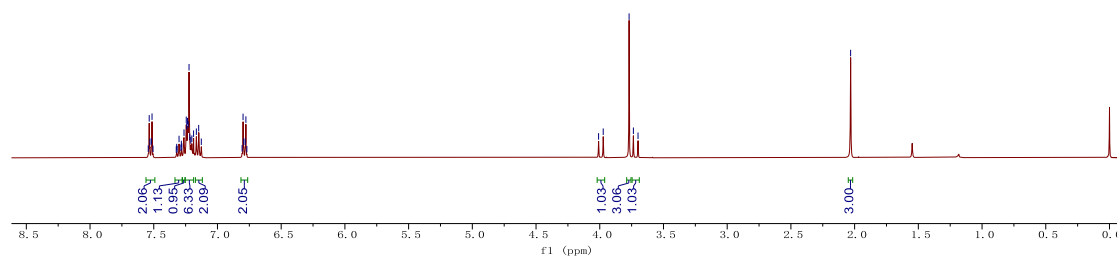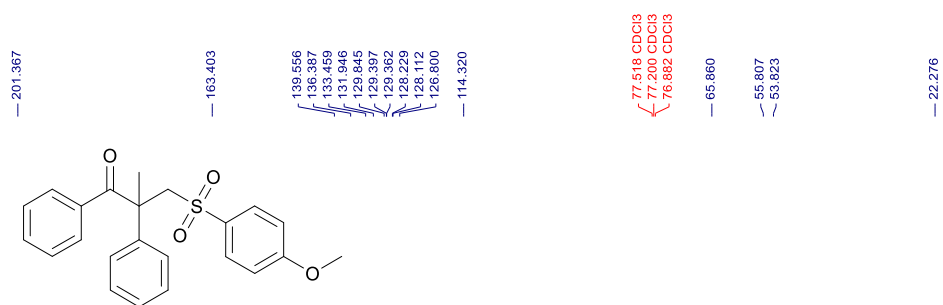

**3ad**  $^{13}\text{C}$  NMR (101 MHz,  $\text{CDCl}_3$ )

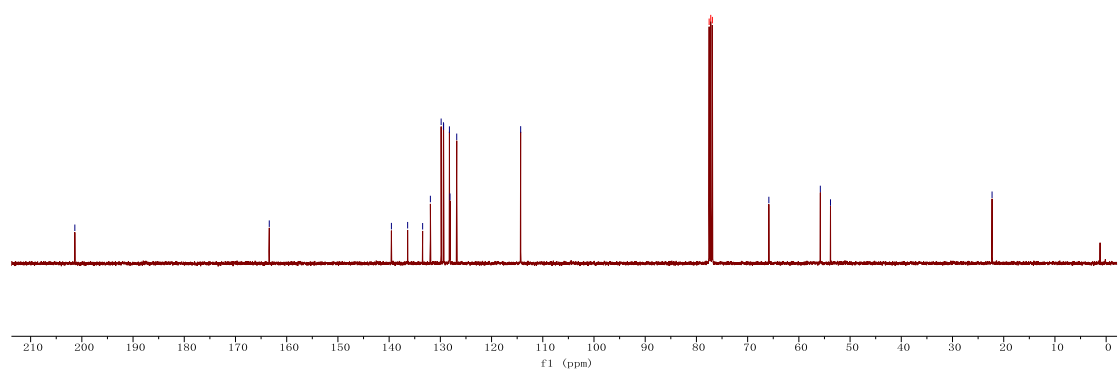

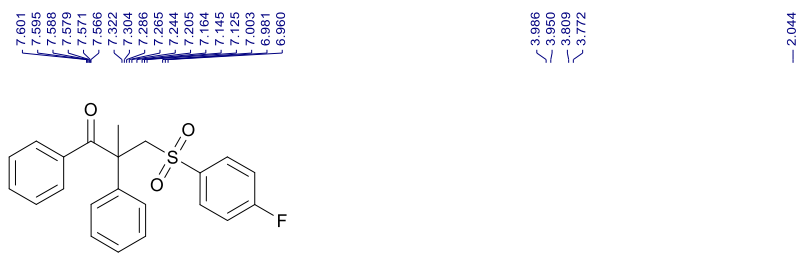

**3ae**  $^1\text{H}$  NMR (400 MHz,  $\text{CDCl}_3$ )

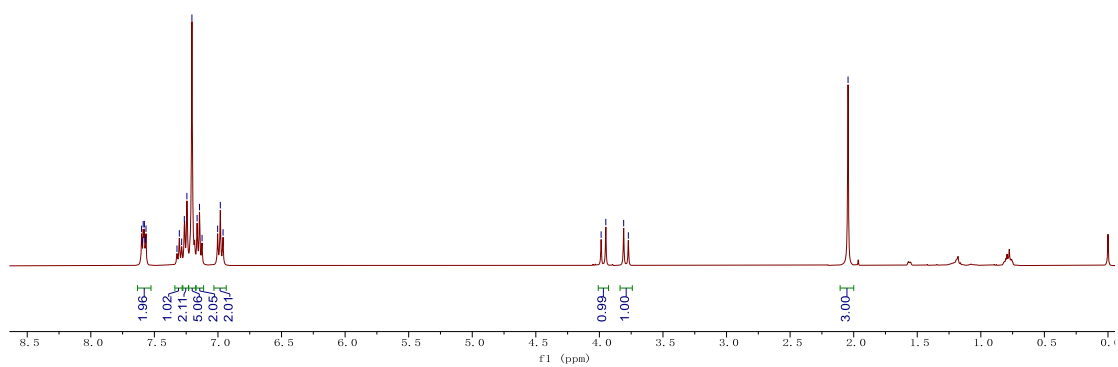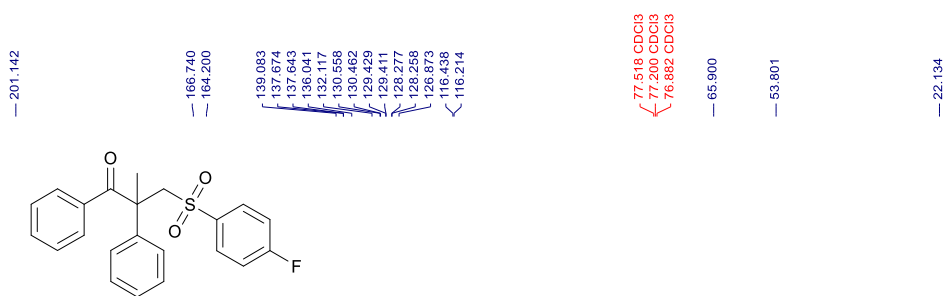

**3ae**  $^{13}\text{C}$  NMR (101 MHz,  $\text{CDCl}_3$ )

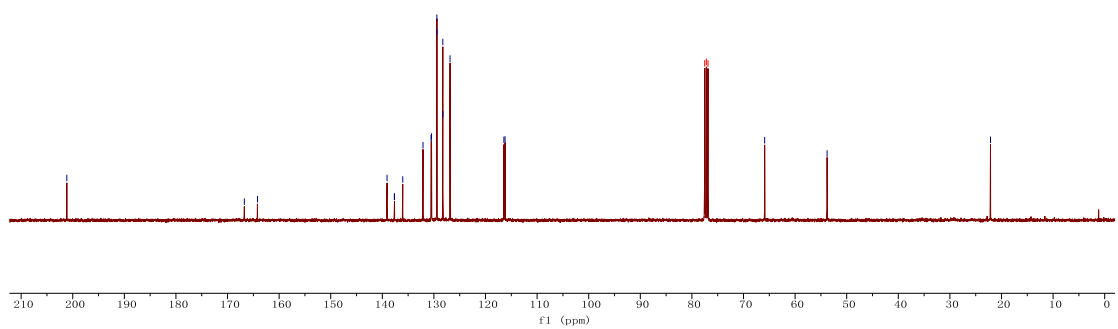

7.509  
7.502  
7.498  
7.486  
7.481  
7.475  
7.313  
7.295  
7.285  
7.278  
7.273  
7.261  
7.257  
7.251  
7.243  
7.238  
7.234  
7.191  
7.155  
7.137  
7.116

3.977  
3.940  
3.812  
3.776

2.032

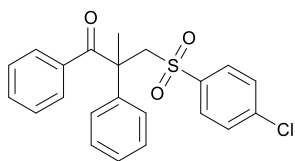

**3af**  $^1\text{H}$  NMR (400 MHz,  $\text{CDCl}_3$ )

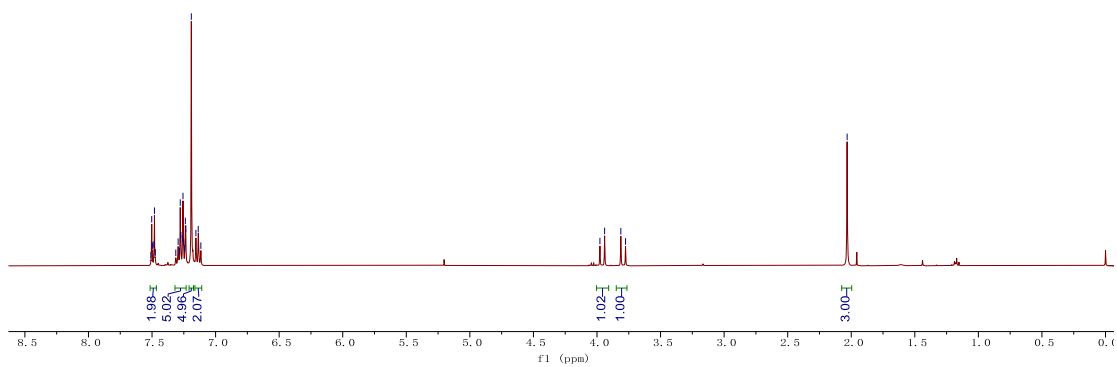

201.028

138.935  
138.808  
138.962  
135.942  
132.102  
128.401  
128.379  
128.323  
128.116  
128.215  
128.220  
126.831

77.515  $\text{CDCl}_3$   
77.197  $\text{CDCl}_3$   
76.878  $\text{CDCl}_3$

65.798

53.749

22.097

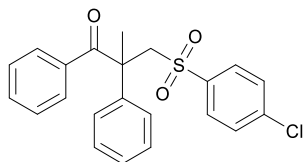

**3af**  $^{13}\text{C}$  NMR (101 MHz,  $\text{CDCl}_3$ )

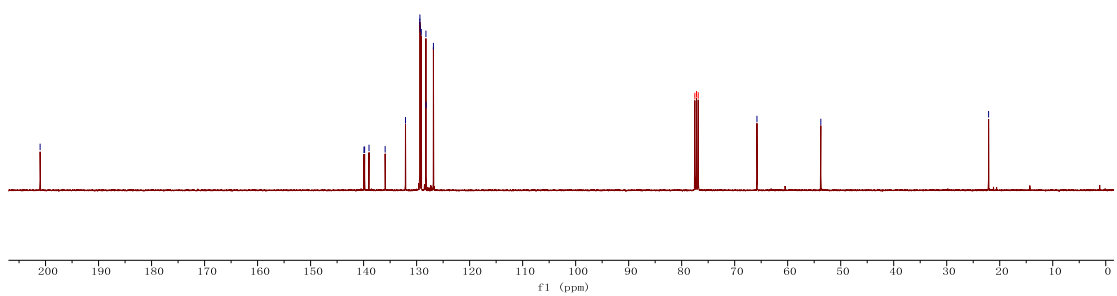



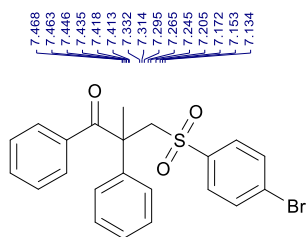

**3ag**  $^1\text{H}$  NMR (400 MHz,  $\text{CDCl}_3$ )

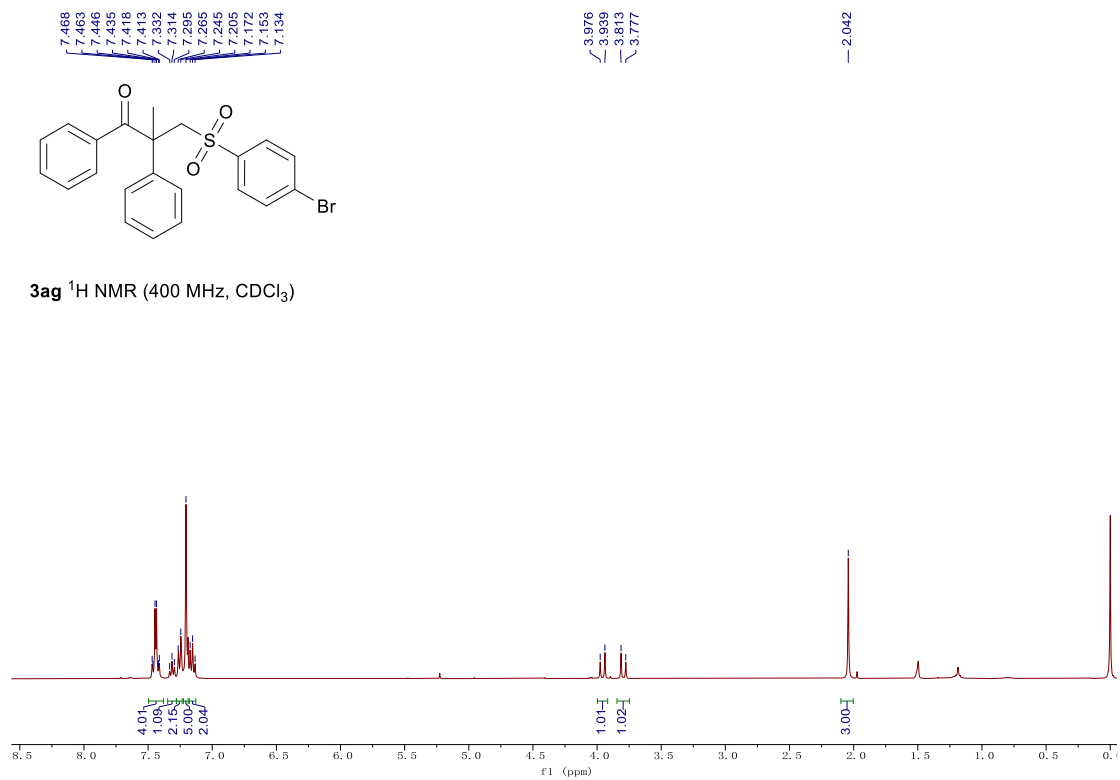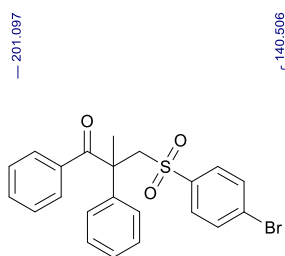

**3ag**  $^{13}\text{C}$  NMR (101 MHz,  $\text{CDCl}_3$ )

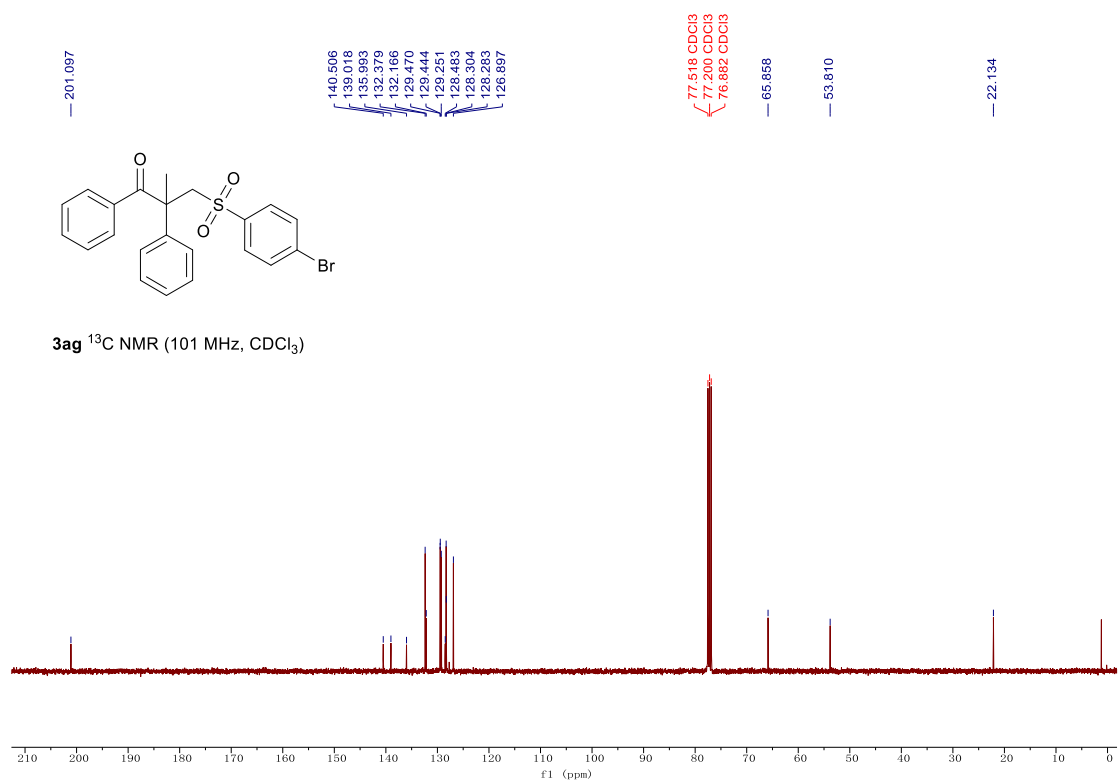

7.680  
7.664  
7.657  
7.653  
7.647  
7.327  
7.323  
7.320  
7.310  
7.305  
7.301  
7.290  
7.287  
7.283  
7.276  
7.272  
7.260  
7.255  
7.250  
7.238  
7.235  
7.230  
7.215  
7.206  
7.195  
7.189  
7.186  
7.176  
7.164  
7.146  
7.125  
3.969  
3.932  
3.810  
3.773

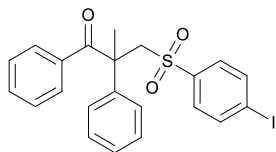

**3ah**  $^1\text{H}$  NMR (400 MHz,  $\text{CDCl}_3$ )

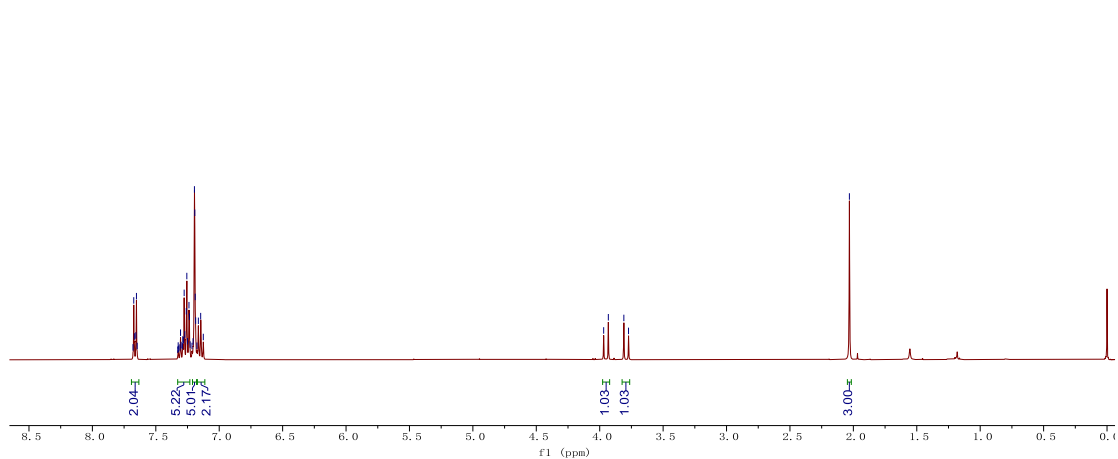

201.062

141.140  
139.006  
138.339  
135.995  
132.134  
129.458  
129.422  
129.057  
128.284  
128.242  
126.877

101.052

77.517  $\text{CDCl}_3$   
77.200  $\text{CDCl}_3$   
76.882  $\text{CDCl}_3$

65.792

53.783

22.123

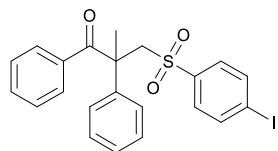

**3ah**  $^{13}\text{C}$  NMR (101 MHz,  $\text{CDCl}_3$ )

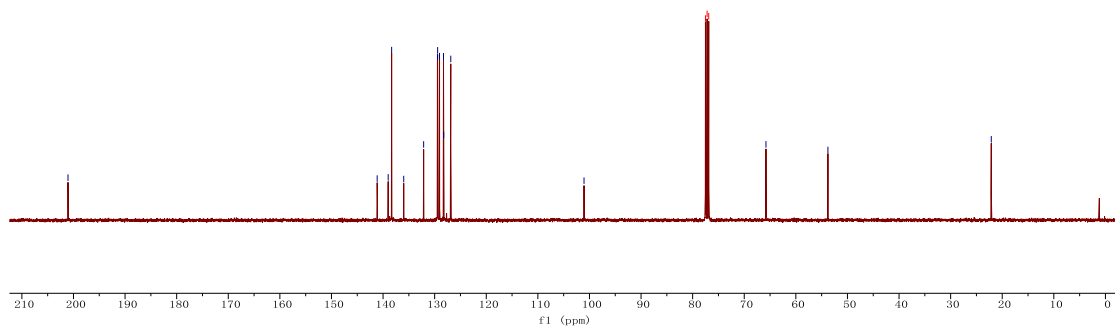

7.685  
7.664  
7.568  
7.547  
7.533  
7.330  
7.327  
7.316  
7.312  
7.309  
7.297  
7.285  
7.280  
7.265  
7.256  
7.246  
7.241  
7.237  
7.231  
7.163  
7.145  
7.127

3.876  
3.839  
3.905  
3.868

2.057

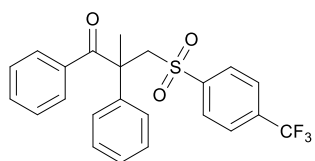

**3ai**  $^1\text{H}$  NMR (400 MHz,  $\text{CDCl}_3$ )

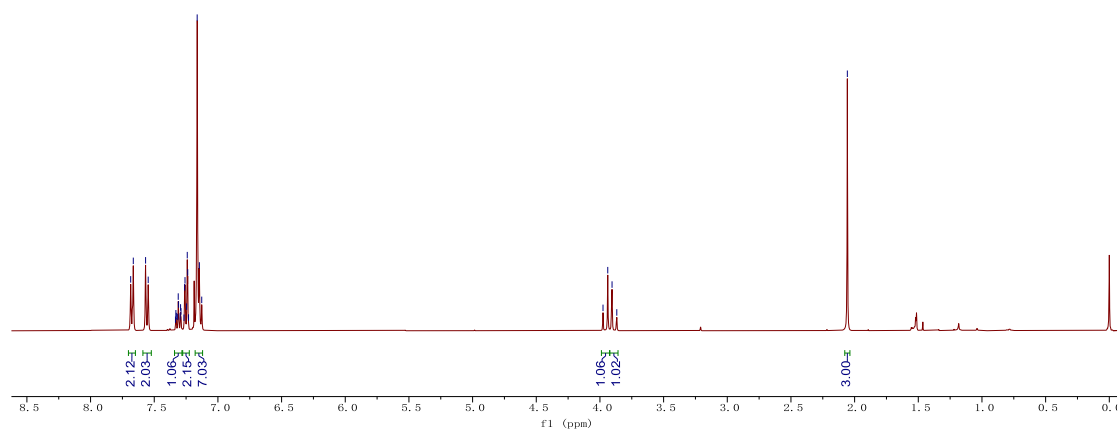

200.939

144.757  
138.682  
137.151  
134.646  
132.257  
129.482  
129.435  
128.397  
128.323  
128.281  
127.329  
126.970  
126.231  
126.195  
126.157  
126.120  
124.672  
121.957  
119.235

77.519  $\text{CDCl}_3$   
77.202  $\text{CDCl}_3$   
76.864  $\text{CDCl}_3$

65.748

53.777

22.054

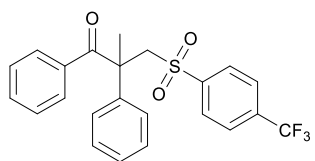

**3ai**  $^{13}\text{C}$  NMR (101 MHz,  $\text{CDCl}_3$ )

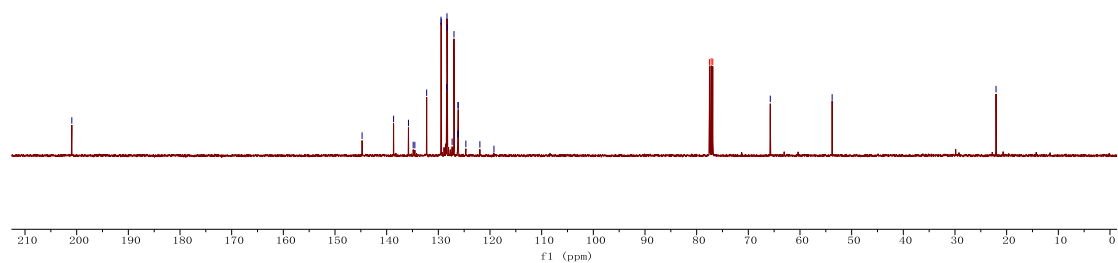

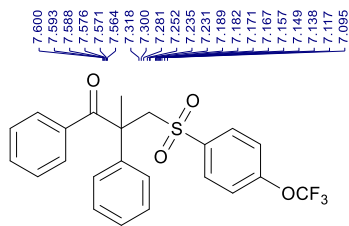

**3aj**  $^1\text{H}$  NMR (400 MHz,  $\text{CDCl}_3$ )

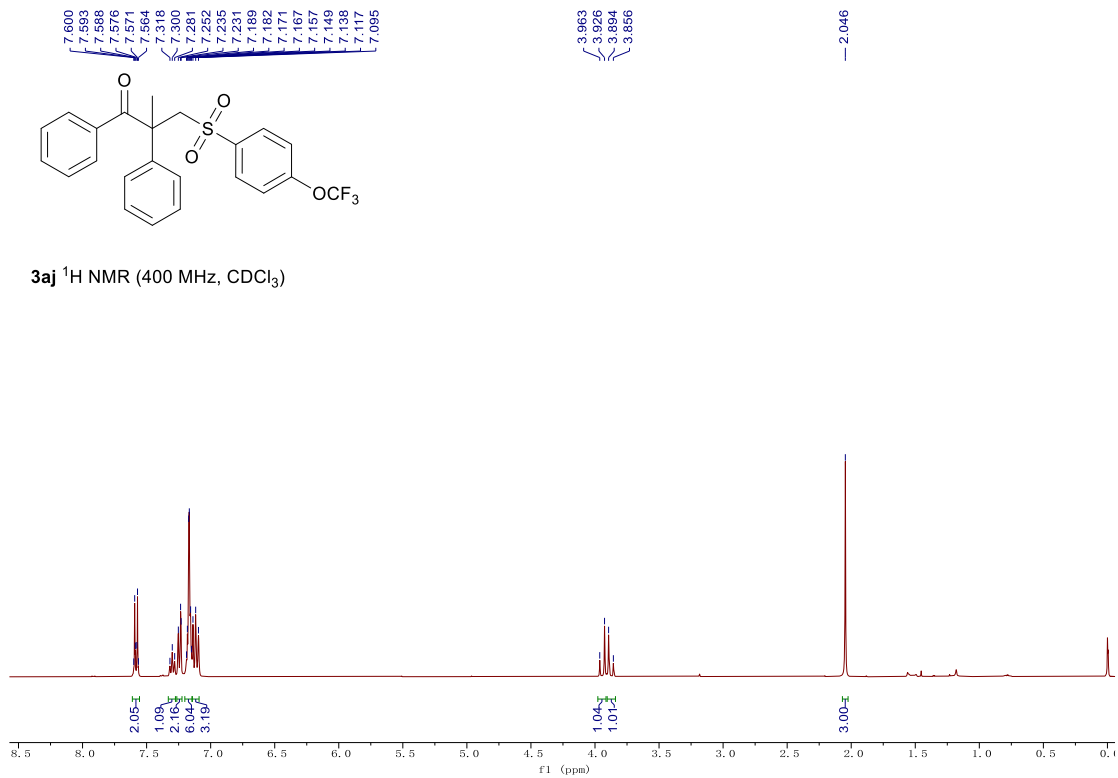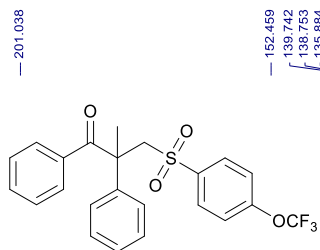

**3aj**  $^{13}\text{C}$  NMR (101 MHz,  $\text{CDCl}_3$ )

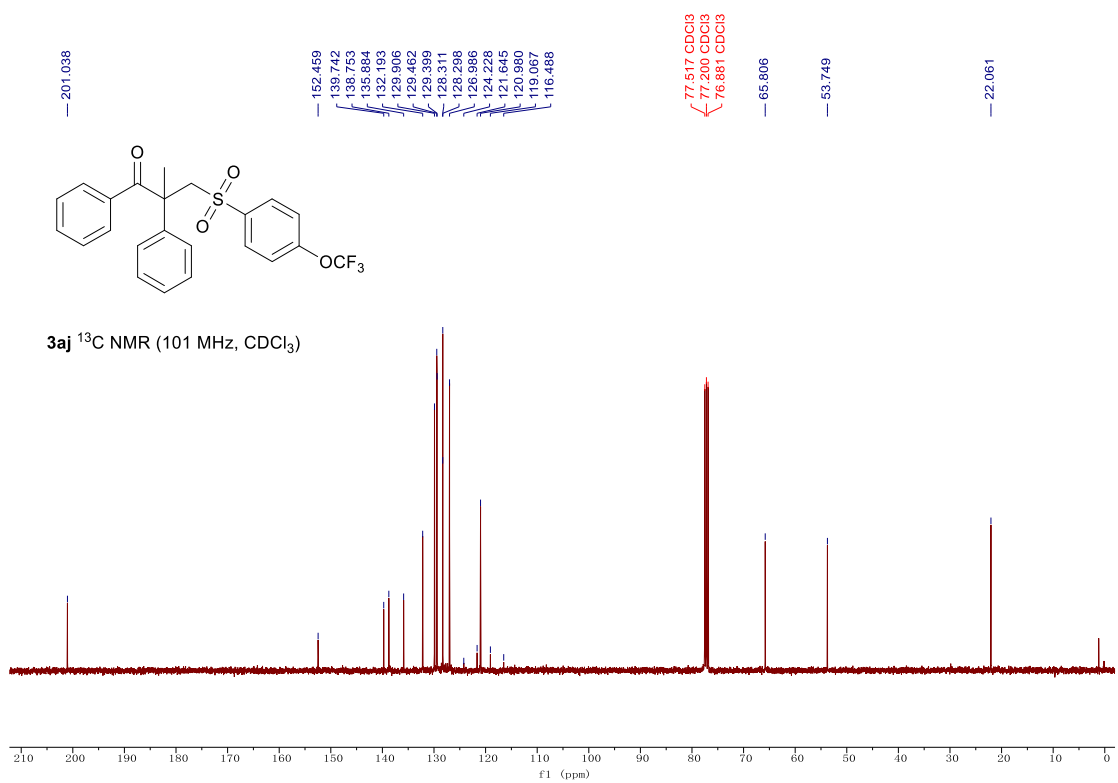

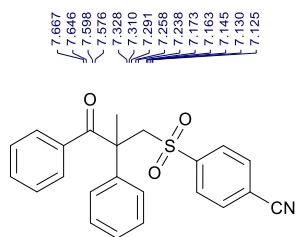

**3ak**  $^1\text{H}$  NMR (400 MHz,  $\text{CDCl}_3$ )

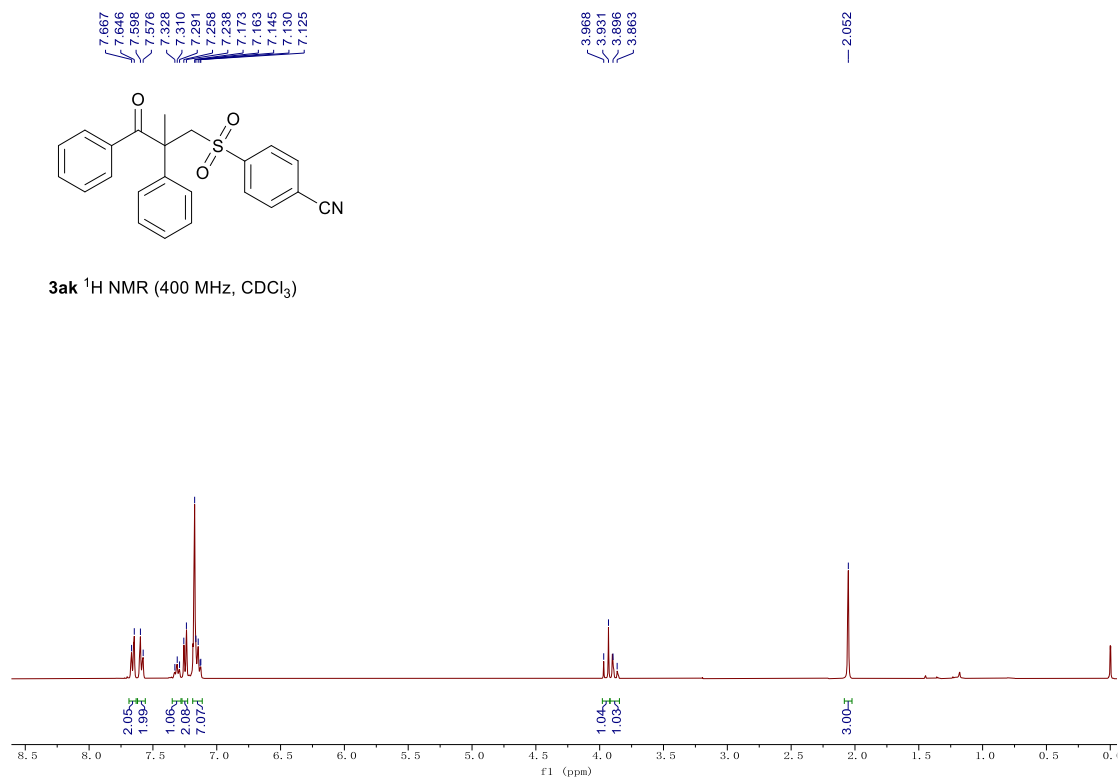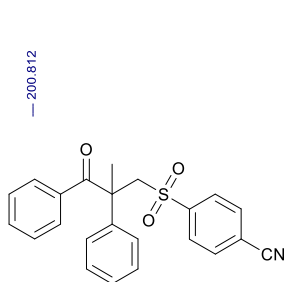

**3ak**  $^{13}\text{C}$  NMR (101 MHz,  $\text{CDCl}_3$ )

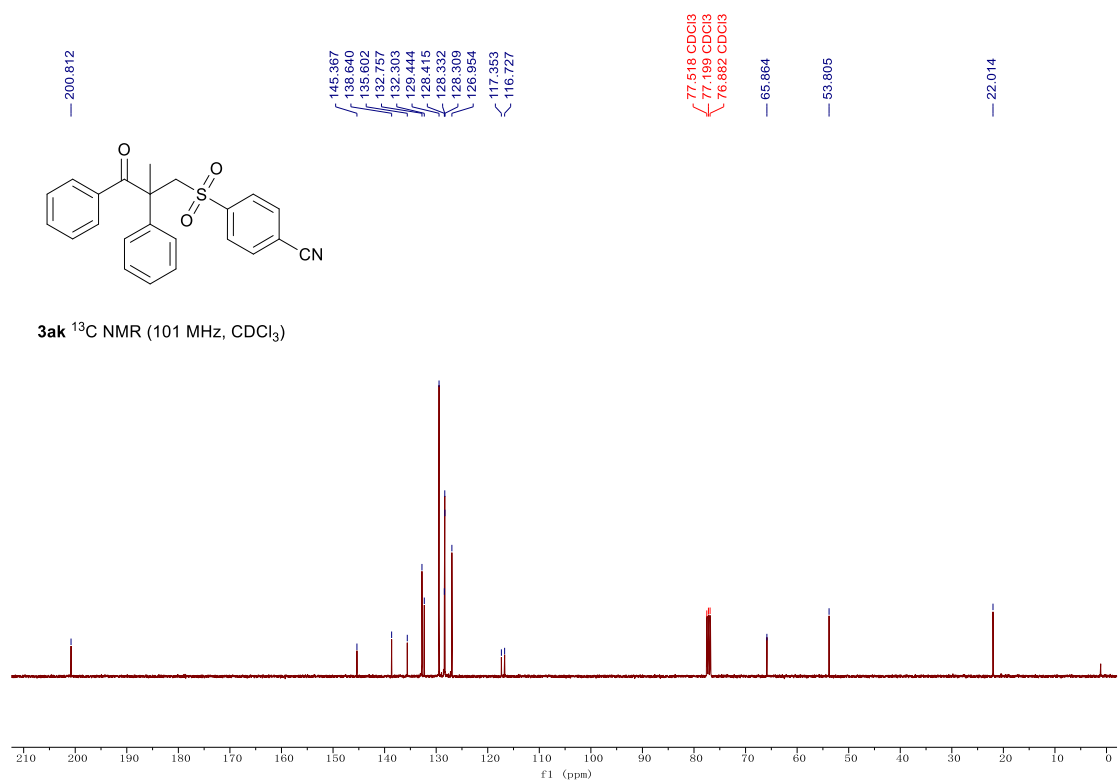

7.646  
7.641  
7.636  
7.625  
7.620  
7.615  
7.519  
7.514  
7.509  
7.498  
7.487  
7.481  
7.468  
7.420  
7.416  
7.411  
7.404  
7.399  
7.394  
7.383  
7.380  
7.374  
7.359  
7.355  
7.352  
7.343  
7.337  
7.330  
7.319  
7.314  
7.311  
7.300  
7.296  
7.291  
7.281  
7.277  
7.273  
7.269  
7.262  
7.252  
7.246  
7.239  
7.236  
7.233  
7.229  
7.226  
7.220  
7.218  
7.213  
7.203  
7.201  
7.197  
7.193  
7.191  
7.186  
7.178  
7.172  
7.158  
7.153  
7.140  
7.137  
7.124  
7.119  
4.042  
3.985  
3.977  
3.916  
2.060

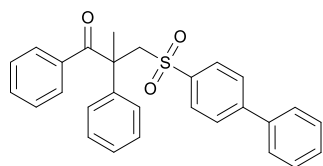

3a1 <sup>1</sup>H NMR (400 MHz, CDCl<sub>3</sub>)

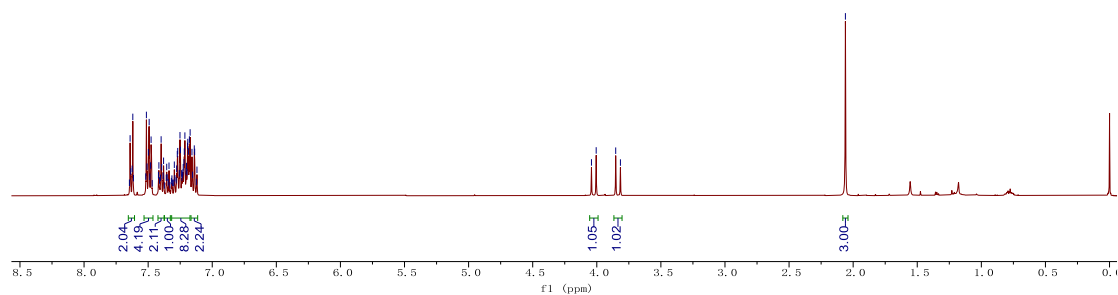

— 201.236

— 146.109  
— 140.051  
— 139.476  
— 139.264  
— 136.196  
— 132.033  
— 129.411  
— 129.393  
— 129.216  
— 128.697  
— 128.253  
— 128.178  
— 128.133  
— 127.789  
— 127.495  
— 126.883

— 77.519 CDCl<sub>3</sub>  
— 77.201 CDCl<sub>3</sub>  
— 76.884 CDCl<sub>3</sub>

— 65.723

— 53.805

— 22.227

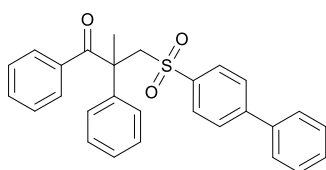

3a1 <sup>13</sup>C NMR (101 MHz, CDCl<sub>3</sub>)

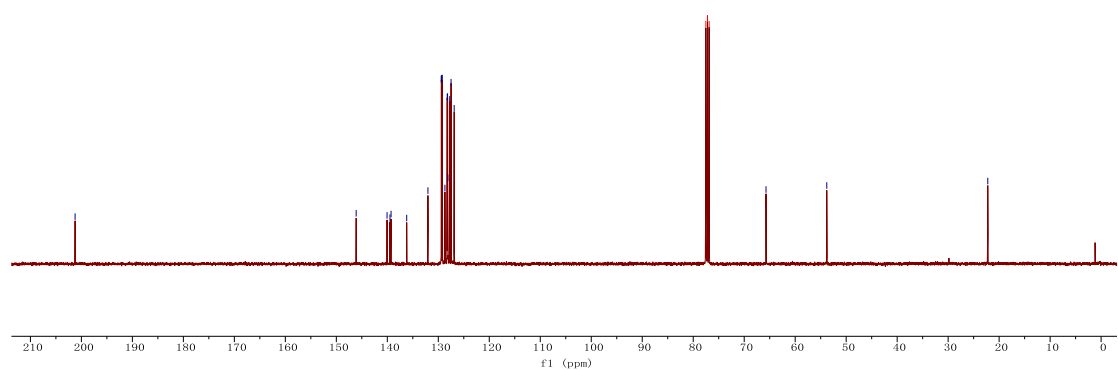

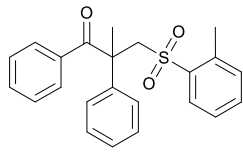

**3am**  $^1\text{H}$  NMR (400 MHz,  $\text{CDCl}_3$ )

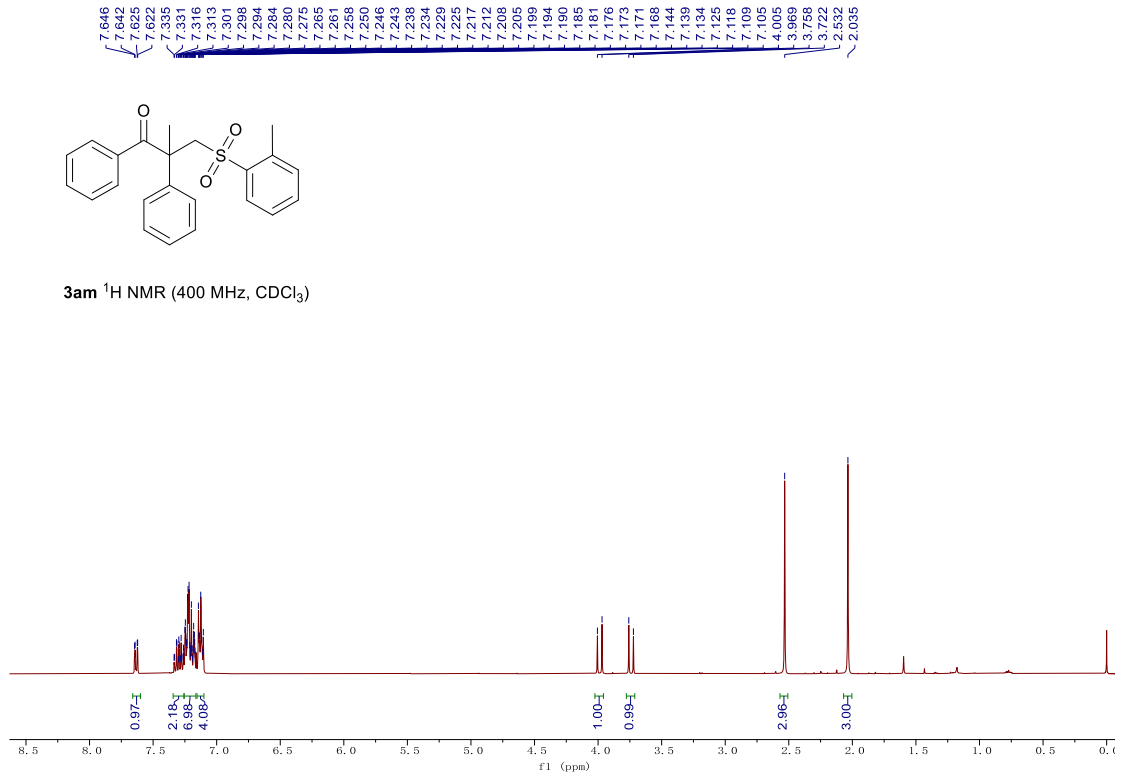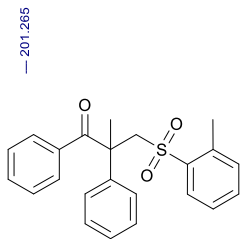

**3am**  $^{13}\text{C}$  NMR (101 MHz,  $\text{CDCl}_3$ )

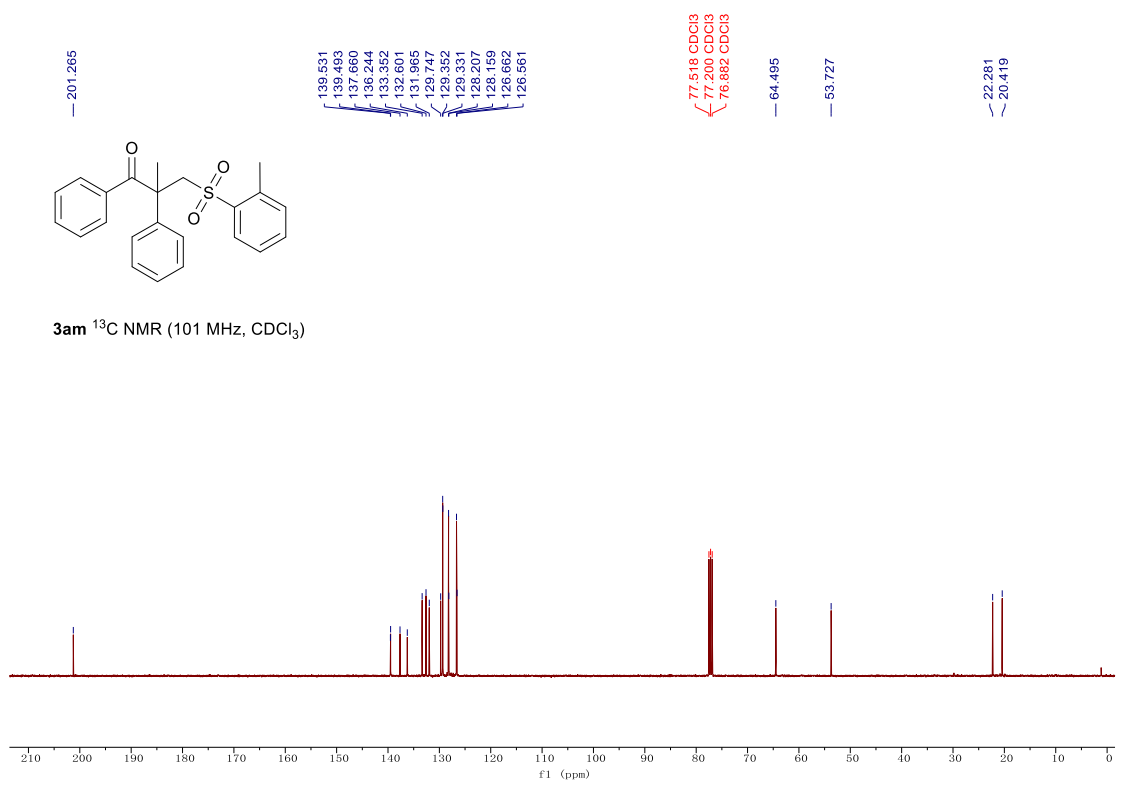

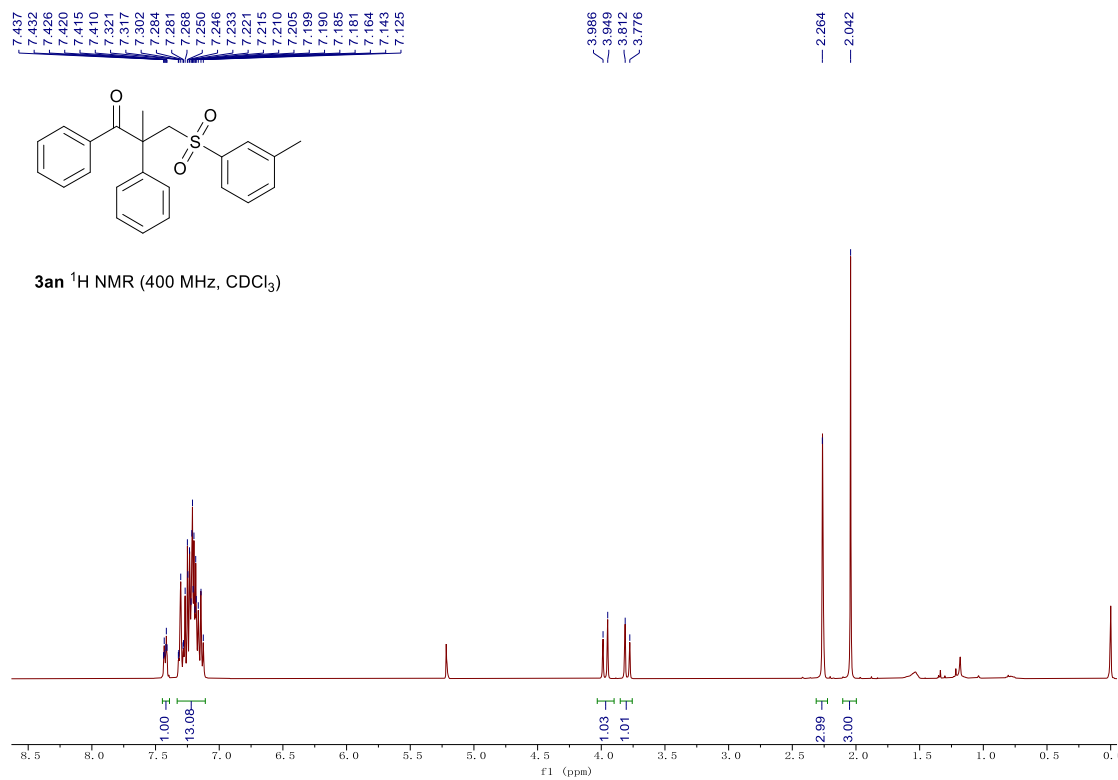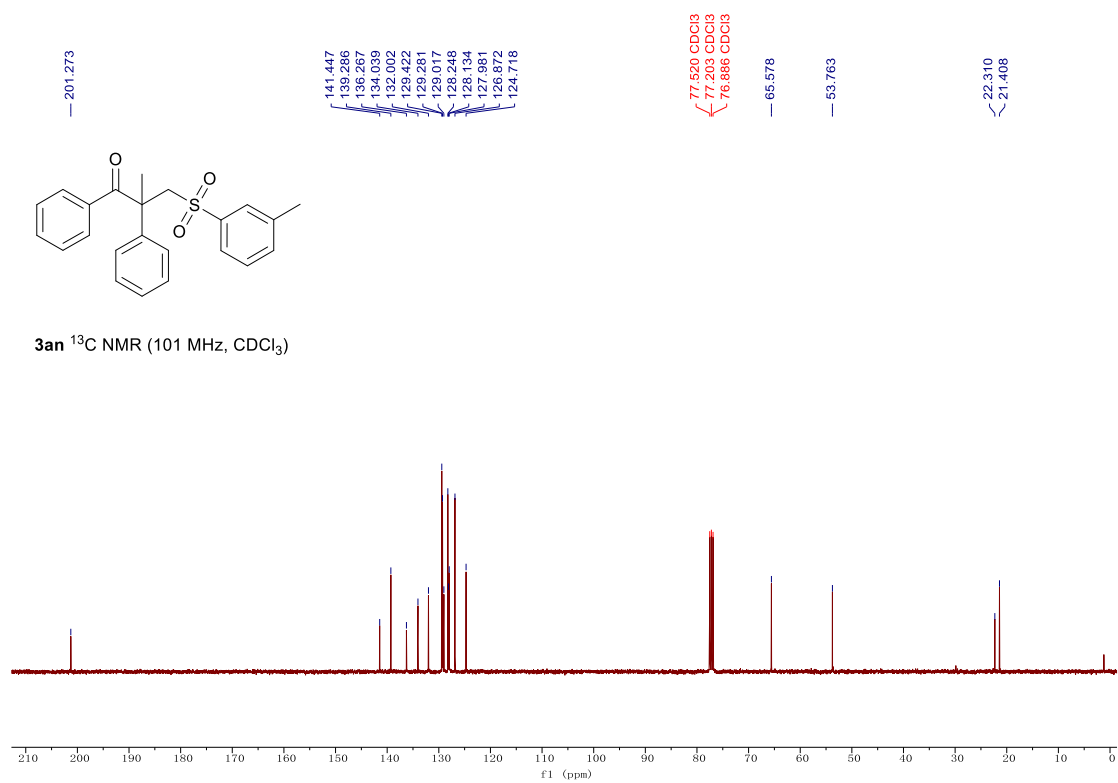



7.364  
7.359  
7.345  
7.339  
7.326  
7.320  
7.285  
7.284  
7.247  
7.243  
7.225  
7.213  
7.204  
7.194  
7.187  
7.165  
7.146  
7.126  
7.099  
7.079

3.992  
3.955  
3.771  
3.735

2.211  
2.160  
2.052

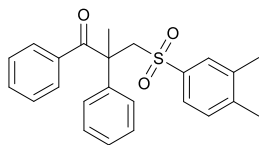

**3ao**  $^1\text{H}$  NMR (400 MHz,  $\text{CDCl}_3$ )

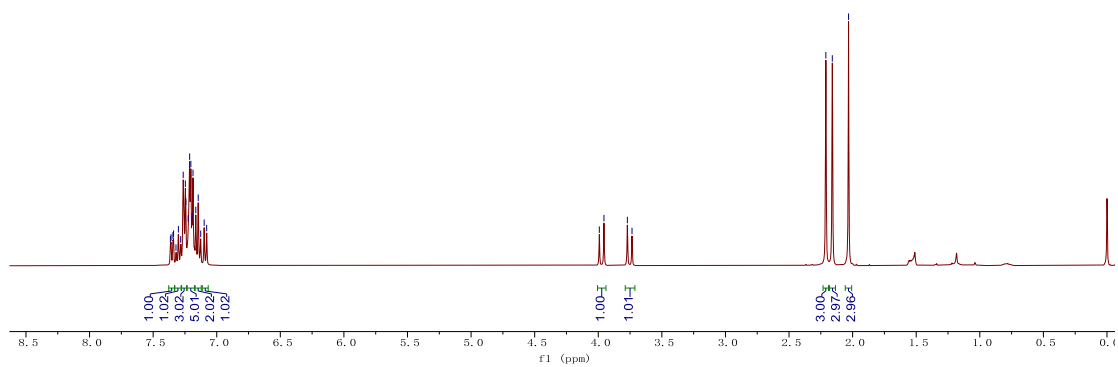

201.313

142.863  
138.819  
137.819  
137.760  
136.376  
131.924  
130.238  
129.386  
129.253  
128.458  
128.213  
127.999  
126.823  
125.138

77.520  $\text{CDCl}_3$   
77.203  $\text{CDCl}_3$   
76.885  $\text{CDCl}_3$

65.643

53.766

22.357  
20.084  
19.880

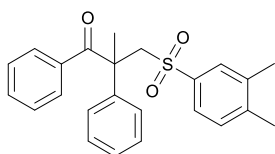

**3ao**  $^{13}\text{C}$  NMR (101 MHz,  $\text{CDCl}_3$ )

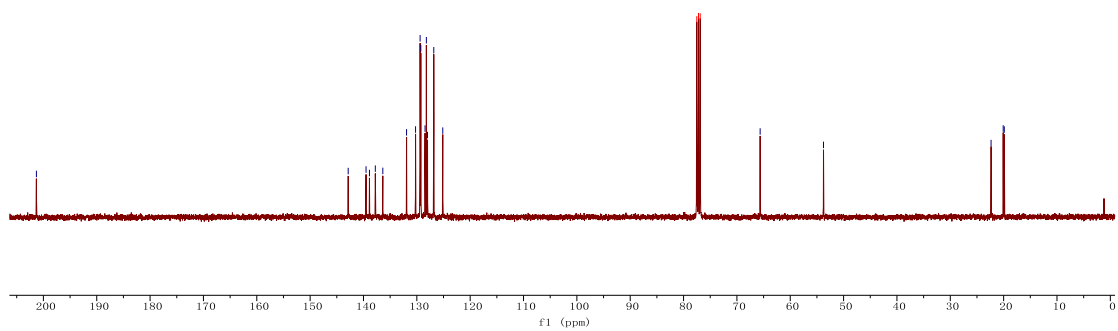

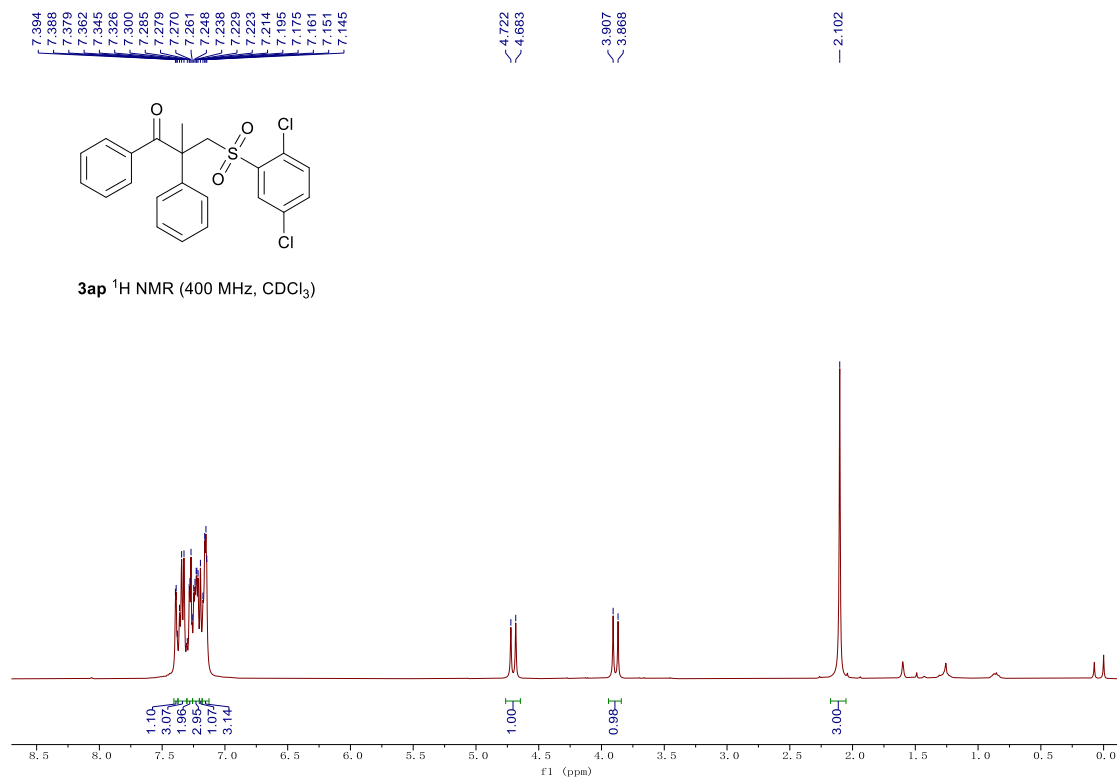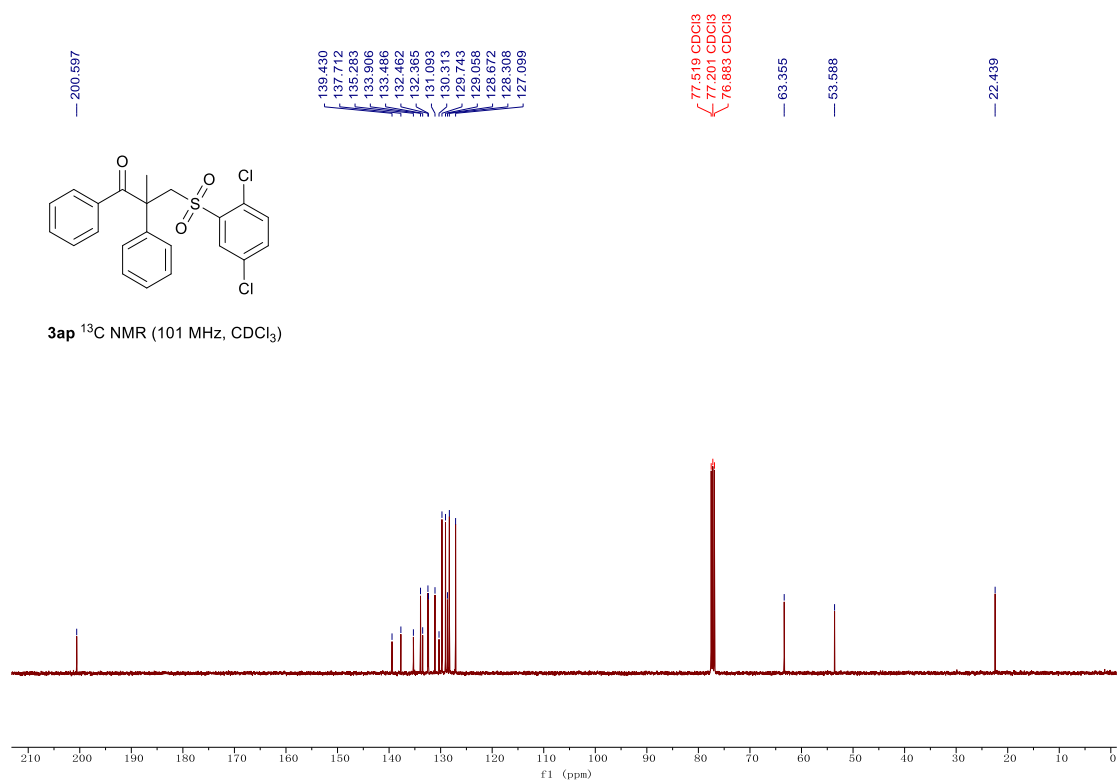

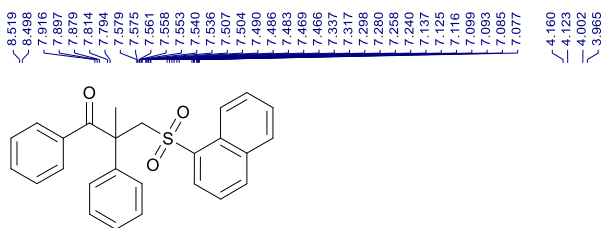

**3aq** <sup>1</sup>H NMR (400 MHz, CDCl<sub>3</sub>)

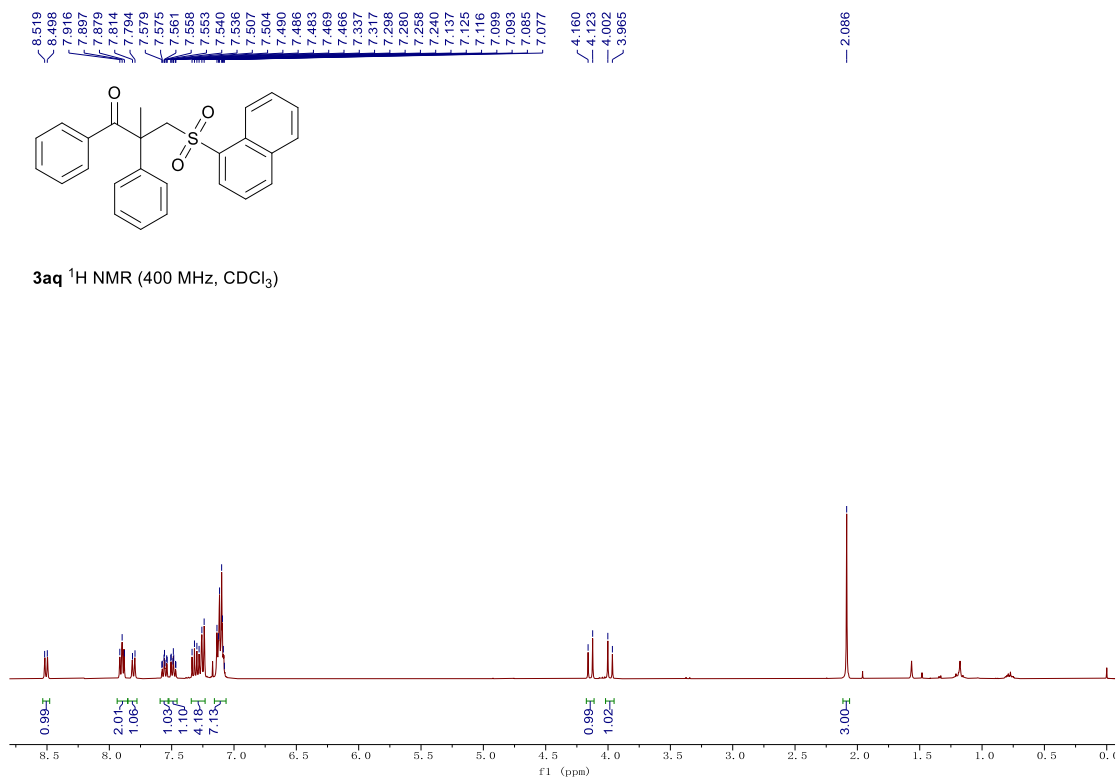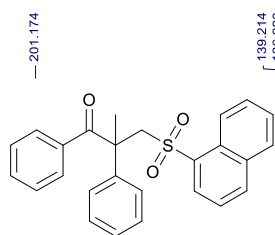

**3aq** <sup>13</sup>C NMR (101 MHz, CDCl<sub>3</sub>)

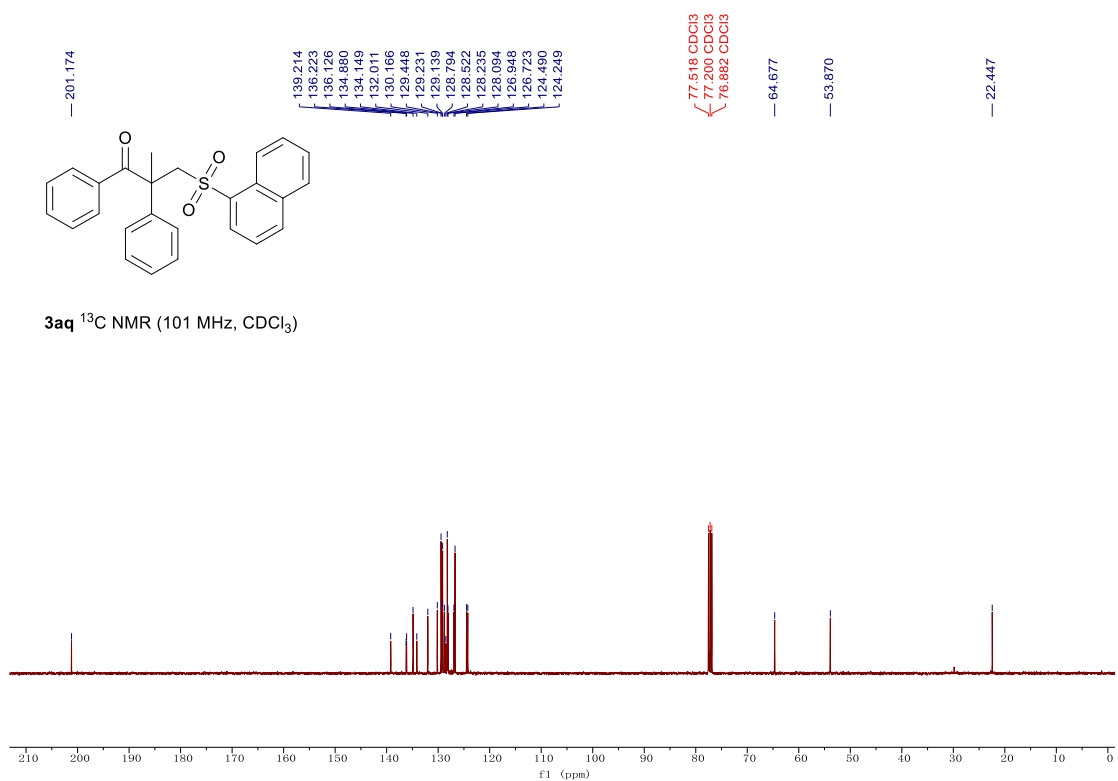

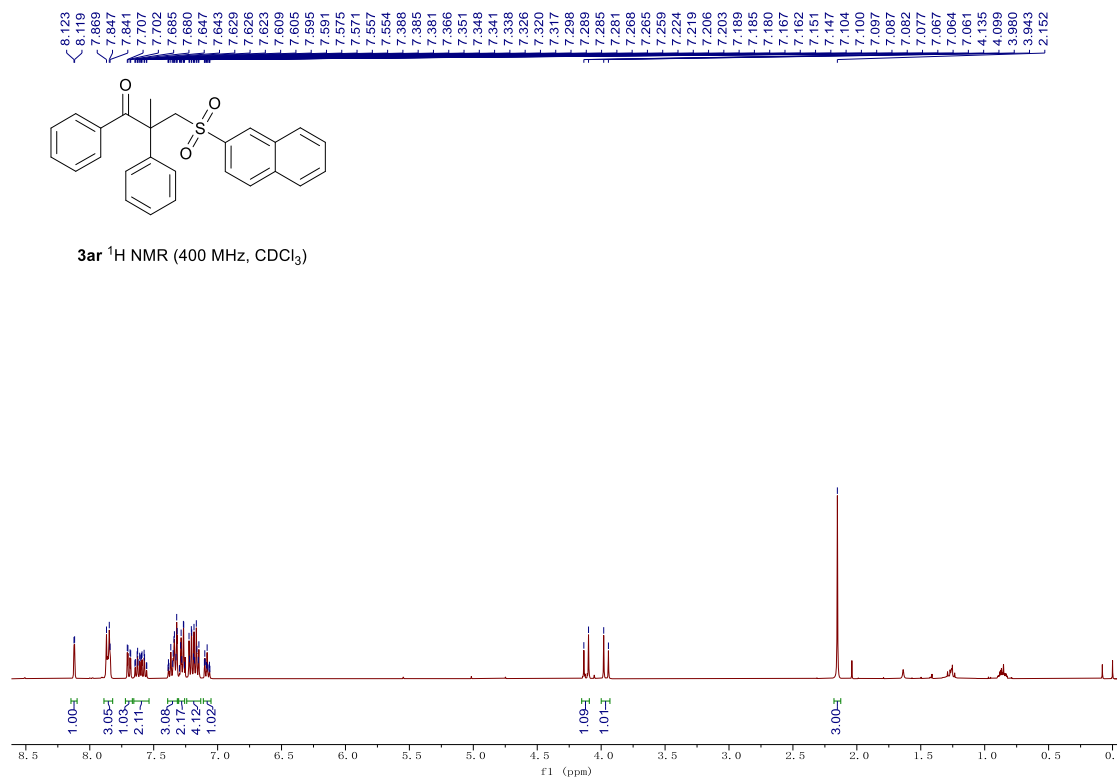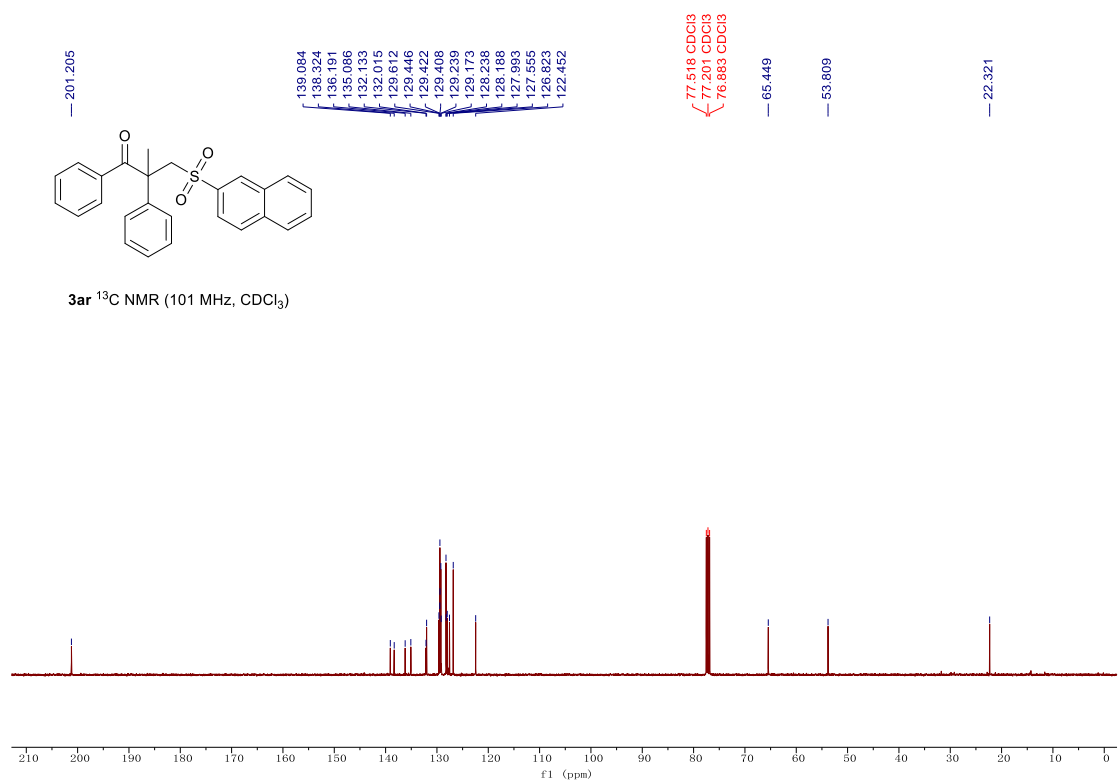

7.508  
7.504  
7.495  
7.492  
7.325  
7.322  
7.318  
7.308  
7.303  
7.299  
7.288  
7.284  
7.281  
7.276  
7.272  
7.262  
7.259  
7.257  
7.254  
7.251  
7.246  
7.238  
7.229  
7.225  
7.222  
7.219  
7.213  
7.211  
7.208  
7.205  
7.165  
7.160  
7.146  
7.144  
7.130  
7.126  
6.902  
6.892  
6.889  
4.140  
4.120  
4.086  
3.914  
3.877

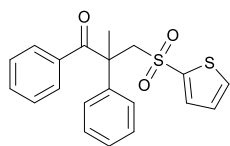

3as <sup>1</sup>H NMR (400 MHz, CDCl<sub>3</sub>)

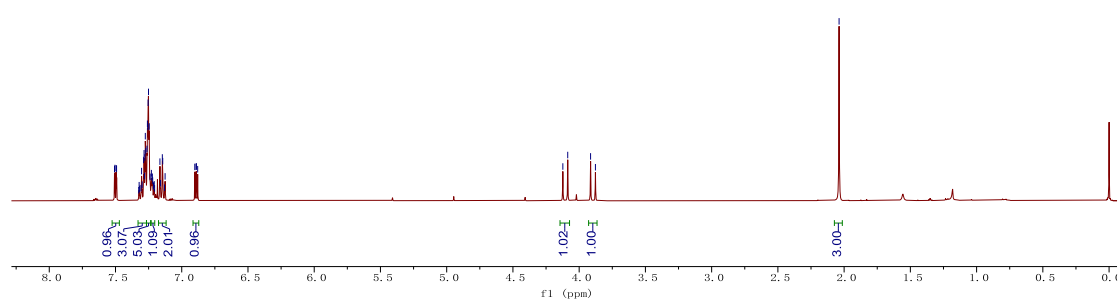

201.046

142.990  
136.717  
136.040  
133.696  
133.611  
132.098  
129.482  
129.440  
128.263  
128.236  
127.721  
126.848

77.516 CDCl<sub>3</sub>  
77.201 CDCl<sub>3</sub>  
76.865 CDCl<sub>3</sub>

67.174

53.966

22.126

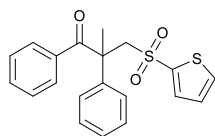

3as <sup>13</sup>C NMR (101 MHz, CDCl<sub>3</sub>)

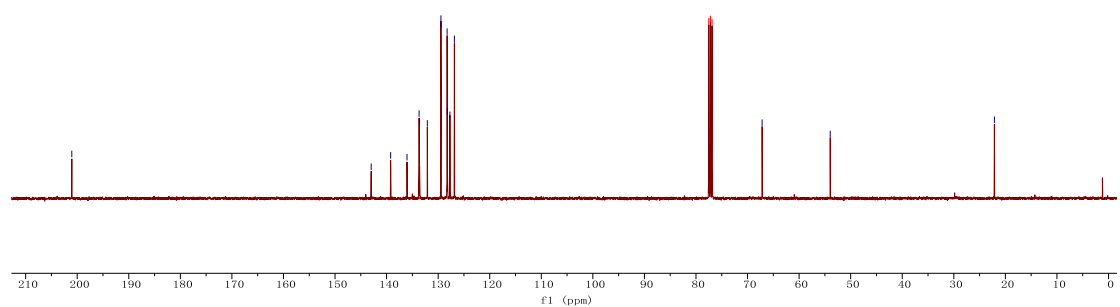

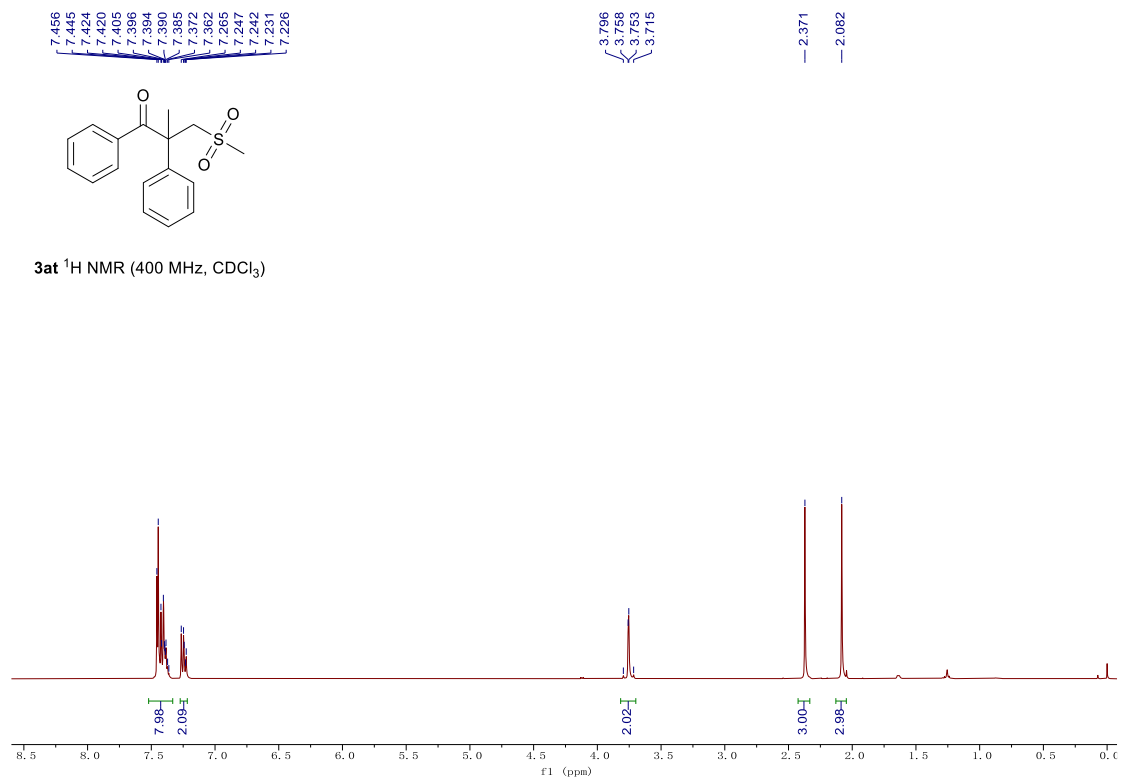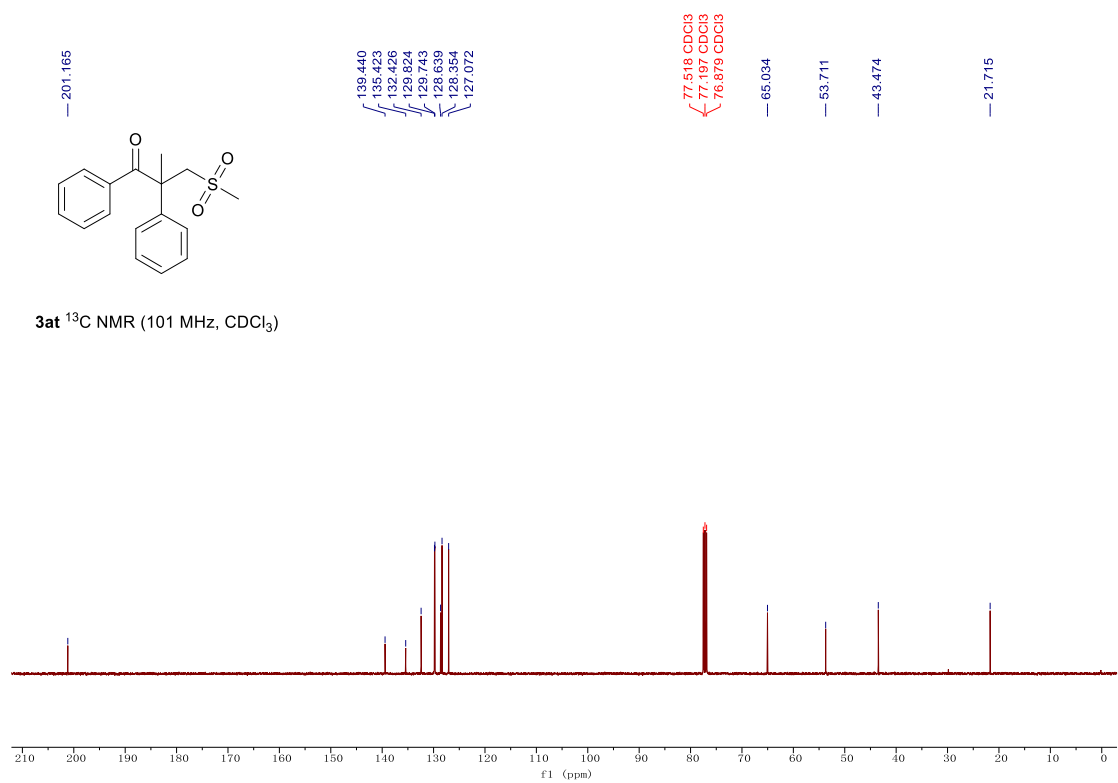

7.616  
7.611  
7.607  
7.595  
7.590  
7.585  
7.283  
7.263  
7.248  
7.243  
7.234  
7.224  
7.128  
7.124  
7.108  
7.092  
7.088  
7.066  
7.051  
7.047  
7.030  
7.011  
6.989  
6.982  
6.948  
6.929  
6.896  
6.877  
3.344  
3.331  
3.317  
3.305  
3.294  
3.277  
3.269  
3.233  
3.226  
3.217  
3.207  
3.196  
3.185  
3.175  
3.167  
3.154  
2.962  
2.926  
2.896  
2.865  
2.871  
1.860  
1.852  
1.832  
2.821  
2.814  
2.802  
2.795  
2.784  
2.405  
1.324

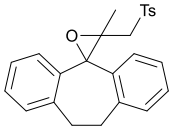

4 <sup>1</sup>H NMR (400 MHz, CDCl<sub>3</sub>)

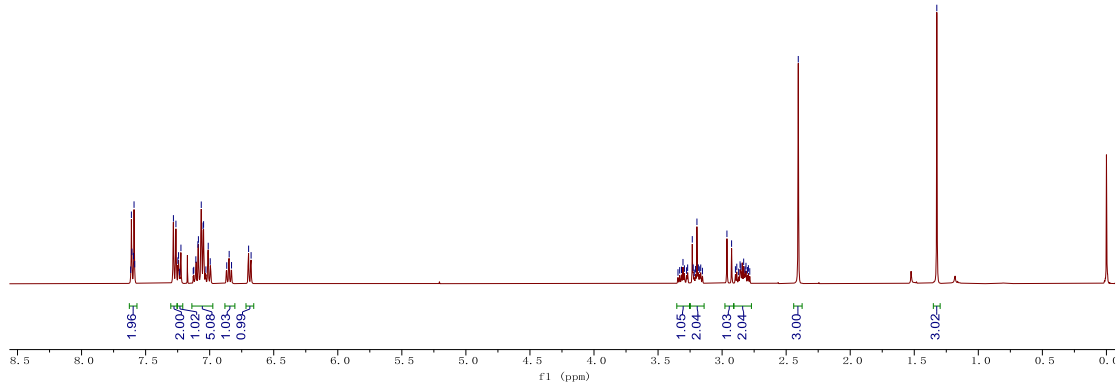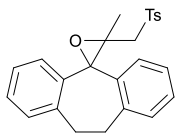

4 <sup>13</sup>C NMR (101 MHz, CDCl<sub>3</sub>)

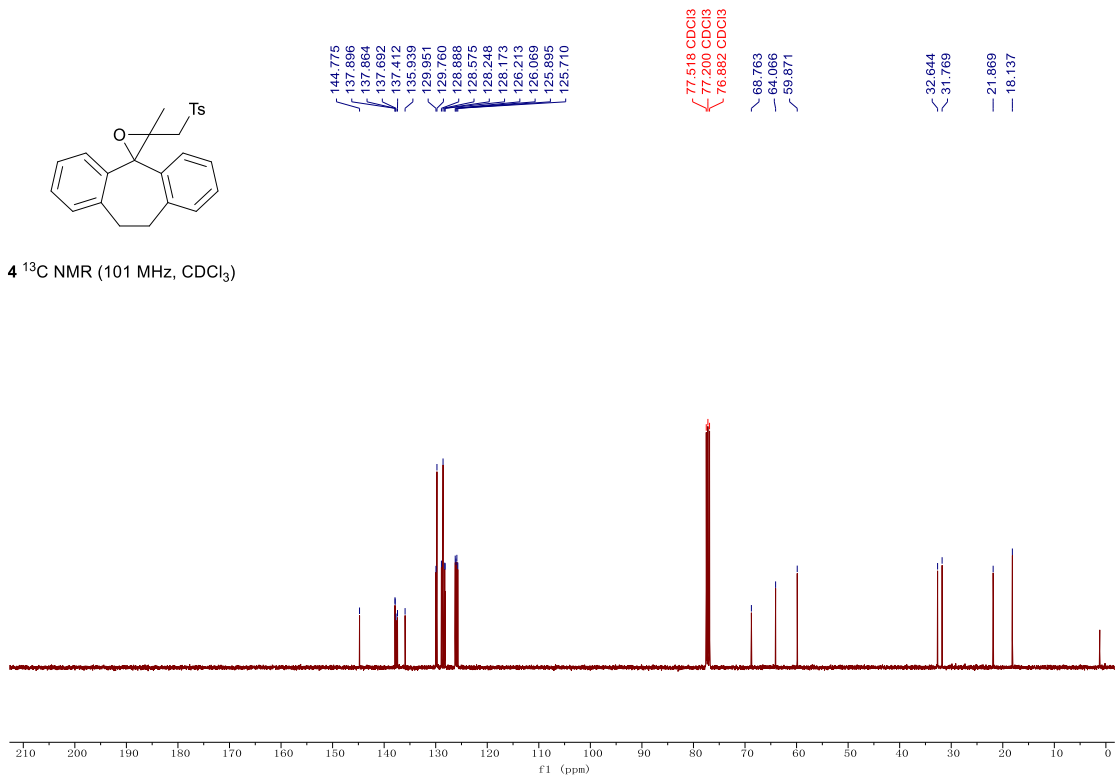

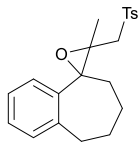

5  $^1\text{H}$  NMR (400 MHz,  $\text{CDCl}_3$ )

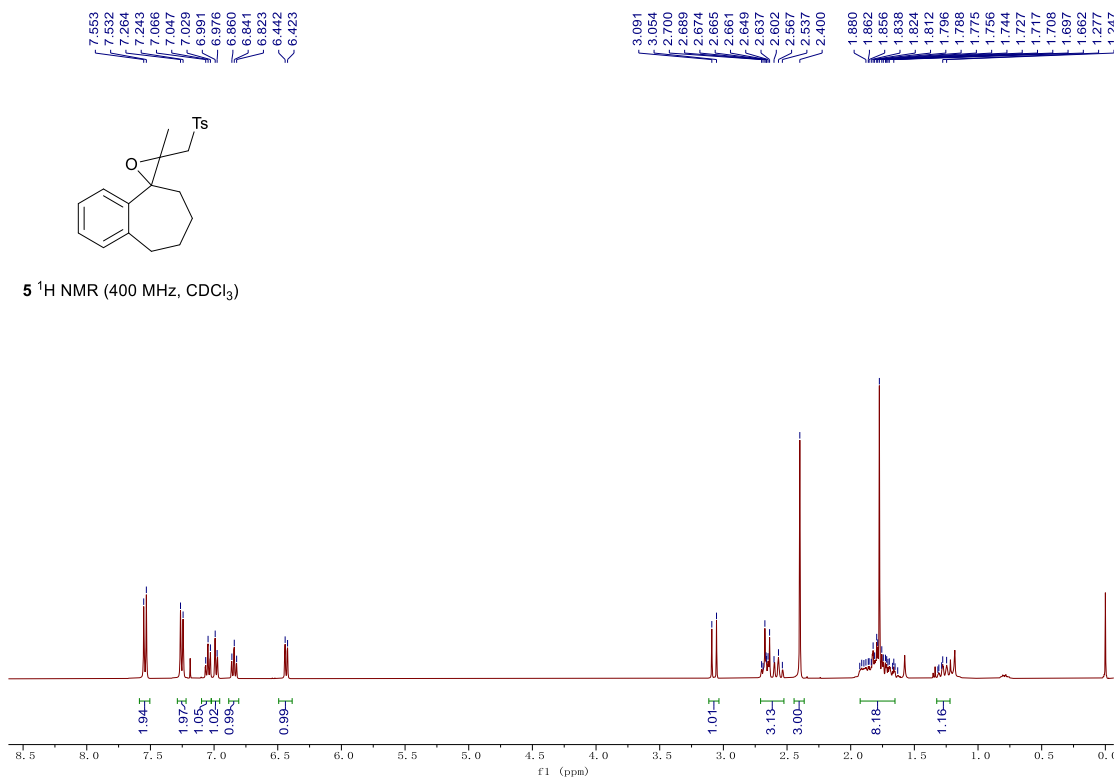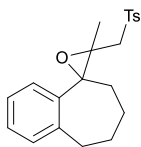

5  $^{13}\text{C}$  NMR (101 MHz,  $\text{CDCl}_3$ )

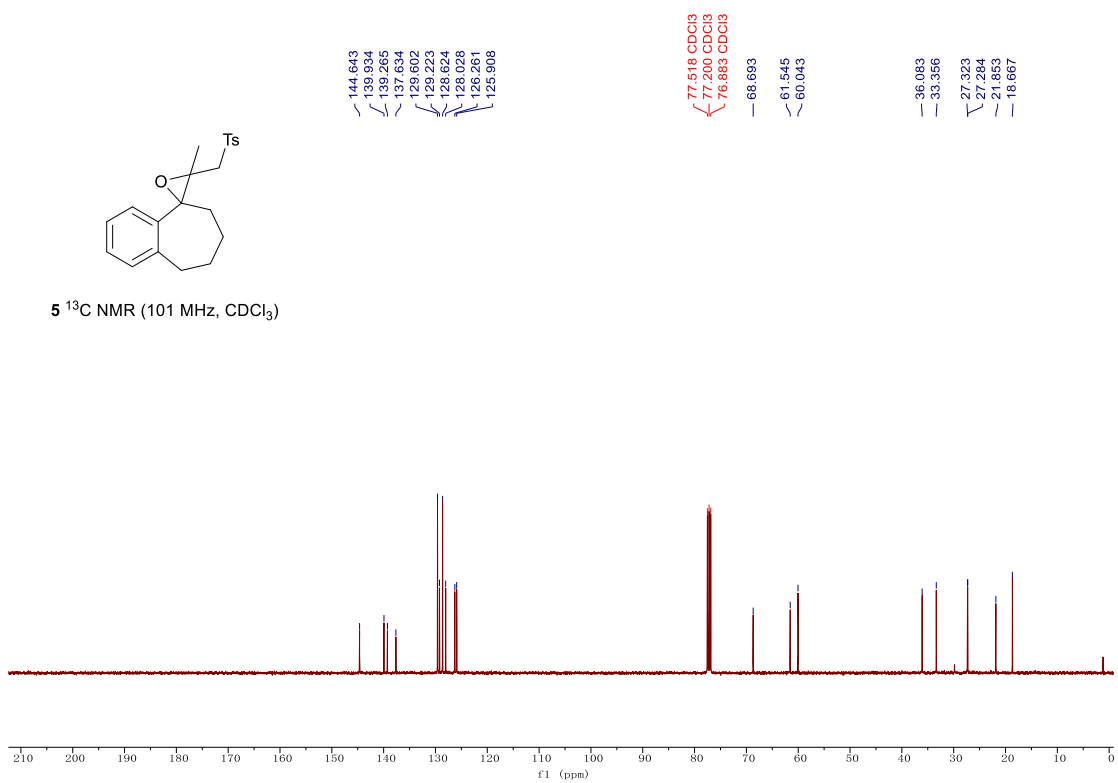



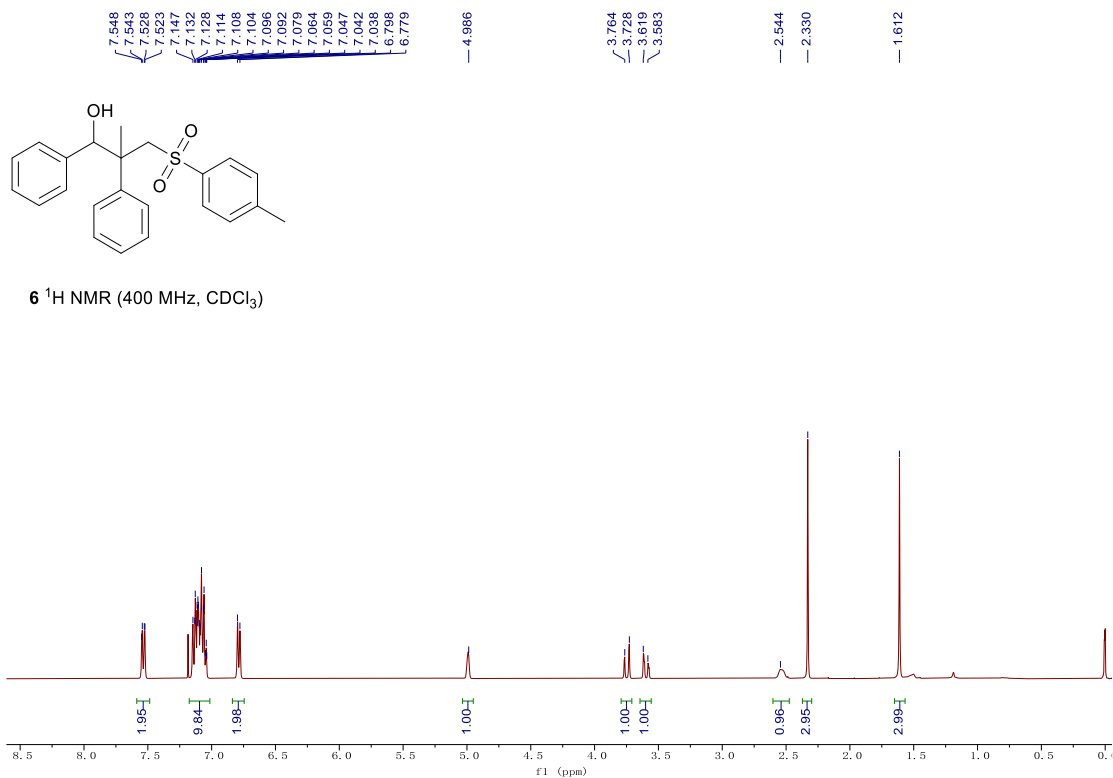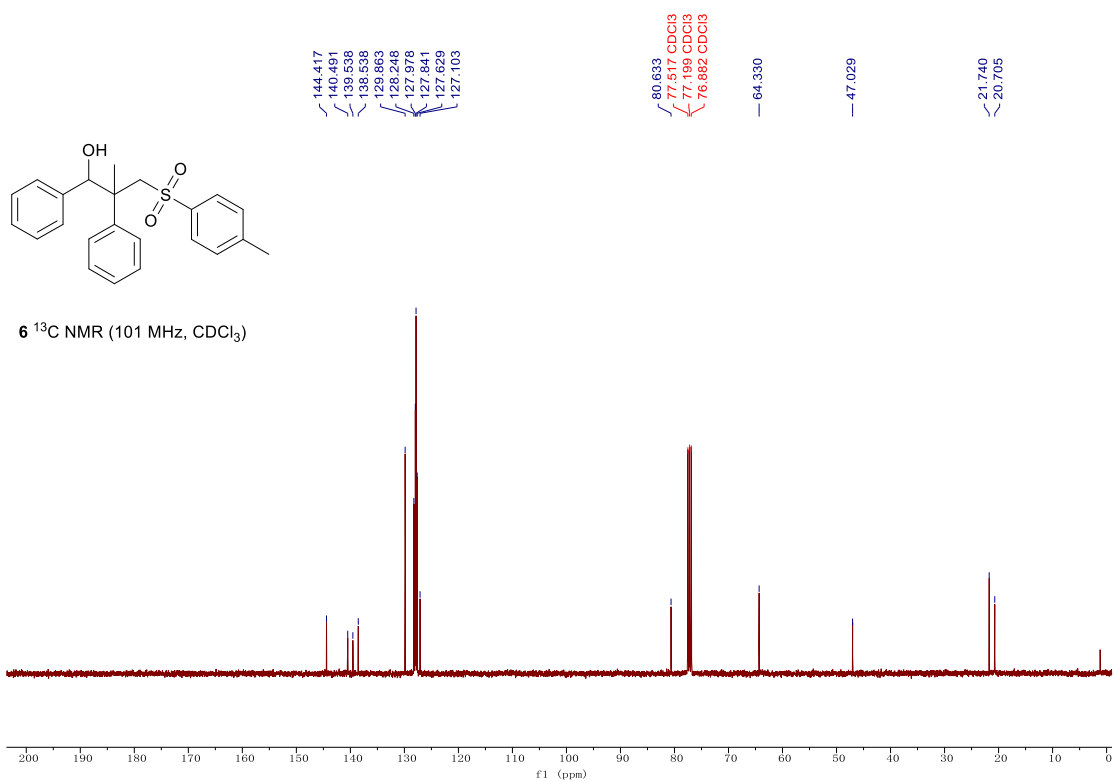

Supplement: d3gc02128a1.pdf [file d3gc02128a1.pdf]
